# Supplementary material for: A computational study on the N-heterocyclic carbene-catalyzed Csp2–Csp3 bond activation/[4+2] cycloaddition cascade reaction of cyclobutenones with imines: a new application of the conservation principle of molecular orbital symmetry
Source: Royal Society of Chemistry journal article supplement (doi:10.1039/c6cp03180c), 2016-01-01
Supplement: c6cp03180c1.pdf [file c6cp03180c1.pdf]

## Electronic Supplementary Information

### Computational study on N-heterocyclic carbene-catalyzed $C_{sp^2}-C_{sp^3}$ bond activation/[4 + 2] cycloaddition cascade reaction of cyclobutenones with imines: A new application of the conservation principle of molecular orbital symmetry

Yang Wang, Bohua Wu, Haoyang Zhang, Donghui Wei\*, and Mingsheng Tang  
The College of Chemistry and Molecular Engineering, Center of Computational Chemistry,  
Zhengzhou University, Zhengzhou, Henan Province, 450001, P.R. China

#### Content

|                                                                                    |     |
|------------------------------------------------------------------------------------|-----|
| <b>Part 1:</b> Single-point energies of all the stationary points .....            | S2  |
| <b>Part 2 :</b> Structures of the catalytic approach .....                         | S3  |
| <b>Part 3:</b> Structures and energy barriers of the regioselective approach ..... | S4  |
| <b>Part 4:</b> Structures of the direct approach.....                              | S5  |
| <b>Part 5:</b> Relationship between the energy gap of FMO.....                     | S6  |
| <b>Part 6:</b> The second-order perturbation energy of TS3RS and TS3SR .....       | S7  |
| <b>Part 7:</b> IRC points of <b>TS2</b> .....                                      | S8  |
| <b>Part 8:</b> IRC points of <b>Z-TS1<sup>D</sup></b> .....                        | S9  |
| <b>Part 9:</b> Coordinates of stationary points involved in the reaction.....      | S10 |

---

\* Corresponding authors: [donghuiwei@zzu.edu.cn](mailto:donghuiwei@zzu.edu.cn) (D. H. Wei)

## Part 1: Single-point energies of all the stationary points

**Table S1** The single-point energies of all the stationary points involved in the reaction calculated at M06-2X/6-311++G(2df,2pd)//IEF-PCM<sub>THF</sub>

|               | Sing-point energy |                                        | Sing-point energy |
|---------------|-------------------|----------------------------------------|-------------------|
| <b>R1</b>     | -920.62570823     | <b>PRR&amp;SS</b>                      | -1798.98332       |
| <b>R2</b>     | -878.2786203      | <b>PRS&amp;SR</b>                      | -1798.988297      |
| <b>Cat</b>    | -1016.33291       | <b>E-TS1<sup>D</sup></b>               | -920.5695735      |
| <b>Re-TS1</b> | -1936.96713       | <b>Z-TS1<sup>D</sup></b>               | -920.5827898      |
| <b>Si-TS1</b> | -1936.957173      | <b>E-M1<sup>D</sup></b>                | -920.62265        |
| <b>Re-M1</b>  | -1936.982733      | <b>Z-M1<sup>D</sup></b>                | -920.617716       |
| <b>Si-M1</b>  | -1936.972413      | <b>TS2<sup>D</sup>RR</b>               | -1798.882652      |
| <b>TS2</b>    | -1936.94772       | <b>TS2<sup>D</sup>RS</b>               | -1798.87269       |
| <b>M2</b>     | -1937.012953      | <b>TS2<sup>D</sup>SR</b>               | -1798.884337      |
| <b>TS3RR</b>  | -2815.287118      | <b>TS2<sup>D</sup>SS</b>               | -1798.869064      |
| <b>TS3RS</b>  | -2815.286813      | <b>TS3<sub>C=O</sub>RR</b>             | -2815.263799      |
| <b>TS3SR</b>  | -2815.29191       | <b>TS3<sub>C=O</sub>RS</b>             | -2815.263033      |
| <b>TS3SS</b>  | -2815.290985      | <b>TS3<sub>C=O</sub>SR</b>             | -2815.277918      |
| <b>M3RR</b>   | -2815.33405       | <b>TS3<sub>C=O</sub>SS</b>             | -2815.279695      |
| <b>M3RS</b>   | -2815.331375      | <b>M3<sub>C=O</sub>RR</b>              | -2815.299052      |
| <b>M3SR</b>   | -2815.339403      | <b>M3<sub>C=O</sub>RS</b>              | -2815.29045       |
| <b>M3SS</b>   | -2815.338189      | <b>M3<sub>C=O</sub>SR</b>              | -2815.28908       |
| <b>TS4RR</b>  | -2815.314664      | <b>M3<sub>C=O</sub>SS</b>              | -2815.292311      |
| <b>TS4RS</b>  | -2815.31693       | <b>TS2<sup>D</sup><sub>C=O</sub>RR</b> | -1798.872568      |
| <b>TS4SR</b>  | -2815.322517      | <b>TS2<sup>D</sup><sub>C=O</sub>RS</b> | -1798.872101      |
| <b>TS4SS</b>  | -2815.320558      | <b>TS2<sup>D</sup><sub>C=O</sub>SR</b> | -1798.871677      |
| <b>M4RR</b>   | -2815.336109      | <b>TS2<sup>D</sup><sub>C=O</sub>SS</b> | -1798.875537      |
| <b>M4RS</b>   | -2815.343197      | <b>P<sub>C=O</sub>RR&amp;SS</b>        | -1798.943668      |
| <b>M4SR</b>   | -2815.342035      | <b>P<sub>C=O</sub>RS&amp;SR</b>        | -1798.942863      |
| <b>M4SS</b>   | -2815.33734       |                                        |                   |

## Part 2 : Structures of the catalytic approach

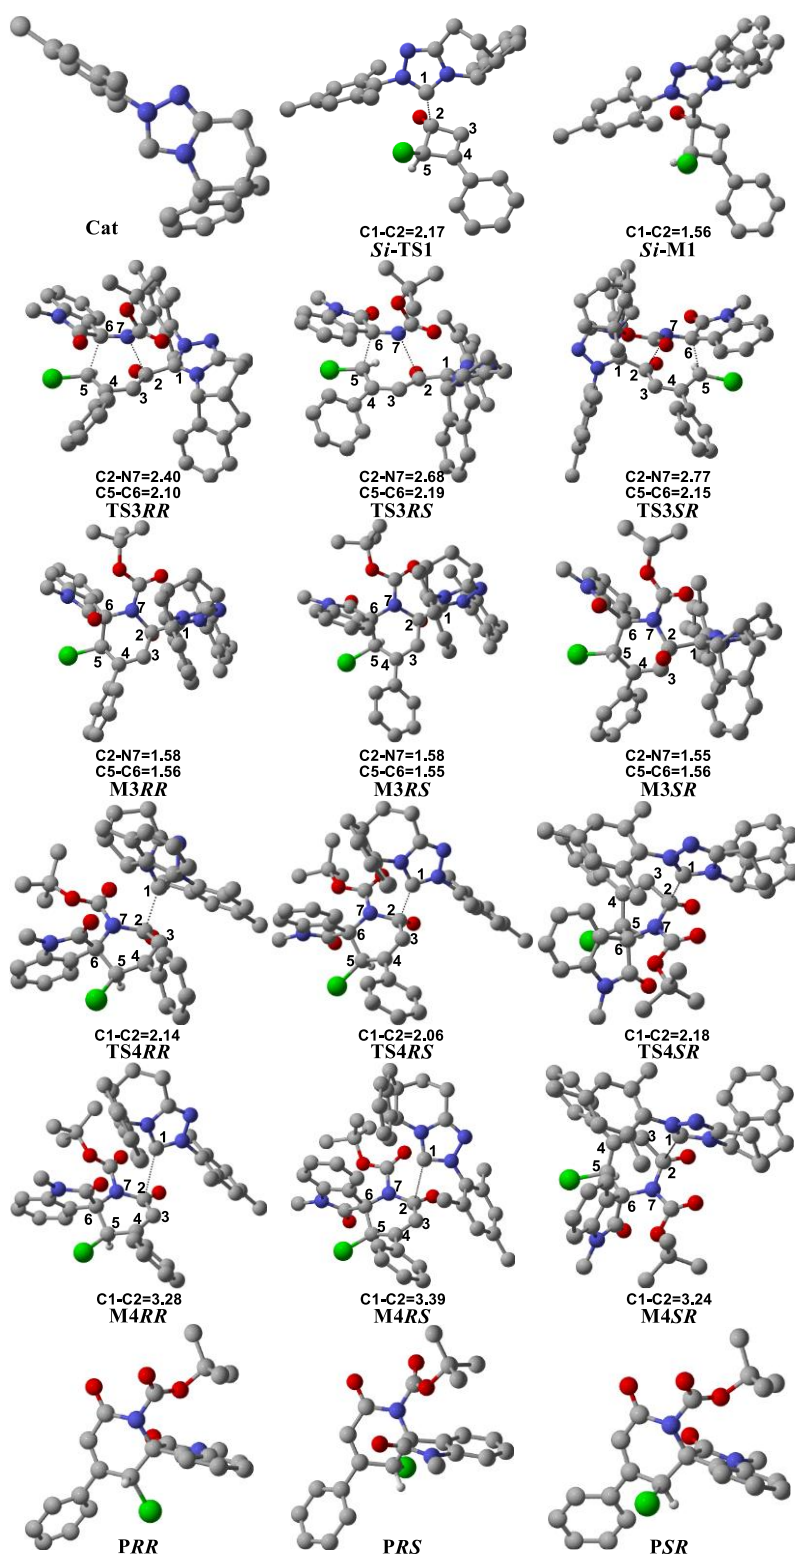

**Fig. S1** Optimized geometries of the stationary points involved in the catalytic approach. Most of the hydrogen atoms are omitted for sake of clarity (Distances are given in Å).

### Part 3: Structures and energy barriers of the regioselective approach

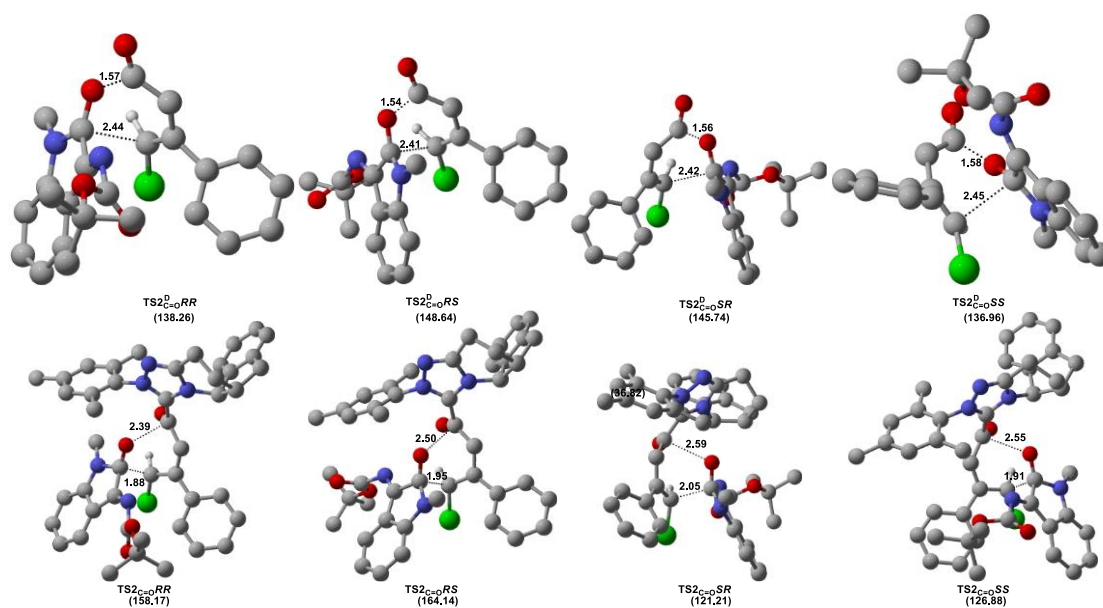

**Fig. S2** The optimized structures and energy barriers involved in the regioselective [4 + 2] cycloaddition of **M2** with C=O bond of **R2**. Most of the hydrogen atoms are omitted for sake of clarify (Distances and energies are given in Å and kJ/mol, respectively).

## Part 4: Structures of the direct approach

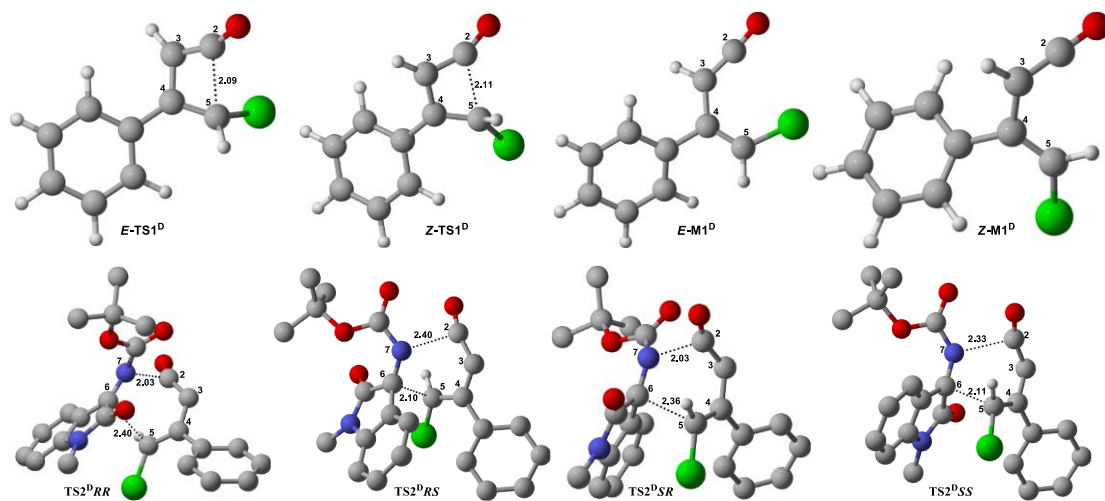

**Fig. S3** The optimized structures of the direct C-C bond cleavage/[4 + 2] cycloaddition approach. Most of the hydrogen atoms are omitted for sake of clarify (Distances are given in Å).

## Part 5: Relationship between the energy gap of FMO

**Table S2** Relationship between the energy gap of FMO and the Gibbs free energy barrier with different NHC catalysts

| Catalyst      | HOMO energy (eV)   |                    | Energy gap (eV) | Energy barrier (kcal/mol) |
|---------------|--------------------|--------------------|-----------------|---------------------------|
|               | HOMO <sub>M1</sub> | HOMO <sub>M2</sub> |                 |                           |
| <b>Direct</b> | <b>-8.69</b>       | <b>-7.25</b>       | <b>1.44</b>     | <b>26.08</b>              |
| A             | -6.72              | -5.82              | 0.90            | 19.55                     |
| B             | -6.84              | -5.83              | 1.01            | 19.68                     |
| C             | -6.95              | -6.02              | 0.93            | 17.52                     |
| <b>D</b>      | <b>-6.92</b>       | <b>-5.95</b>       | <b>0.97</b>     | <b>18.47</b>              |
| E             | -6.91              | -5.97              | 0.94            | 22.13                     |
| F             | -6.94              | -6.02              | 0.92            | 21.04                     |
| G             | -6.77              | -5.83              | 0.94            | 20.13                     |
| H             | -6.98              | -6.06              | 0.92            | 21.74                     |
| I             | -6.90              | -5.97              | 0.93            | 20.57                     |
| J             | -6.93              | -5.93              | 1.00            | 18.05                     |

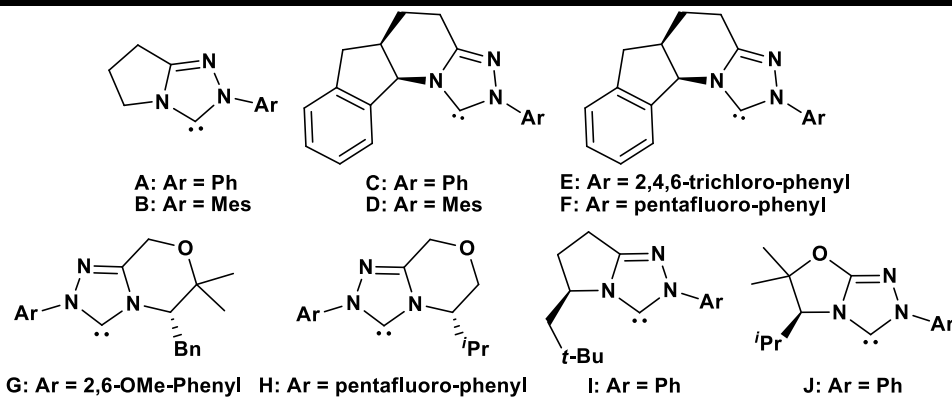

## Part 6: The second-order perturbation energy of TS3RS and TS3SR

**Table S3** The second-order perturbation energy  $E(2)$  (kcal/mol) of the donor-acceptor interactions in terms of forming bonds in **TS3RS** and **TS3SR**

| <b>TS3RS</b> |              |               |        | <b>TS3SR</b>  |               |                  |        |
|--------------|--------------|---------------|--------|---------------|---------------|------------------|--------|
| Donor        | Acceptor     | Interaction   | $E(2)$ | Donor         | Acceptor      | Interaction      | $E(2)$ |
| LP(1)C5      | BD*(2)C6-N7  | $n-\pi^*$     | 97.98  | LP(2)N7       | BD*(1)C5-C6   | $n-\sigma^*$     | 93.97  |
| BD(2)C6-N7   | LP(1)C5      | $\pi-n$       | 19.27  | BD*(1)C5-C6   | BD*(2)C4-C3   | $\sigma^*-\pi^*$ | 63.33  |
| BD*(2)C6-N7  | BD*(2)C2-O13 | $\pi^*-\pi^*$ | 15.88  | BD(1)C5-C6    | BD*(2)C4-C3   | $\sigma-\pi^*$   | 35.28  |
| BD*(2)C6-N7  | BD*(2)C4-C5  | $\pi^*-\pi^*$ | 12.92  | BD(1)C5-C6    | LP(2)N7       | $\sigma-n$       | 32.21  |
| BD(1)C6-C10  | LP(1)C5      | $\sigma-n$    | 6.60   | BD(1)C5-C6    | BD*(2)C10-O11 | $\sigma-\pi^*$   | 19.70  |
|              |              |               |        | BD(1)C5-C6    | BD*(2)C8-C9   | $\sigma-\pi^*$   | 12.88  |
|              |              |               |        | BD(2)C8-C9    | BD*(1)C5-C6   | $\pi-\sigma^*$   | 12.45  |
|              |              |               |        | LP(3)C112     | BD*(1)C5-C6   | $n-\sigma^*$     | 11.79  |
|              |              |               |        | BD*(2)C16-C17 | BD*(2)C4-C3   | $\pi^*-\pi^*$    | 11.06  |

Note: The overall delocalization in **TS3RS** is 152.65 kcal/mol and that in **TS3SR** is 292.67 kcal/mol.

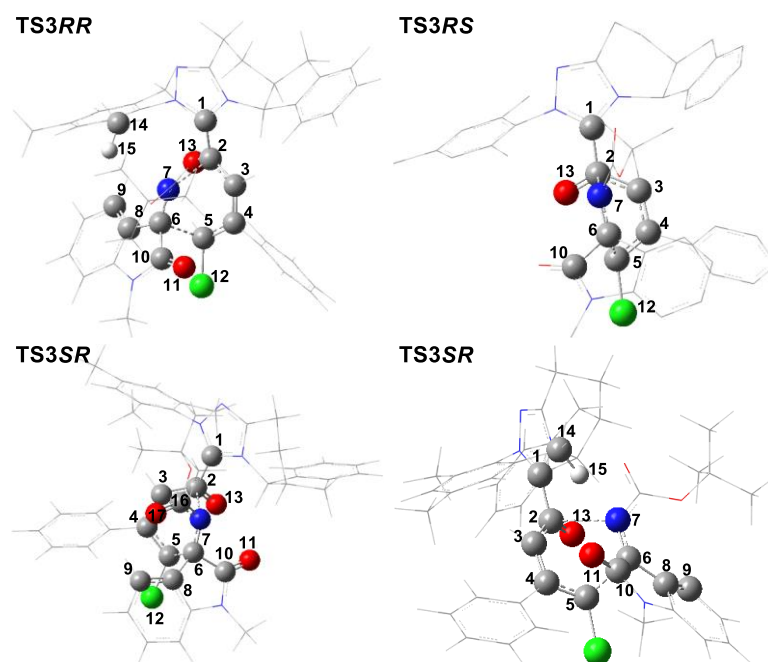

**Fig. S4** Labels of the transition states **TS3RR**, **TS3RS**, **TS3SR**, and **TS3SS**.

## Part 7: IRC points of TS2

**Table S4** The distances of C2–C5 (unit: Å) and single-point energies  $E$  (unit: a.u.) of several IRC points in **TS2** at M06-2X/6-31G(d, p)//IEF-PCM<sub>THF</sub> level

|           | C2–C5 | E              |
|-----------|-------|----------------|
| IRC-F-100 | 1.65  | -1936.49540061 |
| IRC-F-50  | 1.75  | -1936.48454074 |
| IRC-F-40  | 1.84  | -1936.47951416 |
| IRC-F-30  | 1.97  | -1936.47434926 |
| IRC-F-20  | 2.11  | -1936.46998270 |
| IRC-F-10  | 2.24  | -1936.46640997 |
| IRC-1     | 2.39  | -1936.46360342 |
| IRC-R-10  | 2.55  | -1936.46832159 |
| IRC-R-20  | 2.63  | -1936.47371341 |
| IRC-R-50  | 2.72  | -1936.48535544 |
| IRC-R-80  | 2.82  | -1936.49334845 |
| IRC-M2    | 2.95  | -1936.53058423 |

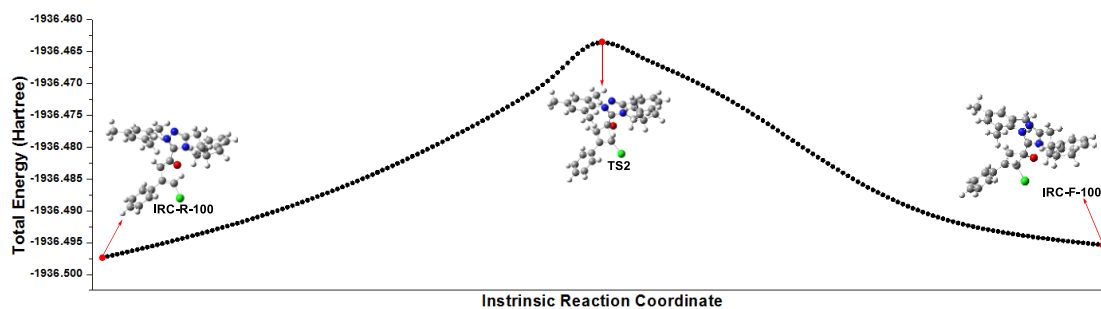

**Fig. S5** IRC points of **TS2**



## Part 8: IRC points of Z-TS1<sup>D</sup>

**Table S5** The distances of C2–C5 (unit: Å) and single-point energies  $E$  (unit: a.u.) of several IRC points in Z-TS1<sup>D</sup> at M06-2X/6-31G(d, p)//IEF-PCM<sub>THF</sub> level

|          | C2–C5 | E             |
|----------|-------|---------------|
| IRC-R-46 | 1.56  | -920.44134771 |
| IRC-R-15 | 1.67  | -920.42236633 |
| IRC-R-13 | 1.71  | -920.41959333 |
| IRC-R-11 | 1.79  | -920.41586485 |
| IRC-R-10 | 1.98  | -920.41362725 |
| IRC-1    | 2.09  | -920.39933771 |
| IRC-F-5  | 2.19  | -920.40141659 |
| IRC-F-10 | 2.36  | -920.40963177 |
| IRC-F-15 | 2.49  | -920.41521448 |
| IRC-F-25 | 2.58  | -920.42174136 |
| IRC-F-40 | 2.69  | -920.42837608 |
| IRC-F-50 | 2.78  | -920.43081851 |

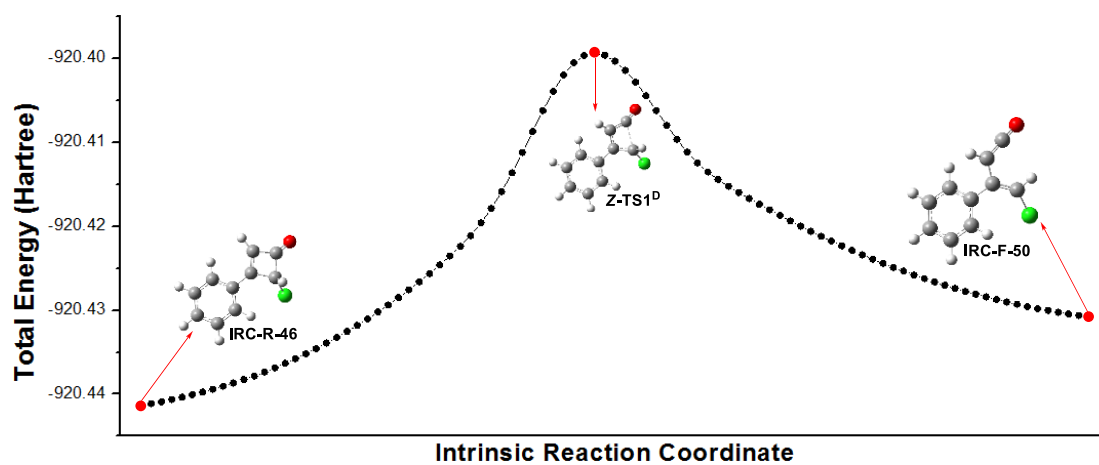

**Fig. S6** IRC pictures of Z-TS1<sup>D</sup>

## Part 9: Coordinates of stationary points involved in the reaction

### Coordinates of stationary points of all the stationary points involved in the reaction

#### R1

Total energy=-920.44408620

Sum of electronic and zero-point Energies= -920.301914

Sum of electronic and thermal Energies= -920.292098

Sum of electronic and thermal Enthalpies= -920.291154

Sum of electronic and thermal Free Energies= -920.338660

|    |             |             |             |
|----|-------------|-------------|-------------|
| C  | -0.45287000 | -0.59244700 | 0.17004600  |
| C  | -1.59994100 | 0.33090000  | 0.53295500  |
| C  | -2.46693200 | -0.91828500 | 0.22248900  |
| C  | -1.23402400 | -1.68968600 | -0.01073800 |
| H  | -1.62871600 | 0.70157600  | 1.55853600  |
| H  | -1.03080600 | -2.73070700 | -0.22957600 |
| O  | -3.65406700 | -1.09567400 | 0.16276500  |
| C  | 0.97014900  | -0.31490200 | 0.09385600  |
| C  | 1.45877400  | 0.94029700  | 0.47870400  |
| C  | 1.86267400  | -1.29938800 | -0.35547700 |
| C  | 2.82279700  | 1.20379300  | 0.42272600  |
| H  | 0.76860400  | 1.70580500  | 0.82087900  |
| C  | 3.22289100  | -1.03144300 | -0.41135000 |
| H  | 1.48260000  | -2.26901200 | -0.66323900 |
| C  | 3.70359600  | 0.21999800  | -0.02169200 |
| H  | 3.19831300  | 2.17563200  | 0.72420600  |
| H  | 3.91107400  | -1.79375700 | -0.76036600 |
| H  | 4.76764600  | 0.42775500  | -0.06766100 |
| Cl | -1.87993300 | 1.73265100  | -0.55376500 |

#### R2

Total energy= -877.99334470

Sum of electronic and zero-point Energies= -877.707527

Sum of electronic and thermal Energies= -877.689625

Sum of electronic and thermal Enthalpies= -877.688681

Sum of electronic and thermal Free Energies= -877.753987

|   |             |             |             |
|---|-------------|-------------|-------------|
| C | 2.59576300  | 0.44890400  | 0.10624300  |
| C | 1.21631800  | 0.49829500  | -0.16664900 |
| C | 0.57289700  | 1.72089700  | -0.31572300 |
| C | 1.32200700  | 2.88980700  | -0.17564300 |
| C | 2.68778000  | 2.82316400  | 0.10013700  |
| C | 3.35130000  | 1.60125700  | 0.24425100  |
| C | 2.00764300  | -1.75830100 | 0.00544100  |
| C | 0.75982600  | -0.89584400 | -0.23263200 |
| H | -0.48439000 | 1.76892100  | -0.55302900 |
| H | 0.84149200  | 3.85460800  | -0.28953600 |
| H | 3.25485500  | 3.74282700  | 0.20169900  |
| H | 4.41420000  | 1.56059200  | 0.45404700  |
| N | 3.03959000  | -0.87629200 | 0.20444000  |
| O | 2.06676500  | -2.96701900 | 0.02005300  |
| N | -0.36538000 | -1.45392800 | -0.40857600 |
| C | 4.40600500  | -1.27181900 | 0.46713600  |
| H | 4.43268700  | -2.36096000 | 0.48417700  |

|   |             |             |             |
|---|-------------|-------------|-------------|
| H | 5.06988500  | -0.90270400 | -0.31921300 |
| H | 4.73784000  | -0.88346200 | 1.43367200  |
| C | -1.50058300 | -0.65708600 | -0.66128700 |
| O | -1.73112300 | -0.15721200 | -1.73825100 |
| O | -2.26953100 | -0.63046600 | 0.41928300  |
| C | -3.57386100 | 0.04301000  | 0.39384900  |
| C | -3.38270800 | 1.53139400  | 0.12562900  |
| C | -4.47902000 | -0.62485800 | -0.63469200 |
| C | -4.09401200 | -0.18854100 | 1.80629800  |
| H | -2.66347900 | 1.95120600  | 0.83538100  |
| H | -3.03665700 | 1.71051700  | -0.89318200 |
| H | -4.33819900 | 2.04432700  | 0.26456700  |
| H | -4.54053700 | -1.69877600 | -0.43851300 |
| H | -5.48367600 | -0.20165000 | -0.55073500 |
| H | -4.11279600 | -0.46399100 | -1.64882100 |
| H | -5.07824200 | 0.27262500  | 1.91748200  |
| H | -4.18303100 | -1.25888100 | 2.00803000  |
| H | -3.41444000 | 0.25224000  | 2.54007800  |

### NHC

Total energy= - 1016.03688327

Sum of electronic and zero-point Energies= -1015.628659

Sum of electronic and thermal Energies= -1015.607664

Sum of electronic and thermal Enthalpies= -1015.606720

Sum of electronic and thermal Free Energies= -1015.679329

|   |             |             |             |
|---|-------------|-------------|-------------|
| C | -2.89624900 | 0.67857700  | 0.70169900  |
| C | -3.88776200 | 0.57289100  | -0.27316900 |
| C | -4.56991900 | 1.70784700  | -0.70255900 |
| C | -4.24398500 | 2.94244600  | -0.14406300 |
| C | -3.24452000 | 3.04406500  | 0.82661800  |
| C | -2.55909400 | 1.90886900  | 1.25606000  |
| C | -2.28900500 | -0.67590100 | 0.99947700  |
| C | -3.28682100 | -1.66808100 | 0.34307000  |
| C | -4.03518800 | -0.85398700 | -0.73848300 |
| H | -5.34565100 | 1.63208200  | -1.45922800 |
| H | -4.77271000 | 3.83476100  | -0.46467700 |
| H | -3.00324400 | 4.01339000  | 1.25114500  |
| H | -1.77067900 | 1.97746800  | 1.99836400  |
| H | -4.01244400 | -1.91808700 | 1.12341400  |
| H | -3.58033300 | -0.97579600 | -1.72937400 |
| H | -2.18890300 | -0.85762200 | 2.07281700  |
| H | -5.07835200 | -1.17033100 | -0.82878300 |
| C | -0.55744400 | -1.68867900 | -0.54409100 |
| C | 0.12044700  | -0.01832500 | 0.82430000  |
| N | 0.70411300  | -1.53767700 | -0.82205900 |
| N | -0.93868100 | -0.79466800 | 0.42817500  |
| N | 1.08353700  | -0.51410800 | 0.02212400  |
| C | -1.49929900 | -2.68125100 | -1.14009400 |
| H | -1.89585500 | -2.28753000 | -2.08183500 |
| H | -0.94804200 | -3.59172600 | -1.38377600 |
| C | 2.44021200  | -0.06270100 | -0.01414200 |
| C | 2.71788200  | 1.19689000  | -0.54878400 |
| C | 3.44354300  | -0.90164000 | 0.48276500  |
| C | 4.05010300  | 1.61482500  | -0.57348500 |
| C | 4.75899000  | -0.44655100 | 0.43119900  |

|   |             |             |             |
|---|-------------|-------------|-------------|
| C | 5.08061100  | 0.80702300  | -0.09472100 |
| H | 4.28553800  | 2.59405700  | -0.98329000 |
| H | 5.55228500  | -1.08272200 | 0.81743700  |
| C | 1.61287300  | 2.07110700  | -1.08120300 |
| H | 1.05218600  | 1.55110100  | -1.86454000 |
| H | 0.89846000  | 2.31910700  | -0.29147700 |
| H | 2.01944700  | 2.99390300  | -1.49887700 |
| C | 6.51667200  | 1.26317400  | -0.15050800 |
| H | 6.58572800  | 2.32325600  | -0.41053300 |
| H | 7.01501800  | 1.11107400  | 0.81311600  |
| H | 7.07707200  | 0.69326100  | -0.90133900 |
| C | 3.09654500  | -2.24380300 | 1.07004600  |
| H | 2.32123700  | -2.13894900 | 1.83579000  |
| H | 2.69895000  | -2.91440800 | 0.30342800  |
| H | 3.97528100  | -2.70654300 | 1.52176900  |
| C | -2.63548100 | -2.96075100 | -0.15038000 |
| H | -2.23634000 | -3.51380400 | 0.70723300  |
| H | -3.39008700 | -3.59702800 | -0.62178700 |

### Re-TS1

Total energy= - 1936.48669487

Sum of electronic and zero-point Energies= -1935.935618

Sum of electronic and thermal Energies= -1935.904212

Sum of electronic and thermal Enthalpies= -1935.903267

Sum of electronic and thermal Free Energies= -1935.999586

|   |             |             |             |
|---|-------------|-------------|-------------|
| C | 3.87381000  | -0.11205900 | -0.58381400 |
| C | 5.14468600  | -0.08255000 | -0.02273800 |
| C | 6.15392100  | 0.66642300  | -0.63078900 |
| C | 5.86120000  | 1.37170400  | -1.79475200 |
| C | 4.57763600  | 1.33316700  | -2.35350700 |
| C | 3.57049600  | 0.58524000  | -1.74958500 |
| C | 2.92673200  | -0.96035000 | 0.23741200  |
| C | 3.81055500  | -1.54367700 | 1.38967300  |
| C | 5.22177300  | -0.91267000 | 1.22935800  |
| H | 7.14919900  | 0.70257200  | -0.20293300 |
| H | 6.63773500  | 1.95985000  | -2.27747200 |
| H | 4.36933600  | 1.88387200  | -3.26566200 |
| H | 2.57290000  | 0.51622400  | -2.17842600 |
| H | 3.88286700  | -2.62319000 | 1.22193400  |
| H | 5.48656800  | -0.29415800 | 2.09644900  |
| H | 2.45950000  | -1.74039900 | -0.37070800 |
| H | 5.99028800  | -1.68760000 | 1.15682200  |
| C | 1.78068900  | 0.46153700  | 1.98816900  |
| C | 0.71930900  | 0.22817700  | 0.04261500  |
| N | 0.71226200  | 1.19335200  | 2.10781900  |
| N | 1.81555300  | -0.13849200 | 0.74915000  |
| N | 0.08083700  | 1.03849100  | 0.89767200  |
| C | 2.82703100  | 0.14571400  | 3.00061200  |
| H | 3.68797300  | 0.81040100  | 2.86244900  |
| H | 2.42460800  | 0.32948700  | 3.99658900  |
| C | -1.12535400 | 1.75373900  | 0.61724700  |
| C | -1.08397300 | 2.79516500  | -0.31221800 |
| C | -2.30778900 | 1.35467400  | 1.25518600  |
| C | -2.28315900 | 3.44663400  | -0.60418700 |
| C | -3.47611200 | 2.04093400  | 0.93392000  |

|    |             |             |             |
|----|-------------|-------------|-------------|
| C  | -3.48204500 | 3.08662600  | 0.00792000  |
| H  | -2.27545900 | 4.25705900  | -1.33303800 |
| H  | -4.41004900 | 1.73101900  | 1.39875700  |
| C  | 0.19569500  | 3.16675100  | -1.01456300 |
| H  | 1.03537200  | 3.22333700  | -0.31667500 |
| H  | 0.45757400  | 2.42305800  | -1.77433000 |
| H  | 0.09027900  | 4.13445300  | -1.50953300 |
| C  | -4.77091200 | 3.79805300  | -0.31477500 |
| H  | -4.66517500 | 4.43264600  | -1.20007800 |
| H  | -5.57428700 | 3.08171900  | -0.50313900 |
| H  | -5.08623400 | 4.43259300  | 0.51891400  |
| C  | -2.31694200 | 0.20128200  | 2.22094400  |
| H  | -1.70449800 | -0.62603500 | 1.84372600  |
| H  | -1.90582600 | 0.49729900  | 3.19212600  |
| H  | -3.33896300 | -0.16658300 | 2.36006900  |
| C  | -1.92350500 | -1.23307400 | -1.00704400 |
| C  | -0.64686700 | -1.97956800 | -0.69560100 |
| C  | 0.05040300  | -0.85601400 | -1.57946900 |
| C  | -1.33154300 | -0.25761900 | -1.72670700 |
| H  | -0.36566300 | -2.07727800 | 0.35565300  |
| H  | -1.70138300 | 0.64524500  | -2.20449500 |
| O  | 0.96663800  | -1.00859600 | -2.38617400 |
| C  | -3.28767600 | -1.48717200 | -0.54547600 |
| C  | -3.57154600 | -2.61682900 | 0.23173300  |
| C  | -4.31783600 | -0.57916900 | -0.83539300 |
| C  | -4.85989900 | -2.83093600 | 0.71642400  |
| H  | -2.77914900 | -3.32773700 | 0.45460100  |
| C  | -5.59956100 | -0.79518500 | -0.35173100 |
| H  | -4.09372400 | 0.31010200  | -1.42461900 |
| C  | -5.87307000 | -1.92076400 | 0.42767300  |
| H  | -5.07039000 | -3.70522200 | 1.31890900  |
| H  | -6.38846800 | -0.07846000 | -0.57531900 |
| H  | -6.87556200 | -2.08241500 | 0.81182000  |
| Cl | -0.49663000 | -3.62840800 | -1.40910400 |
| C  | 3.23030800  | -1.31763000 | 2.79389400  |
| H  | 2.34866000  | -1.95492100 | 2.94653100  |
| H  | 3.97229700  | -1.61201500 | 3.54018300  |

### Si-TS1

Total energy= -1936.47681220

Sum of electronic and zero-point Energies= -1935.925198

Sum of electronic and thermal Energies= -1935.893656

Sum of electronic and thermal Enthalpies= -1935.892712

Sum of electronic and thermal Free Energies= -1935.990432

|   |             |             |             |
|---|-------------|-------------|-------------|
| C | -2.55069600 | -1.94336700 | -0.48463200 |
| C | -3.61463400 | -2.74528800 | -0.08523700 |
| C | -4.21964900 | -3.60757600 | -0.99728700 |
| C | -3.73567400 | -3.65678300 | -2.30239600 |
| C | -2.65407100 | -2.86226900 | -2.69204300 |
| C | -2.04644000 | -1.99816600 | -1.78374500 |
| C | -2.05073500 | -1.08649900 | 0.66032600  |
| C | -2.85130700 | -1.57968100 | 1.91817400  |
| C | -3.93791700 | -2.54948300 | 1.37295100  |
| H | -5.04890300 | -4.23978500 | -0.69318300 |
| H | -4.19449600 | -4.32803400 | -3.02156400 |

|    |             |             |             |
|----|-------------|-------------|-------------|
| H  | -2.27959000 | -2.92428200 | -3.70866500 |
| H  | -1.18827200 | -1.39798700 | -2.08337800 |
| H  | -3.33210100 | -0.71324300 | 2.37604100  |
| H  | -3.93006600 | -3.50385500 | 1.91237200  |
| H  | -2.23292300 | -0.02599700 | 0.47880700  |
| H  | -4.93898200 | -2.12622100 | 1.50233300  |
| C  | -0.04039800 | -2.26897000 | 1.50524500  |
| C  | 0.37493900  | -0.50141400 | 0.19035100  |
| N  | 1.25198600  | -2.25280000 | 1.38428300  |
| N  | -0.59982700 | -1.22437000 | 0.81104500  |
| N  | 1.48078800  | -1.16843700 | 0.56512100  |
| C  | -0.90394500 | -3.15161000 | 2.33532200  |
| H  | -1.38506300 | -3.90982900 | 1.70458800  |
| H  | -0.29099500 | -3.66765900 | 3.07573000  |
| C  | 2.84576600  | -0.86658600 | 0.24178000  |
| C  | 3.61676800  | -0.18018300 | 1.18347100  |
| C  | 3.37782700  | -1.36138600 | -0.95205800 |
| C  | 4.94499600  | 0.09117400  | 0.85776100  |
| C  | 4.71208000  | -1.06642200 | -1.23277900 |
| C  | 5.50254100  | -0.32840500 | -0.35089100 |
| H  | 5.56022000  | 0.63617100  | 1.57003700  |
| H  | 5.14711500  | -1.43719900 | -2.15785800 |
| C  | 3.05094900  | 0.19899500  | 2.52585900  |
| H  | 2.01643100  | 0.53920500  | 2.44206100  |
| H  | 3.06168200  | -0.66558800 | 3.19786700  |
| H  | 3.64414700  | 0.99346700  | 2.98357900  |
| C  | 6.92968000  | 0.01046900  | -0.69687400 |
| H  | 6.98402600  | 0.97961500  | -1.20358200 |
| H  | 7.55039000  | 0.07240500  | 0.20012000  |
| H  | 7.36195200  | -0.73631100 | -1.36692100 |
| C  | 2.55250100  | -2.22292000 | -1.86910700 |
| H  | 2.08882300  | -3.04184400 | -1.30979500 |
| H  | 1.75458400  | -1.63403700 | -2.32797200 |
| H  | 3.17887200  | -2.65135700 | -2.65403600 |
| C  | -0.91777800 | 2.47047600  | -0.85091400 |
| C  | 0.56049800  | 2.21216700  | -1.00223500 |
| C  | 0.11322400  | 0.78813900  | -1.53034300 |
| C  | -1.30378500 | 1.27134300  | -1.33063100 |
| H  | 1.05860600  | 2.77671000  | -1.79323400 |
| H  | -2.26485800 | 0.86224500  | -1.62856400 |
| O  | 0.59055000  | 0.15081700  | -2.46283500 |
| C  | -1.61891500 | 3.66854500  | -0.40043200 |
| C  | -0.92139400 | 4.86586900  | -0.20194100 |
| C  | -2.99950300 | 3.63139000  | -0.15990300 |
| C  | -1.59511200 | 6.00782800  | 0.22077200  |
| H  | 0.14917700  | 4.89940700  | -0.38135300 |
| C  | -3.66926700 | 4.77210400  | 0.26203400  |
| H  | -3.54094300 | 2.69981700  | -0.30040800 |
| C  | -2.96776700 | 5.96326600  | 0.45283200  |
| H  | -1.04819200 | 6.93287000  | 0.37062200  |
| H  | -4.73790600 | 4.73486600  | 0.44643000  |
| H  | -3.49171800 | 6.85384200  | 0.78464400  |
| Cl | 1.56356900  | 2.42465800  | 0.47212000  |
| C  | -1.95894900 | -2.24113000 | 2.98002400  |
| H  | -1.44344600 | -1.47447400 | 3.56766000  |
| H  | -2.58626800 | -2.81115000 | 3.67036200  |

**Re-M1**

Total energy= - 1936.50064372  
Sum of electronic and zero-point Energies= -1935.947522  
Sum of electronic and thermal Energies= -1935.916020  
Sum of electronic and thermal Enthalpies= -1935.915075  
Sum of electronic and thermal Free Energies= -1936.011639

|   |             |             |             |
|---|-------------|-------------|-------------|
| C | 3.76764100  | -0.30375500 | -0.49782800 |
| C | 5.01759000  | -0.62734900 | 0.01766700  |
| C | 6.16594700  | -0.06898300 | -0.53967600 |
| C | 6.03279300  | 0.81075800  | -1.61163100 |
| C | 4.77173600  | 1.12222600  | -2.12819500 |
| C | 3.62082900  | 0.56242400  | -1.57803200 |
| C | 2.66612800  | -1.00506600 | 0.27141500  |
| C | 3.38933500  | -1.64779000 | 1.50771000  |
| C | 4.90240100  | -1.60523600 | 1.15749100  |
| H | 7.14752900  | -0.31102500 | -0.14249800 |
| H | 6.91868600  | 1.25805700  | -2.05178400 |
| H | 4.69071000  | 1.80318800  | -2.96954300 |
| H | 2.62565800  | 0.75144600  | -1.97451200 |
| H | 3.05546200  | -2.68157800 | 1.61416500  |
| H | 5.50912400  | -1.31055100 | 2.02026200  |
| H | 2.14440100  | -1.73565600 | -0.35181500 |
| H | 5.25456000  | -2.59438100 | 0.84676200  |
| C | 1.85804900  | 0.84964600  | 1.73488500  |
| C | 0.47699600  | 0.28112000  | 0.13044000  |
| N | 0.87308200  | 1.69826500  | 1.82860800  |
| N | 1.65141300  | -0.02857100 | 0.70182700  |
| N | 0.02636800  | 1.32982800  | 0.81382300  |
| C | 3.01307500  | 0.61526400  | 2.64150800  |
| H | 3.93621900  | 0.99814800  | 2.19121000  |
| H | 2.84602500  | 1.14006200  | 3.58286300  |
| C | -1.13725200 | 2.10987600  | 0.49772800  |
| C | -1.04639600 | 2.99394200  | -0.57880300 |
| C | -2.30723400 | 1.90123300  | 1.22962200  |
| C | -2.19555800 | 3.71160900  | -0.90950000 |
| C | -3.42775500 | 2.64321700  | 0.86128100  |
| C | -3.38892300 | 3.54850200  | -0.20324400 |
| H | -2.15836000 | 4.40783300  | -1.74331400 |
| H | -4.35510300 | 2.50476000  | 1.41200100  |
| C | 0.22450500  | 3.10292800  | -1.37922400 |
| H | 1.08669800  | 3.28639500  | -0.72966700 |
| H | 0.41504600  | 2.16780500  | -1.92283100 |
| H | 0.15458600  | 3.91798900  | -2.10097800 |
| C | -4.62695800 | 4.31077700  | -0.59898600 |
| H | -4.37384800 | 5.21001200  | -1.16401100 |
| H | -5.27320000 | 3.69143700  | -1.22909200 |
| H | -5.20677900 | 4.60343600  | 0.27939400  |
| C | -2.35469800 | 0.87225500  | 2.32503400  |
| H | -2.22178300 | -0.13130900 | 1.90217500  |
| H | -1.55932500 | 1.03244600  | 3.05794200  |
| H | -3.31689300 | 0.89862300  | 2.83853500  |
| C | -1.99488700 | -1.37895000 | -0.70724600 |
| C | -0.60014700 | -1.90093400 | -0.51345200 |
| C | -0.10204800 | -0.44170700 | -1.09778600 |
| C | -1.62134300 | -0.19834800 | -1.22745300 |

|    |             |             |             |
|----|-------------|-------------|-------------|
| H  | -0.30879100 | -2.21389700 | 0.49542100  |
| H  | -2.18625400 | 0.64793500  | -1.61227900 |
| O  | 0.72190000  | -0.35091400 | -2.10115500 |
| C  | -3.28556400 | -1.96579300 | -0.34093900 |
| C  | -3.39207800 | -3.32635100 | -0.03234800 |
| C  | -4.42802100 | -1.15622100 | -0.26495400 |
| C  | -4.62131400 | -3.87107600 | 0.32881200  |
| H  | -2.50815300 | -3.95552300 | -0.08672400 |
| C  | -5.65368400 | -1.70250100 | 0.09387900  |
| H  | -4.33984500 | -0.09226600 | -0.47261500 |
| C  | -5.75401200 | -3.06262100 | 0.38956900  |
| H  | -4.69484500 | -4.92838600 | 0.56246700  |
| H  | -6.53253600 | -1.06804900 | 0.15016800  |
| H  | -6.71163400 | -3.48799100 | 0.67230500  |
| Cl | -0.11623100 | -3.24407400 | -1.60595900 |
| C  | 3.08544400  | -0.91173400 | 2.82734600  |
| H  | 2.12718100  | -1.25232600 | 3.23328600  |
| H  | 3.85254500  | -1.16491500 | 3.56288800  |

### Si-M1

Total energy= - 1936.49032817

Sum of electronic and zero-point Energies= -1935.936854

Sum of electronic and thermal Energies= -1935.905602

Sum of electronic and thermal Enthalpies= -1935.904658

Sum of electronic and thermal Free Energies= -1935.999792

|   |             |             |             |
|---|-------------|-------------|-------------|
| C | -3.11928500 | -1.08075900 | -0.50887300 |
| C | -4.33870100 | -1.63121200 | -0.12790500 |
| C | -5.15535300 | -2.23874100 | -1.07909600 |
| C | -4.72313000 | -2.29235700 | -2.40198700 |
| C | -3.48471000 | -1.75978600 | -2.77014900 |
| C | -2.66282600 | -1.14890300 | -1.82528800 |
| C | -2.40679900 | -0.46987000 | 0.67784900  |
| C | -3.29158800 | -0.82457200 | 1.92372200  |
| C | -4.57120500 | -1.49979300 | 1.35435300  |
| H | -6.10822700 | -2.67351800 | -0.79142300 |
| H | -5.34858500 | -2.76509200 | -3.15277400 |
| H | -3.15605100 | -1.82748100 | -3.80215600 |
| H | -1.68137200 | -0.76467100 | -2.10997200 |
| H | -3.56272200 | 0.11338500  | 2.41127600  |
| H | -4.74350100 | -2.48129300 | 1.81219900  |
| H | -2.30064500 | 0.61067500  | 0.58955600  |
| H | -5.45795100 | -0.89615800 | 1.56956700  |
| C | -0.75488200 | -2.18038400 | 1.42878800  |
| C | 0.08718300  | -0.60124400 | 0.14151200  |
| N | 0.48897600  | -2.51455200 | 1.25630300  |
| N | -1.03572300 | -1.00666300 | 0.77399000  |
| N | 0.99654700  | -1.53646600 | 0.44838400  |
| C | -1.79342600 | -2.83150800 | 2.26999300  |
| H | -2.45807600 | -3.43362400 | 1.63830800  |
| H | -1.30702200 | -3.49972900 | 2.98169800  |
| C | 2.38669900  | -1.62963200 | 0.07848800  |
| C | 3.34987200  | -1.29548600 | 1.03633400  |
| C | 2.71349600  | -2.19711200 | -1.15865600 |
| C | 4.68787400  | -1.38745400 | 0.65622900  |
| C | 4.06675100  | -2.27032400 | -1.48662500 |



|    |             |             |             |
|----|-------------|-------------|-------------|
| C  | 5.06316900  | -1.84413300 | -0.60755400 |
| H  | 5.45614400  | -1.11656500 | 1.37715200  |
| H  | 4.34882600  | -2.68971800 | -2.44895100 |
| C  | 2.99861700  | -0.96309400 | 2.46351500  |
| H  | 1.98070300  | -0.59012300 | 2.57161700  |
| H  | 3.09303000  | -1.86626400 | 3.07606600  |
| H  | 3.68475000  | -0.21228500 | 2.86132300  |
| C  | 6.51836500  | -1.90351100 | -0.99165400 |
| H  | 6.96079600  | -0.89882500 | -0.98476000 |
| H  | 7.08765900  | -2.51591100 | -0.28092700 |
| H  | 6.64904300  | -2.32500700 | -1.99344300 |
| C  | 1.65788400  | -2.78835200 | -2.05013900 |
| H  | 1.12970800  | -3.58948900 | -1.52113500 |
| H  | 0.93870500  | -2.01195300 | -2.32500900 |
| H  | 2.11272000  | -3.21375800 | -2.94679700 |
| C  | -0.04973000 | 2.59719500  | -0.53924200 |
| C  | 1.17570800  | 1.74056200  | -0.47874200 |
| C  | 0.23229700  | 0.50704300  | -0.94648700 |
| C  | -0.86198800 | 1.59844600  | -0.91961500 |
| H  | 1.94338600  | 1.91444100  | -1.23365800 |
| H  | -1.87138000 | 1.59273400  | -1.32658700 |
| O  | 0.47545700  | -0.04311000 | -2.10518500 |
| C  | -0.20165500 | 4.03719800  | -0.33368900 |
| C  | 0.92742900  | 4.85664100  | -0.22163400 |
| C  | -1.47502400 | 4.61538700  | -0.24705000 |
| C  | 0.78596700  | 6.22848300  | -0.03557700 |
| H  | 1.91759500  | 4.41428100  | -0.28469500 |
| C  | -1.61469700 | 5.98529500  | -0.06358900 |
| H  | -2.35408000 | 3.98039100  | -0.31671400 |
| C  | -0.48385000 | 6.79560300  | 0.04302900  |
| H  | 1.66808700  | 6.85530300  | 0.04639000  |
| H  | -2.60536400 | 6.42359300  | 0.00263800  |
| H  | -0.59418200 | 7.86515600  | 0.19036800  |
| Cl | 2.01675500  | 1.76771800  | 1.13333200  |
| C  | -2.57431100 | -1.70387300 | 2.95630300  |
| H  | -1.87645200 | -1.10177100 | 3.54715500  |
| H  | -3.31154400 | -2.11779500 | 3.64840300  |

## TS2

|                                              |                |              |
|----------------------------------------------|----------------|--------------|
| Total energy=                                | -1936.46452331 |              |
| Sum of electronic and zero-point Energies=   |                | -1935.915223 |
| Sum of electronic and thermal Energies=      |                | -1935.883029 |
| Sum of electronic and thermal Enthalpies=    |                | -1935.882085 |
| Sum of electronic and thermal Free Energies= |                | -1935.981097 |

|   |            |             |             |
|---|------------|-------------|-------------|
| C | 3.69251200 | -0.35591600 | -0.76060200 |
| C | 4.90063900 | -0.99480700 | -0.47331000 |
| C | 5.98655500 | -0.85709800 | -1.32898100 |
| C | 5.84917500 | -0.06155200 | -2.46700400 |
| C | 4.64384100 | 0.58538600  | -2.74101900 |
| C | 3.54832400 | 0.43889200  | -1.88939300 |
| C | 2.69379200 | -0.69951100 | 0.32824200  |
| C | 3.60313700 | -1.06790300 | 1.52425800  |
| C | 4.79680100 | -1.75602200 | 0.82877900  |
| H | 6.93001300 | -1.34827600 | -1.10943400 |
| H | 6.69039700 | 0.06297900  | -3.14156100 |

|    |             |             |             |
|----|-------------|-------------|-------------|
| H  | 4.55685600  | 1.20698500  | -3.62631900 |
| H  | 2.60128500  | 0.91959700  | -2.10926400 |
| H  | 3.08094600  | -1.73189600 | 2.22029700  |
| H  | 5.70921600  | -1.70821300 | 1.43009200  |
| H  | 2.05888700  | -1.54658100 | 0.03312800  |
| H  | 4.57649700  | -2.81325900 | 0.64119600  |
| C  | 1.82739700  | 1.16393100  | 1.81004200  |
| C  | 0.59141800  | 0.65606000  | 0.07565200  |
| N  | 0.79112500  | 1.95327000  | 1.88741500  |
| N  | 1.76265600  | 0.37777900  | 0.68431900  |
| N  | 0.03143300  | 1.62128500  | 0.80203900  |
| C  | 2.90865600  | 1.00781600  | 2.82464800  |
| H  | 3.22757500  | 1.99507300  | 3.16531900  |
| H  | 2.47320100  | 0.49172700  | 3.68753900  |
| C  | -1.17055700 | 2.32967400  | 0.47328600  |
| C  | -1.14546100 | 3.19220400  | -0.62411400 |
| C  | -2.31728800 | 2.09062500  | 1.23896300  |
| C  | -2.33366400 | 3.85057700  | -0.94519900 |
| C  | -3.47285300 | 2.77725200  | 0.88064200  |
| C  | -3.49959100 | 3.65713700  | -0.20606100 |
| H  | -2.34292800 | 4.53283400  | -1.79108100 |
| H  | -4.38069900 | 2.61370500  | 1.45616500  |
| C  | 0.10352600  | 3.39330300  | -1.44340600 |
| H  | 0.99144200  | 3.47515700  | -0.80976300 |
| H  | 0.26209900  | 2.55503200  | -2.13178800 |
| H  | 0.02304800  | 4.30195000  | -2.04173500 |
| C  | -4.77739900 | 4.36648800  | -0.57062500 |
| H  | -5.21892400 | 4.84885300  | 0.30552700  |
| H  | -4.60634300 | 5.12707300  | -1.33453300 |
| H  | -5.51411800 | 3.65604000  | -0.95769700 |
| C  | -2.31145500 | 1.08401900  | 2.35665000  |
| H  | -1.47720600 | 1.24793800  | 3.04323300  |
| H  | -3.24390100 | 1.13388400  | 2.92065500  |
| H  | -2.21510800 | 0.07175400  | 1.94418400  |
| C  | -1.80579700 | -1.53580700 | -0.33400800 |
| C  | -0.72487300 | -1.92597600 | 0.51783900  |
| C  | -0.03400800 | -0.15739900 | -1.03153800 |
| C  | -1.50683200 | -0.36041000 | -0.97082100 |
| H  | -0.47863500 | -1.33808400 | 1.39356500  |
| H  | -2.22409000 | 0.39253600  | -1.28989600 |
| O  | 0.71147800  | -0.55898300 | -1.92221500 |
| C  | -3.11640000 | -2.21529300 | -0.47841800 |
| C  | -3.69450600 | -2.90442800 | 0.59473000  |
| C  | -3.81998600 | -2.12761500 | -1.68405500 |
| C  | -4.95140000 | -3.48552800 | 0.46473500  |
| H  | -3.15129900 | -2.96637000 | 1.53327200  |
| C  | -5.08020300 | -2.70431700 | -1.81413500 |
| H  | -3.35763200 | -1.61247200 | -2.52127700 |
| C  | -5.64771100 | -3.38609300 | -0.73983700 |
| H  | -5.39309900 | -4.01286700 | 1.30460000  |
| H  | -5.61550900 | -2.62982200 | -2.75562300 |
| H  | -6.62780900 | -3.84168300 | -0.84093800 |
| Cl | -0.43356100 | -3.65801600 | 0.85299600  |
| C  | 4.07310000  | 0.19788100  | 2.25385800  |
| H  | 4.74651500  | -0.08356900 | 3.06698800  |
| H  | 4.64820900  | 0.81834900  | 1.55673600  |

**M2**

Total energy= -1936.53058424  
Sum of electronic and zero-point Energies= -1935.977009  
Sum of electronic and thermal Energies= -1935.944814  
Sum of electronic and thermal Enthalpies= -1935.943869  
Sum of electronic and thermal Free Energies= -1936.043191

|   |             |             |             |
|---|-------------|-------------|-------------|
| C | -2.52025800 | -2.03743300 | 0.71484200  |
| C | -3.60239400 | -2.88158800 | 0.49591500  |
| C | -4.43404300 | -3.23377200 | 1.55741300  |
| C | -4.16178300 | -2.72310200 | 2.82358300  |
| C | -3.07665200 | -1.86639700 | 3.03165500  |
| C | -2.24019100 | -1.51369300 | 1.97564900  |
| C | -1.75388500 | -1.79208600 | -0.56598300 |
| C | -2.55885300 | -2.54097200 | -1.68290800 |
| C | -3.70827800 | -3.28914400 | -0.94986700 |
| H | -5.28312700 | -3.89204700 | 1.39837800  |
| H | -4.80167600 | -2.98849300 | 3.65914400  |
| H | -2.88460800 | -1.47340800 | 4.02465000  |
| H | -1.40115800 | -0.83652000 | 2.13197200  |
| H | -1.88783100 | -3.26619200 | -2.14616100 |
| H | -4.68779700 | -3.02398200 | -1.36511900 |
| H | -0.72104900 | -2.13906100 | -0.49538200 |
| H | -3.60385400 | -4.37189900 | -1.06658800 |
| C | -2.63706400 | 0.38046800  | -1.47537600 |
| C | -0.77538000 | 0.53227100  | -0.33130100 |
| N | -2.38190300 | 1.65777500  | -1.40940400 |
| N | -1.66586300 | -0.34271900 | -0.82882800 |
| N | -1.22738700 | 1.73097300  | -0.68244400 |
| C | -3.71900100 | -0.33944400 | -2.19785600 |
| H | -4.52507100 | -0.59528900 | -1.49963200 |
| H | -4.13416600 | 0.31455900  | -2.96569500 |
| C | -0.59309600 | 2.99479100  | -0.42324500 |
| C | 0.36274400  | 3.44826900  | -1.33150000 |
| C | -0.97115800 | 3.69985100  | 0.72052700  |
| C | 0.95366700  | 4.68349100  | -1.06801100 |
| C | -0.35281200 | 4.92837100  | 0.93831900  |
| C | 0.60919100  | 5.43210500  | 0.05836900  |
| H | 1.70038800  | 5.06671700  | -1.75850600 |
| H | -0.62443500 | 5.50444200  | 1.81934000  |
| C | 0.74289100  | 2.61971600  | -2.52955400 |
| H | 1.23696300  | 1.69489400  | -2.21117000 |
| H | -0.13882800 | 2.34155000  | -3.11496600 |
| H | 1.42843000  | 3.16900500  | -3.17617900 |
| C | 1.28148600  | 6.75030900  | 0.34190500  |
| H | 2.07751200  | 6.62249900  | 1.08226000  |
| H | 1.72921500  | 7.16938900  | -0.56145500 |
| H | 0.57090900  | 7.47522600  | 0.74613900  |
| C | -1.98125500 | 3.12198600  | 1.67266400  |
| H | -2.92729100 | 2.91122500  | 1.16422900  |
| H | -1.59233600 | 2.18050700  | 2.07533800  |
| H | -2.17550600 | 3.81166000  | 2.49525200  |
| C | 2.64845400  | -0.91811500 | 0.57196300  |
| C | 2.96603300  | -0.53014300 | 1.82347200  |
| C | 0.42972700  | 0.25961000  | 0.54410900  |
| C | 1.40122100  | -0.50844200 | -0.06001000 |

|    |             |             |             |
|----|-------------|-------------|-------------|
| H  | 2.32865400  | 0.10986000  | 2.41370500  |
| H  | 1.24774700  | -0.81108500 | -1.09152400 |
| O  | 0.35989100  | 0.76541300  | 1.70071400  |
| C  | 3.52839400  | -1.80133600 | -0.24890600 |
| C  | 4.86450100  | -1.47041800 | -0.49635500 |
| C  | 3.00583800  | -2.96443400 | -0.82431300 |
| C  | 5.66135800  | -2.28879100 | -1.29171300 |
| H  | 5.27334100  | -0.56113500 | -0.06695200 |
| C  | 3.80390900  | -3.78860300 | -1.61320500 |
| H  | 1.96761600  | -3.22640300 | -0.63822500 |
| C  | 5.13468800  | -3.45200200 | -1.84983400 |
| H  | 6.69508500  | -2.01574100 | -1.47954100 |
| H  | 3.38643000  | -4.69400900 | -2.04255200 |
| H  | 5.75743700  | -4.09049100 | -2.46834100 |
| Cl | 4.39916800  | -1.06927600 | 2.67946700  |
| C  | -3.08493300 | -1.60895700 | -2.78576600 |
| H  | -2.26945000 | -1.31685900 | -3.45536400 |
| H  | -3.81884700 | -2.15092800 | -3.38705500 |

### TS3RR

Total energy= -2814.52204318

Sum of electronic and zero-point Energies= -2813.681448

Sum of electronic and thermal Energies= -2813.632520

Sum of electronic and thermal Enthalpies= -2813.631575

Sum of electronic and thermal Free Energies= -2813.762381

|   |             |             |             |
|---|-------------|-------------|-------------|
| C | -4.43582800 | 0.17930700  | -0.69971200 |
| C | -5.78498100 | 0.06391800  | -0.36766700 |
| C | -6.76650300 | 0.22550800  | -1.34251500 |
| C | -6.38155400 | 0.49503200  | -2.65248700 |
| C | -5.02983500 | 0.59889200  | -2.98636500 |
| C | -4.04660300 | 0.44151000  | -2.01296200 |
| C | -3.55897800 | -0.04244900 | 0.51785200  |
| C | -4.56626700 | -0.17997300 | 1.70846200  |
| C | -5.98083200 | -0.26243000 | 1.08733000  |
| H | -7.81738200 | 0.13874000  | -1.08274300 |
| H | -7.13676300 | 0.62430200  | -3.42104400 |
| H | -4.74104900 | 0.80809500  | -4.01094500 |
| H | -3.00060500 | 0.53033200  | -2.28764700 |
| H | -4.48724900 | 0.75798400  | 2.26256600  |
| H | -6.42396500 | -1.25878300 | 1.20339400  |
| H | -2.87099600 | 0.76963700  | 0.74356000  |
| H | -6.66242400 | 0.43837800  | 1.57746300  |
| C | -2.93061900 | -2.43841100 | 0.96887500  |
| C | -1.50898500 | -1.35509200 | -0.29623000 |
| N | -1.97733500 | -3.28850000 | 0.71666600  |
| N | -2.68538700 | -1.23512200 | 0.35863100  |
| N | -1.10748700 | -2.61037800 | -0.07555200 |
| C | -4.08176500 | -2.63606800 | 1.88531900  |
| H | -4.98196900 | -2.88010800 | 1.31149000  |
| H | -3.85875400 | -3.48507500 | 2.53276600  |
| C | 0.15668500  | -3.26162400 | -0.33695400 |
| C | 1.07140300  | -3.30063100 | 0.71926400  |
| C | 0.34720500  | -3.92919600 | -1.54752500 |
| C | 2.26258000  | -3.99083400 | 0.50134100  |
| C | 1.55902200  | -4.59859700 | -1.71518300 |

|    |             |             |             |
|----|-------------|-------------|-------------|
| C  | 2.52729700  | -4.63182400 | -0.70858500 |
| H  | 3.00373900  | -4.01961300 | 1.29711500  |
| H  | 1.74563200  | -5.11464700 | -2.65364300 |
| C  | 0.79164400  | -2.63648200 | 2.04123500  |
| H  | 1.61370200  | -1.96094200 | 2.29244500  |
| H  | -0.12965100 | -2.05732300 | 2.05322100  |
| H  | 0.73084700  | -3.39403600 | 2.83010400  |
| C  | 3.83164900  | -5.35874000 | -0.91020100 |
| H  | 3.97473300  | -5.63383900 | -1.95750500 |
| H  | 4.67305900  | -4.73266700 | -0.60027100 |
| H  | 3.86382100  | -6.27483500 | -0.31221200 |
| C  | -0.71449900 | -3.93581100 | -2.61156600 |
| H  | -1.67864700 | -4.24652000 | -2.19686200 |
| H  | -0.83470200 | -2.93270200 | -3.02747000 |
| H  | -0.44850000 | -4.62580700 | -3.41396100 |
| C  | 0.02879100  | 1.97842500  | -1.42430000 |
| C  | 1.30314100  | 1.54458400  | -1.87434100 |
| C  | -0.71177700 | -0.39447700 | -1.18550800 |
| C  | -0.86843500 | 1.02672400  | -0.98958900 |
| H  | 1.35863300  | 0.64409300  | -2.46511300 |
| H  | -1.72196800 | 1.38536100  | -0.43678700 |
| O  | -0.06126500 | -0.94818500 | -2.06963700 |
| C  | -0.29673600 | 3.39882700  | -1.11305300 |
| C  | -0.70092900 | 3.75294600  | 0.17967900  |
| C  | -0.27511000 | 4.37854900  | -2.11009200 |
| C  | -1.07271300 | 5.06189100  | 0.46809900  |
| H  | -0.69500000 | 2.99493400  | 0.95889500  |
| C  | -0.65142400 | 5.68730000  | -1.82107800 |
| H  | 0.02610400  | 4.10924700  | -3.11754500 |
| C  | -1.04953300 | 6.03250500  | -0.53159600 |
| H  | -1.37413800 | 5.32634300  | 1.47691700  |
| H  | -0.63654700 | 6.43711100  | -2.60590500 |
| H  | -1.33843100 | 7.05429100  | -0.30616900 |
| Cl | 2.47428400  | 2.72520600  | -2.47898200 |
| C  | -4.26070000 | -1.33106400 | 2.66639000  |
| H  | -3.34399600 | -1.12096300 | 3.22765700  |
| H  | -5.07659700 | -1.42908400 | 3.38693000  |
| C  | 4.30483300  | 0.56967700  | -0.54676200 |
| C  | 3.12286800  | -0.15497300 | -0.75185100 |
| C  | 3.14049600  | -1.35972700 | -1.42789200 |
| C  | 4.36882100  | -1.84309300 | -1.89449800 |
| C  | 5.53992500  | -1.11547600 | -1.68799900 |
| C  | 5.52846700  | 0.10986700  | -1.00970400 |
| C  | 2.67901100  | 1.86879300  | 0.42368900  |
| C  | 2.01661200  | 0.61304500  | -0.13467300 |
| H  | 2.20895500  | -1.89375500 | -1.59831600 |
| H  | 4.40484900  | -2.78665600 | -2.43105100 |
| H  | 6.48325100  | -1.49989700 | -2.06322800 |
| H  | 6.44265100  | 0.67263400  | -0.85188900 |
| N  | 4.02645400  | 1.74370400  | 0.16606100  |
| O  | 2.14422000  | 2.81995900  | 0.96174200  |
| N  | 0.98167700  | 0.01437800  | 0.45989600  |
| C  | 4.98463700  | 2.79261000  | 0.42051500  |
| H  | 4.46188400  | 3.59048500  | 0.94777900  |
| H  | 5.80740100  | 2.42320700  | 1.03926600  |
| H  | 5.38803700  | 3.18083100  | -0.52033400 |
| C  | 0.52225400  | 0.36032900  | 1.69228400  |

|   |             |             |            |
|---|-------------|-------------|------------|
| O | -0.64976900 | 0.25590200  | 2.05211200 |
| O | 1.53898600  | 0.66430300  | 2.53061300 |
| C | 1.38130700  | 0.93460900  | 3.94370100 |
| C | 0.15417500  | 1.78716800  | 4.25966000 |
| C | 1.38654800  | -0.39786700 | 4.68858200 |
| C | 2.64689200  | 1.72647100  | 4.26761700 |
| H | 0.11933500  | 2.64399000  | 3.57993600 |
| H | -0.77166300 | 1.22396400  | 4.16417300 |
| H | 0.24770100  | 2.16257300  | 5.28320000 |
| H | 2.34082700  | -0.90708600 | 4.52101400 |
| H | 1.27364900  | -0.22894400 | 5.76365400 |
| H | 0.59118200  | -1.06762500 | 4.35099900 |
| H | 2.68907100  | 1.95662900  | 5.33561800 |
| H | 3.53323600  | 1.14598200  | 3.99666000 |
| H | 2.65310400  | 2.65696100  | 3.69391600 |

### TS3RS

|                                              |                |  |              |
|----------------------------------------------|----------------|--|--------------|
| Total energy=                                | -2814.52077583 |  |              |
| Sum of electronic and zero-point Energies=   |                |  | -2813.680511 |
| Sum of electronic and thermal Energies=      |                |  | -2813.630153 |
| Sum of electronic and thermal Enthalpies=    |                |  | -2813.629209 |
| Sum of electronic and thermal Free Energies= |                |  | -2813.765791 |

|   |             |             |             |
|---|-------------|-------------|-------------|
| C | -2.15551600 | 3.27960400  | -0.33662100 |
| C | -2.48869600 | 4.48345100  | 0.27610000  |
| C | -2.96930000 | 5.54707300  | -0.48424300 |
| C | -3.12265600 | 5.38299700  | -1.85781900 |
| C | -2.81545900 | 4.16368900  | -2.46621500 |
| C | -2.33425400 | 3.10045300  | -1.70777400 |
| C | -1.64375800 | 2.27679900  | 0.67767900  |
| C | -1.81239300 | 2.97740700  | 2.07126100  |
| C | -2.29713100 | 4.42162300  | 1.76775400  |
| H | -3.23002000 | 6.48836800  | -0.00922700 |
| H | -3.49685100 | 6.20434600  | -2.46044200 |
| H | -2.95817700 | 4.04115300  | -3.53476800 |
| H | -2.11754000 | 2.14682600  | -2.18281100 |
| H | -0.82033000 | 3.01241700  | 2.52284200  |
| H | -3.23469100 | 4.64948500  | 2.28959200  |
| H | -0.59835200 | 2.00521500  | 0.54736900  |
| H | -1.56433900 | 5.15931300  | 2.10869200  |
| C | -3.53592600 | 0.78186500  | 1.27562900  |
| C | -2.13018500 | -0.10573900 | -0.14424700 |
| N | -4.00300000 | -0.41076300 | 1.03344200  |
| N | -2.39202700 | 1.01078800  | 0.56623900  |
| N | -3.12899800 | -0.94624100 | 0.14392300  |
| C | -4.00442300 | 1.76249200  | 2.28768300  |
| H | -4.50813300 | 2.60534300  | 1.79877700  |
| H | -4.72213600 | 1.26860500  | 2.94383400  |
| C | -3.41769300 | -2.28593900 | -0.31840500 |
| C | -2.73471100 | -3.36239800 | 0.24019900  |
| C | -4.44790400 | -2.42171200 | -1.25229200 |
| C | -3.13311200 | -4.63701600 | -0.16952300 |
| C | -4.79925200 | -3.71302000 | -1.63098600 |
| C | -4.15624200 | -4.83167900 | -1.09391000 |
| H | -2.61700600 | -5.49879300 | 0.24629900  |
| H | -5.59195800 | -3.85003600 | -2.36253300 |

|    |             |             |             |
|----|-------------|-------------|-------------|
| C  | -1.57855500 | -3.18108100 | 1.18144300  |
| H  | -0.64228400 | -3.15252300 | 0.61207900  |
| H  | -1.63596800 | -2.24349400 | 1.74196100  |
| H  | -1.53103700 | -4.01205200 | 1.88898100  |
| C  | -4.57801900 | -6.21853800 | -1.50620300 |
| H  | -5.57653400 | -6.45077100 | -1.12240800 |
| H  | -4.61761200 | -6.30877200 | -2.59521100 |
| H  | -3.88634500 | -6.97212700 | -1.12470800 |
| C  | -5.13237500 | -1.21286100 | -1.83341100 |
| H  | -5.66916400 | -0.65320900 | -1.06181000 |
| H  | -4.40460800 | -0.53253700 | -2.28874700 |
| H  | -5.84615900 | -1.51106200 | -2.60279300 |
| C  | 1.24042300  | 0.24052500  | -1.97190600 |
| C  | 1.73908900  | -1.07928700 | -1.91527700 |
| C  | -0.98626300 | -0.49308700 | -1.08155100 |
| C  | 0.00477600  | 0.50333400  | -1.39170000 |
| H  | 1.02627000  | -1.88858400 | -1.86560700 |
| H  | -0.23629100 | 1.54107900  | -1.21863900 |
| O  | -1.07274500 | -1.62730000 | -1.53614200 |
| C  | 2.02135100  | 1.40551600  | -2.47256900 |
| C  | 3.41070200  | 1.52187400  | -2.32450500 |
| C  | 1.33267900  | 2.44889500  | -3.10977300 |
| C  | 4.07766000  | 2.65573700  | -2.77714000 |
| H  | 3.97262500  | 0.73656600  | -1.83493900 |
| C  | 2.00211600  | 3.57736300  | -3.56914300 |
| H  | 0.26121400  | 2.36138500  | -3.26423800 |
| C  | 3.37979500  | 3.68741200  | -3.39955000 |
| H  | 5.15144300  | 2.73021800  | -2.63603500 |
| H  | 1.44702000  | 4.36766700  | -4.06439100 |
| H  | 3.90620200  | 4.56776000  | -3.75468200 |
| Cl | 3.12961800  | -1.55784000 | -2.88232900 |
| C  | -2.74409800 | 2.23136700  | 3.02905500  |
| H  | -2.22531400 | 1.35727800  | 3.43439800  |
| H  | -3.01197000 | 2.88822900  | 3.86083400  |
| C  | 4.38322200  | -1.40395800 | 0.20557100  |
| C  | 3.31713400  | -0.52144200 | 0.42750000  |
| C  | 3.55497900  | 0.80289300  | 0.75267500  |
| C  | 4.87724400  | 1.24704000  | 0.83401400  |
| C  | 5.93039900  | 0.36676300  | 0.58137300  |
| C  | 5.70246500  | -0.97609700 | 0.26198600  |
| C  | 2.51274000  | -2.71038300 | -0.03675100 |
| C  | 2.06631800  | -1.28129000 | 0.23595200  |
| H  | 2.72104900  | 1.48140000  | 0.91497700  |
| H  | 5.08746700  | 2.28267800  | 1.07921000  |
| H  | 6.95263100  | 0.72737100  | 0.63745700  |
| H  | 6.52645200  | -1.65721500 | 0.07708100  |
| N  | 3.89331100  | -2.69039300 | -0.03378500 |
| O  | 1.81989100  | -3.69147600 | -0.22458900 |
| N  | 0.87626000  | -1.03431300 | 0.76513000  |
| C  | 4.70358400  | -3.82372200 | -0.40961300 |
| H  | 4.03071800  | -4.67044300 | -0.54618100 |
| H  | 5.23226100  | -3.62290500 | -1.34739400 |
| H  | 5.43062700  | -4.05566900 | 0.37389400  |
| C  | 0.68728800  | -0.36316600 | 1.92172800  |
| O  | -0.35709100 | 0.20849100  | 2.24073700  |
| O  | 1.73545300  | -0.48658700 | 2.77653500  |
| C  | 1.72883300  | 0.10948500  | 4.09407800  |

|   |             |             |            |
|---|-------------|-------------|------------|
| C | 1.53101400  | 1.62085400  | 4.01351300 |
| C | 0.66956400  | -0.55750400 | 4.96666100 |
| C | 3.13119300  | -0.20634700 | 4.60587600 |
| H | 2.24387400  | 2.05222000  | 3.30362800 |
| H | 0.51547700  | 1.85798800  | 3.69809800 |
| H | 1.71338000  | 2.06570300  | 4.99606200 |
| H | 0.84268600  | -1.63670100 | 5.00392200 |
| H | 0.72883800  | -0.16236900 | 5.98525900 |
| H | -0.32813500 | -0.37070300 | 4.56748000 |
| H | 3.26520300  | 0.19292900  | 5.61492900 |
| H | 3.28986800  | -1.28746300 | 4.62962700 |
| H | 3.87935800  | 0.23910900  | 3.94329100 |

### TS3SR

Total energy= -2814.52785028

Sum of electronic and zero-point Energies= -2813.685584

Sum of electronic and thermal Energies= -2813.636126

Sum of electronic and thermal Enthalpies= -2813.635182

Sum of electronic and thermal Free Energies= -2813.766809

|   |            |             |             |
|---|------------|-------------|-------------|
| C | 3.27796000 | -2.49317900 | -0.91912500 |
| C | 3.81874100 | -3.68007700 | -0.43597600 |
| C | 4.88700900 | -4.28331800 | -1.09424000 |
| C | 5.39768800 | -3.67961700 | -2.24081000 |
| C | 4.83908900 | -2.49586900 | -2.73196200 |
| C | 3.76831000 | -1.89453800 | -2.07431000 |
| C | 2.13945900 | -2.02699800 | -0.03790100 |
| C | 2.22936100 | -2.92708000 | 1.23463800  |
| C | 3.07732200 | -4.14917300 | 0.79059000  |
| H | 5.31496600 | -5.20881500 | -0.72093600 |
| H | 6.23460200 | -4.13366300 | -2.76106400 |
| H | 5.24058400 | -2.04358200 | -3.63443400 |
| H | 3.30426300 | -0.98769900 | -2.45832800 |
| H | 1.21273100 | -3.23126100 | 1.49943400  |
| H | 3.75010500 | -4.49224500 | 1.58617800  |
| H | 1.16869700 | -2.12105600 | -0.52517900 |
| H | 2.42792800 | -4.99391200 | 0.53355500  |
| C | 3.25172600 | -0.16155100 | 1.19307800  |
| C | 1.74785900 | 0.47582400  | -0.23579400 |
| N | 3.30833800 | 1.14443400  | 1.20930300  |
| N | 2.32158000 | -0.60379500 | 0.29406000  |
| N | 2.36156300 | 1.52823800  | 0.29885600  |
| C | 3.92221400 | -1.17007600 | 2.05682500  |
| H | 4.73511300 | -1.65532500 | 1.50337300  |
| H | 4.35209300 | -0.67177100 | 2.92865800  |
| C | 2.32039700 | 2.87566300  | -0.21045900 |
| C | 1.59066500 | 3.85346100  | 0.45927100  |
| C | 3.03645300 | 3.12779600  | -1.38949700 |
| C | 1.60503000 | 5.14240400  | -0.07452300 |
| C | 3.01932100 | 4.42773200  | -1.88051300 |
| C | 2.31064800 | 5.44869100  | -1.23566400 |
| H | 1.03717300 | 5.92287800  | 0.42642200  |
| H | 3.57004700 | 4.65489100  | -2.79111000 |
| C | 0.79298300 | 3.53666800  | 1.69140600  |
| H | 0.66898200 | 2.45919700  | 1.81713900  |
| H | 1.28326100 | 3.92363500  | 2.59106200  |



|    |             |             |             |
|----|-------------|-------------|-------------|
| H  | -0.19880200 | 3.99464900  | 1.62729500  |
| C  | 2.29745500  | 6.84032800  | -1.81179000 |
| H  | 3.30573300  | 7.15466500  | -2.09954700 |
| H  | 1.66947000  | 6.87637200  | -2.70975400 |
| H  | 1.90232200  | 7.56263700  | -1.09221100 |
| C  | 3.76364600  | 2.02322700  | -2.10833200 |
| H  | 4.33095200  | 1.39356700  | -1.41789500 |
| H  | 3.05499600  | 1.38180300  | -2.64255000 |
| H  | 4.45912400  | 2.43661800  | -2.84249400 |
| C  | -1.80928200 | 0.94505700  | -1.33960900 |
| C  | -2.09091300 | -0.35267400 | -1.84531200 |
| C  | 0.61532400  | 0.40309600  | -1.22983500 |
| C  | -0.52085200 | 1.23015700  | -0.92981500 |
| H  | -1.30364500 | -0.86098000 | -2.37939200 |
| H  | -0.34921300 | 2.11543800  | -0.32572800 |
| O  | 0.78442700  | -0.39435800 | -2.14715000 |
| C  | -2.86596000 | 1.94673600  | -1.02140800 |
| C  | -3.67742400 | 2.46652700  | -2.03274900 |
| C  | -2.99624000 | 2.44824700  | 0.28061000  |
| C  | -4.60081600 | 3.46748800  | -1.75253700 |
| H  | -3.57232300 | 2.09433300  | -3.04578100 |
| C  | -3.93125400 | 3.44207100  | 0.56182800  |
| H  | -2.39540700 | 2.02248300  | 1.08056600  |
| C  | -4.73397300 | 3.95747100  | -0.45354900 |
| H  | -5.22198400 | 3.86665000  | -2.54984700 |
| H  | -4.03352600 | 3.81178100  | 1.57804700  |
| H  | -5.46065600 | 4.73263100  | -0.23520600 |
| Cl | -3.64763000 | -0.69156600 | -2.58938400 |
| C  | 2.83126700  | -2.19188200 | 2.44488500  |
| H  | 2.02367200  | -1.64776300 | 2.93924700  |
| H  | 3.23492900  | -2.91574700 | 3.15581300  |
| C  | -3.74336000 | -2.86728600 | -0.25947800 |
| C  | -3.32362900 | -1.65128600 | 0.31109200  |
| C  | -4.29515500 | -0.84178000 | 0.89060800  |
| C  | -5.62036000 | -1.27972100 | 0.94738500  |
| C  | -5.99313100 | -2.51248600 | 0.42175900  |
| C  | -5.05024200 | -3.32765200 | -0.20442900 |
| C  | -1.53495400 | -2.76519900 | -0.82183900 |
| C  | -1.87060500 | -1.49447600 | -0.03666500 |
| H  | -4.02586600 | 0.12100900  | 1.29623400  |
| H  | -6.36740300 | -0.64269200 | 1.41040700  |
| H  | -7.02659100 | -2.84153700 | 0.48005800  |
| H  | -5.32994300 | -4.27668800 | -0.64917600 |
| N  | -2.68094800 | -3.50643500 | -0.90371600 |
| O  | -0.45912900 | -3.09755600 | -1.28865700 |
| N  | -0.80755200 | -1.03641900 | 0.65996100  |
| C  | -2.78708100 | -4.73722600 | -1.64909000 |
| H  | -1.80310300 | -4.94790900 | -2.06670500 |
| H  | -3.09134700 | -5.56040400 | -0.99601000 |
| H  | -3.51645300 | -4.63078800 | -2.45875500 |
| C  | -1.02712000 | -0.27825700 | 1.76920000  |
| O  | -2.09170600 | 0.05400100  | 2.27195500  |
| O  | 0.15876100  | 0.08639700  | 2.37899700  |
| C  | 0.10582300  | 0.45333800  | 3.79065200  |
| C  | -0.83788900 | 1.62661700  | 4.10378200  |
| C  | -0.29819200 | -0.77868100 | 4.59938100  |
| C  | 1.53874700  | 0.86514200  | 4.12645100  |

|   |             |             |            |
|---|-------------|-------------|------------|
| H | -0.82854200 | 2.36330600  | 3.29866300 |
| H | -1.86386000 | 1.29184700  | 4.24207100 |
| H | -0.49097200 | 2.11700200  | 5.02044600 |
| H | 0.41532700  | -1.59695800 | 4.45481100 |
| H | -0.32343800 | -0.53064400 | 5.66522500 |
| H | -1.29473400 | -1.11461600 | 4.30039400 |
| H | 1.60629500  | 1.10044500  | 5.19067600 |
| H | 2.24739600  | 0.06556600  | 3.91084700 |
| H | 1.84067600  | 1.74727500  | 3.55721500 |

### TS3SS

|                                              |                |  |              |
|----------------------------------------------|----------------|--|--------------|
| Total energy=                                | -2814.52605517 |  |              |
| Sum of electronic and zero-point Energies=   |                |  | -2813.685712 |
| Sum of electronic and thermal Energies=      |                |  | -2813.635661 |
| Sum of electronic and thermal Enthalpies=    |                |  | -2813.634717 |
| Sum of electronic and thermal Free Energies= |                |  | -2813.769866 |

|   |             |             |             |
|---|-------------|-------------|-------------|
| C | -4.26405600 | -0.01905700 | 1.69665800  |
| C | -5.63824800 | -0.24578200 | 1.69693100  |
| C | -6.43215000 | 0.24938600  | 2.72941900  |
| C | -5.83359600 | 0.97759700  | 3.75341000  |
| C | -4.45505800 | 1.20567100  | 3.74895300  |
| C | -3.65873900 | 0.70745400  | 2.72145600  |
| C | -3.60898000 | -0.63077300 | 0.47394600  |
| C | -4.77000800 | -1.36887100 | -0.27154100 |
| C | -6.07763900 | -1.03158100 | 0.49155300  |
| H | -7.50368500 | 0.07214700  | 2.73225900  |
| H | -6.44125700 | 1.36952400  | 4.56293400  |
| H | -3.99927500 | 1.76962600  | 4.55632500  |
| H | -2.58611800 | 0.86741500  | 2.72717300  |
| H | -4.56792800 | -2.43650300 | -0.15973400 |
| H | -6.77159900 | -0.44667400 | -0.12445500 |
| H | -2.79260000 | -1.30665700 | 0.71474500  |
| H | -6.61076200 | -1.94387000 | 0.77399000  |
| C | -3.58844500 | 0.99071400  | -1.44824400 |
| C | -1.76757800 | 1.00444200  | -0.24505200 |
| N | -2.83288400 | 1.91245200  | -1.98379800 |
| N | -2.98370600 | 0.43190500  | -0.35952100 |
| N | -1.71459900 | 1.91818200  | -1.22010800 |
| C | -4.87515700 | 0.46960200  | -1.97580200 |
| H | -5.71506000 | 0.93222700  | -1.44584600 |
| H | -4.95149300 | 0.74647000  | -3.02817300 |
| C | -0.70304700 | 2.90890600  | -1.48655500 |
| C | 0.29898000  | 2.61078400  | -2.40935200 |
| C | -0.75054800 | 4.09085700  | -0.74277400 |
| C | 1.32207000  | 3.54912600  | -2.54718800 |
| C | 0.29289500  | 4.99548800  | -0.92212500 |
| C | 1.34495300  | 4.72960900  | -1.80315300 |
| H | 2.13193000  | 3.33961900  | -3.24115900 |
| H | 0.29436600  | 5.91819800  | -0.34717400 |
| C | 0.31724900  | 1.29925200  | -3.14062600 |
| H | 0.67580200  | 0.51101700  | -2.46522000 |
| H | -0.68204500 | 1.02009300  | -3.48474200 |
| H | 0.98501900  | 1.35544900  | -4.00217600 |
| C | 2.50880800  | 5.67821900  | -1.91265100 |
| H | 2.21424500  | 6.70047400  | -1.66522600 |

|    |             |             |             |
|----|-------------|-------------|-------------|
| H  | 3.29751100  | 5.37723100  | -1.21382400 |
| H  | 2.93484600  | 5.67002500  | -2.91833400 |
| C  | -1.83957700 | 4.32684700  | 0.26996900  |
| H  | -2.83007200 | 4.13466800  | -0.15241600 |
| H  | -1.71463700 | 3.66295200  | 1.13442200  |
| H  | -1.81034900 | 5.35543900  | 0.63173200  |
| C  | 1.75172400  | 0.88241500  | 1.26825000  |
| C  | 1.92395400  | -0.49623800 | 1.59996100  |
| C  | -0.68160000 | 0.54973500  | 0.72977800  |
| C  | 0.55266800  | 1.27984000  | 0.70774800  |
| H  | 1.02508200  | -1.02191400 | 1.88738900  |
| H  | 0.56619700  | 2.22018700  | 0.18344400  |
| O  | -1.00542800 | -0.36997900 | 1.48256900  |
| C  | 2.83422000  | 1.90305800  | 1.31272300  |
| C  | 4.18996100  | 1.60255700  | 1.11740100  |
| C  | 2.48110900  | 3.24413100  | 1.52836900  |
| C  | 5.14850200  | 2.60972800  | 1.11435100  |
| H  | 4.50042800  | 0.57916500  | 0.95041600  |
| C  | 3.43946500  | 4.25173900  | 1.52485100  |
| H  | 1.44213600  | 3.49820200  | 1.71580300  |
| C  | 4.77997000  | 3.93840500  | 1.31300200  |
| H  | 6.18989100  | 2.35309900  | 0.94740000  |
| H  | 3.13700900  | 5.28058800  | 1.69507800  |
| H  | 5.53179800  | 4.72140800  | 1.30969000  |
| Cl | 3.22379100  | -0.95179800 | 2.71651100  |
| C  | -4.85676600 | -1.04917300 | -1.76420400 |
| H  | -3.99210100 | -1.47330800 | -2.28747400 |
| H  | -5.76085600 | -1.49965100 | -2.18176400 |
| C  | 3.80949700  | -2.82098900 | 0.21156900  |
| C  | 2.41222100  | -2.77888400 | 0.33184300  |
| C  | 1.75170700  | -3.80106200 | 0.99572200  |
| C  | 2.49011400  | -4.87945200 | 1.48827600  |
| C  | 3.87523000  | -4.92207000 | 1.32653900  |
| C  | 4.56018100  | -3.88632700 | 0.68777800  |
| C  | 3.23713600  | -0.83323800 | -0.76615400 |
| C  | 1.96368600  | -1.46900700 | -0.22198100 |
| H  | 0.67419000  | -3.76103000 | 1.12161000  |
| H  | 1.98220300  | -5.69042800 | 1.99960700  |
| H  | 4.43478300  | -5.76924600 | 1.71037100  |
| H  | 5.63952100  | -3.90840000 | 0.57972700  |
| N  | 4.28034500  | -1.66069400 | -0.41247300 |
| O  | 3.33342100  | 0.19886000  | -1.40211800 |
| N  | 0.84772600  | -1.10730500 | -0.86281500 |
| C  | 5.66586800  | -1.38687900 | -0.71414100 |
| H  | 5.70637700  | -0.40719700 | -1.19210000 |
| H  | 6.26170600  | -1.37177600 | 0.20380700  |
| H  | 6.07438200  | -2.14015100 | -1.39444600 |
| C  | -0.19505900 | -1.90196800 | -1.17940200 |
| O  | -1.31833200 | -1.46753400 | -1.44160500 |
| O  | 0.11017900  | -3.22077500 | -1.29852900 |
| C  | -0.88613600 | -4.19430400 | -1.69502200 |
| C  | -2.05509700 | -4.21067100 | -0.71272700 |
| C  | -1.34754700 | -3.92901700 | -3.12568300 |
| C  | -0.12146000 | -5.51313200 | -1.62285800 |
| H  | -1.68427500 | -4.31781600 | 0.31176600  |
| H  | -2.63286600 | -3.28954800 | -0.78854600 |
| H  | -2.70406400 | -5.06333100 | -0.93350100 |

|   |             |             |             |
|---|-------------|-------------|-------------|
| H | -0.48274300 | -3.89742900 | -3.79479500 |
| H | -2.00711700 | -4.73813900 | -3.45324600 |
| H | -1.88276600 | -2.98168400 | -3.19059500 |
| H | -0.76952900 | -6.34022200 | -1.92488400 |
| H | 0.74613400  | -5.48412200 | -2.28746400 |
| H | 0.23226500  | -5.69443400 | -0.60395700 |

### M3RR

|                                              |                |  |              |
|----------------------------------------------|----------------|--|--------------|
| Total energy=                                | -2814.56929848 |  |              |
| Sum of electronic and zero-point Energies=   |                |  | -2813.725997 |
| Sum of electronic and thermal Energies=      |                |  | -2813.676451 |
| Sum of electronic and thermal Enthalpies=    |                |  | -2813.675507 |
| Sum of electronic and thermal Free Energies= |                |  | -2813.809276 |

|   |             |             |             |
|---|-------------|-------------|-------------|
| C | -1.13100300 | 3.10992400  | 1.45818500  |
| C | -0.63042700 | 3.87620100  | 2.50936100  |
| C | -0.91158100 | 5.23623700  | 2.57660800  |
| C | -1.70829300 | 5.81073400  | 1.58556700  |
| C | -2.22540100 | 5.03428100  | 0.54806400  |
| C | -1.94130000 | 3.67031900  | 0.47784900  |
| C | -0.64581900 | 1.68031400  | 1.59591900  |
| C | -0.24300900 | 1.56841200  | 3.09694700  |
| C | 0.18094100  | 3.01593700  | 3.44847400  |
| H | -0.52944900 | 5.84007200  | 3.39436800  |
| H | -1.94135700 | 6.86975500  | 1.62984300  |
| H | -2.85938200 | 5.49101500  | -0.20462700 |
| H | -2.37121800 | 3.06293200  | -0.31416100 |
| H | 0.60650400  | 0.88696700  | 3.18652400  |
| H | 0.01129600  | 3.25526200  | 4.50208900  |
| H | 0.21650300  | 1.49420100  | 0.94775400  |
| H | 1.25063800  | 3.15212800  | 3.25068900  |
| C | -2.79020600 | 0.54662700  | 2.04821600  |
| C | -1.75847200 | -0.20115900 | 0.27280200  |
| N | -3.57876400 | -0.36720000 | 1.55674400  |
| N | -1.68834500 | 0.71231200  | 1.25284200  |
| N | -2.92853000 | -0.80641300 | 0.42981700  |
| C | -2.80810300 | 1.23899200  | 3.36464700  |
| H | -3.02710300 | 2.30355100  | 3.23592300  |
| H | -3.58325000 | 0.79813300  | 3.99263700  |
| C | -3.63212000 | -1.70429900 | -0.45460600 |
| C | -3.45219400 | -3.07847800 | -0.33123200 |
| C | -4.52488700 | -1.12603900 | -1.36010000 |
| C | -4.22714000 | -3.89733500 | -1.15362600 |
| C | -5.27391800 | -1.98416800 | -2.16062700 |
| C | -5.14121000 | -3.37177000 | -2.06644300 |
| H | -4.10499800 | -4.97517000 | -1.08033000 |
| H | -5.97501400 | -1.56031000 | -2.87570500 |
| C | -2.41601600 | -3.63815900 | 0.59824900  |
| H | -1.42719400 | -3.36995200 | 0.21257000  |
| H | -2.49079200 | -3.20272100 | 1.59793600  |
| H | -2.50417000 | -4.72388700 | 0.66911300  |
| C | -5.96924800 | -4.27308200 | -2.94604000 |
| H | -5.76753600 | -4.07662800 | -4.00312600 |
| H | -5.75513500 | -5.32515100 | -2.74835100 |
| H | -7.03760800 | -4.10471400 | -2.78162100 |
| C | -4.63085400 | 0.37054800  | -1.48742100 |

|    |             |             |             |
|----|-------------|-------------|-------------|
| H  | -4.81934800 | 0.84419500  | -0.51916500 |
| H  | -3.69681800 | 0.78394900  | -1.88518700 |
| H  | -5.43700900 | 0.64455000  | -2.16934300 |
| C  | 0.67912200  | 1.08679700  | -2.16309400 |
| C  | 1.60103200  | -0.11111300 | -2.17808900 |
| C  | -0.69723200 | -0.49319200 | -0.81521700 |
| C  | -0.45447100 | 0.86492700  | -1.49850600 |
| H  | 1.11348800  | -0.92510000 | -2.71575500 |
| H  | -1.22636700 | 1.62974800  | -1.46095500 |
| O  | -0.97800800 | -1.49616800 | -1.57608900 |
| C  | 0.96237700  | 2.39608900  | -2.79817800 |
| C  | 0.87481700  | 3.55157400  | -2.01393500 |
| C  | 1.24513400  | 2.52076600  | -4.16348300 |
| C  | 1.05630500  | 4.80921100  | -2.58332200 |
| H  | 0.67665000  | 3.45176700  | -0.95026700 |
| C  | 1.42702900  | 3.77779700  | -4.73055700 |
| H  | 1.30433100  | 1.63127600  | -4.78287000 |
| C  | 1.33280800  | 4.92476100  | -3.94290600 |
| H  | 0.98618200  | 5.69642900  | -1.96175900 |
| H  | 1.63698900  | 3.86316100  | -5.79198600 |
| H  | 1.47632300  | 5.90368600  | -4.38917200 |
| Cl | 3.16379200  | 0.18334400  | -3.01910800 |
| C  | -1.40041800 | 1.02537400  | 3.96919400  |
| H  | -1.26191700 | -0.05298000 | 4.09596800  |
| H  | -1.35739900 | 1.47856800  | 4.96262000  |
| C  | 3.92768800  | -1.74281800 | -0.37362300 |
| C  | 2.61853500  | -1.94555500 | -0.81437100 |
| C  | 2.18999300  | -3.17766900 | -1.25863200 |
| C  | 3.11055400  | -4.23517300 | -1.25861900 |
| C  | 4.41731000  | -4.02783000 | -0.82280600 |
| C  | 4.85313100  | -2.77408600 | -0.37071700 |
| C  | 2.91430900  | 0.28331300  | -0.03848900 |
| C  | 1.87516000  | -0.63748300 | -0.72955700 |
| H  | 1.15790000  | -3.29944900 | -1.58149300 |
| H  | 2.80540900  | -5.21916200 | -1.59749700 |
| H  | 5.11978200  | -4.85509100 | -0.83003300 |
| H  | 5.87177500  | -2.62392400 | -0.02794900 |
| N  | 4.08824500  | -0.41741900 | 0.05679300  |
| O  | 2.71708500  | 1.42594600  | 0.32705200  |
| N  | 0.62568800  | -0.68704200 | 0.02324300  |
| C  | 5.30982600  | 0.12792600  | 0.60269300  |
| H  | 5.11595100  | 1.16757200  | 0.86587700  |
| H  | 5.61352700  | -0.42373700 | 1.49780800  |
| H  | 6.11232300  | 0.08124200  | -0.13859300 |
| C  | 0.61525400  | -1.27060900 | 1.25829700  |
| O  | -0.39034000 | -1.65163100 | 1.84261400  |
| O  | 1.84752600  | -1.30245000 | 1.80230400  |
| C  | 2.15784000  | -2.19855200 | 2.91315600  |
| C  | 1.36838100  | -1.83052500 | 4.16660400  |
| C  | 1.91001900  | -3.63582900 | 2.47058000  |
| C  | 3.64441400  | -1.95151000 | 3.14188700  |
| H  | 1.51966200  | -0.77482400 | 4.41281600  |
| H  | 0.30480800  | -2.02337200 | 4.03736700  |
| H  | 1.74120200  | -2.42691200 | 5.00448600  |
| H  | 2.49162800  | -3.85243400 | 1.56835400  |
| H  | 2.22358200  | -4.32091500 | 3.26333500  |
| H  | 0.85043400  | -3.80270000 | 2.26438700  |

|   |            |             |            |
|---|------------|-------------|------------|
| H | 3.98799800 | -2.53619000 | 3.99903600 |
| H | 4.21971500 | -2.24944500 | 2.26122300 |
| H | 3.82390600 | -0.89123600 | 3.34432800 |

### M3RS

|                                              |                |  |              |
|----------------------------------------------|----------------|--|--------------|
| Total energy=                                | -2814.56476683 |  |              |
| Sum of electronic and zero-point Energies=   |                |  | -2813.721144 |
| Sum of electronic and thermal Energies=      |                |  | -2813.671701 |
| Sum of electronic and thermal Enthalpies=    |                |  | -2813.670756 |
| Sum of electronic and thermal Free Energies= |                |  | -2813.804090 |

|   |             |             |             |
|---|-------------|-------------|-------------|
| C | 0.42631100  | 1.38802500  | 2.99778900  |
| C | 1.21031500  | 1.17637000  | 4.13049900  |
| C | 1.65654000  | 2.25764200  | 4.88221700  |
| C | 1.30089300  | 3.54711800  | 4.48579400  |
| C | 0.51154300  | 3.75283800  | 3.35374600  |
| C | 0.06731100  | 2.66919000  | 2.59578500  |
| C | 0.11329300  | 0.05953900  | 2.34030700  |
| C | 0.38327400  | -0.99132000 | 3.46123800  |
| C | 1.45947500  | -0.29840000 | 4.33215500  |
| H | 2.26248700  | 2.10106200  | 5.76985700  |
| H | 1.63406400  | 4.39998900  | 5.06838900  |
| H | 0.23723700  | 4.76138300  | 3.06302000  |
| H | -0.55713000 | 2.83007100  | 1.72172600  |
| H | 0.78391400  | -1.89955900 | 3.00683500  |
| H | 1.40820200  | -0.60433100 | 5.38079700  |
| H | 0.77593400  | -0.10937700 | 1.49129600  |
| H | 2.46068900  | -0.55665400 | 3.96640600  |
| C | -2.31229900 | -0.14462600 | 2.70403300  |
| C | -1.74176400 | -0.11925000 | 0.58738800  |
| N | -3.43218300 | -0.25889800 | 2.05116500  |
| N | -1.25782000 | -0.01857700 | 1.83914500  |
| N | -3.05997400 | -0.21676500 | 0.73058500  |
| C | -2.02367900 | -0.31206900 | 4.15203400  |
| H | -1.70680700 | 0.63952700  | 4.59093800  |
| H | -2.92784400 | -0.64580600 | 4.66248600  |
| C | -4.12155100 | -0.20811900 | -0.24939500 |
| C | -4.52725100 | -1.41484700 | -0.81945000 |
| C | -4.75240900 | 1.00800500  | -0.50163500 |
| C | -5.62252700 | -1.37494100 | -1.67788900 |
| C | -5.84453100 | 0.99636700  | -1.37052200 |
| C | -6.29545900 | -0.18320800 | -1.96039700 |
| H | -5.95565100 | -2.29922500 | -2.14413400 |
| H | -6.35145900 | 1.93315400  | -1.58855400 |
| C | -3.75561800 | -2.67563700 | -0.56298400 |
| H | -2.76294600 | -2.56431600 | -1.01015400 |
| H | -3.60715500 | -2.84608300 | 0.50749300  |
| H | -4.26647100 | -3.53862900 | -0.99390000 |
| C | -7.49891100 | -0.18199600 | -2.86775400 |
| H | -8.40181900 | -0.45773000 | -2.31315700 |
| H | -7.66484300 | 0.80548100  | -3.30381800 |
| H | -7.37951100 | -0.90333500 | -3.67966400 |
| C | -4.24564100 | 2.29389300  | 0.09678300  |
| H | -4.01382500 | 2.18419800  | 1.16006300  |
| H | -3.33245600 | 2.61614100  | -0.41603700 |
| H | -4.98639400 | 3.08741600  | -0.01441200 |

|    |             |             |             |
|----|-------------|-------------|-------------|
| C  | 0.48210500  | 1.73337800  | -1.72069600 |
| C  | 1.04974900  | 0.52713800  | -2.44064700 |
| C  | -1.01965300 | -0.02809200 | -0.79154100 |
| C  | -0.50911900 | 1.41910100  | -0.88373600 |
| H  | 0.25935800  | 0.08274000  | -3.05070800 |
| H  | -1.03368800 | 2.19647900  | -0.33362800 |
| O  | -1.76585600 | -0.41395200 | -1.76502700 |
| C  | 0.91799600  | 3.13694900  | -1.92148000 |
| C  | 2.25749700  | 3.52273900  | -1.78027200 |
| C  | -0.04427400 | 4.11851700  | -2.18614600 |
| C  | 2.61926300  | 4.86059200  | -1.89850700 |
| H  | 3.01283700  | 2.77348800  | -1.56437500 |
| C  | 0.32076900  | 5.45639000  | -2.30658600 |
| H  | -1.08117900 | 3.82033200  | -2.31189800 |
| C  | 1.65409600  | 5.83077900  | -2.16328400 |
| H  | 3.65945800  | 5.14677500  | -1.77980700 |
| H  | -0.43686300 | 6.20450800  | -2.51701500 |
| H  | 1.94134600  | 6.87301700  | -2.25849300 |
| Cl | 2.39269000  | 0.89730200  | -3.57396400 |
| C  | -0.90030100 | -1.36819400 | 4.23915000  |
| H  | -1.29870700 | -2.30130800 | 3.82877300  |
| H  | -0.65532000 | -1.55579800 | 5.28727200  |
| C  | 3.77223100  | -0.96284200 | -1.05217700 |
| C  | 2.70150500  | -0.17171900 | -0.62041400 |
| C  | 2.89680200  | 0.79069400  | 0.35442500  |
| C  | 4.17461600  | 0.94153600  | 0.91013500  |
| C  | 5.22807600  | 0.14379600  | 0.47289600  |
| C  | 5.04632000  | -0.82247100 | -0.52346600 |
| C  | 1.99768400  | -1.75975400 | -2.25784200 |
| C  | 1.47163600  | -0.56125100 | -1.41388500 |
| H  | 2.07979000  | 1.43456200  | 0.67149000  |
| H  | 4.33963900  | 1.68861900  | 1.67900700  |
| H  | 6.21406600  | 0.27249800  | 0.90763500  |
| H  | 5.87300000  | -1.43514900 | -0.86674900 |
| N  | 3.34640600  | -1.85779800 | -2.03886500 |
| O  | 1.33940600  | -2.42761100 | -3.02687800 |
| N  | 0.29221200  | -0.88869900 | -0.61097200 |
| C  | 4.21981300  | -2.73937900 | -2.77832900 |
| H  | 3.59530600  | -3.34395000 | -3.43639700 |
| H  | 4.92739200  | -2.15934200 | -3.37828700 |
| H  | 4.77377900  | -3.39395100 | -2.09902800 |
| C  | 0.19565400  | -2.10153500 | 0.00819600  |
| O  | -0.79940200 | -2.49324800 | 0.60416200  |
| O  | 1.35420300  | -2.78033400 | -0.03965700 |
| C  | 1.39202300  | -4.20867200 | 0.26561000  |
| C  | 1.25205500  | -4.41549300 | 1.76869200  |
| C  | 0.32392800  | -4.95310000 | -0.53081200 |
| C  | 2.77991800  | -4.61435300 | -0.21481300 |
| H  | 2.03735600  | -3.86770200 | 2.29904700  |
| H  | 0.27376300  | -4.07735900 | 2.11364900  |
| H  | 1.36028500  | -5.47895300 | 2.00069500  |
| H  | 0.36689300  | -4.64009600 | -1.57826900 |
| H  | 0.52790000  | -6.02629700 | -0.47906900 |
| H  | -0.67560700 | -4.76236800 | -0.14048000 |
| H  | 2.98387400  | -5.65030800 | 0.06740400  |
| H  | 2.83575500  | -4.53012300 | -1.30355100 |
| H  | 3.54212400  | -3.96745900 | 0.23121800  |

**M3SR**

Total energy= -2814.57630451  
Sum of electronic and zero-point Energies= -2813.731484  
Sum of electronic and thermal Energies= -2813.682768  
Sum of electronic and thermal Enthalpies= -2813.681824  
Sum of electronic and thermal Free Energies= -2813.811828

|   |             |             |             |
|---|-------------|-------------|-------------|
| C | -4.57312200 | -0.52733300 | -1.14610000 |
| C | -5.94006100 | -0.27229700 | -1.12969600 |
| C | -6.82760700 | -1.17706900 | -1.71034500 |
| C | -6.32226500 | -2.33249400 | -2.30052700 |
| C | -4.94600400 | -2.57848300 | -2.32026400 |
| C | -4.05672800 | -1.67385900 | -1.74606200 |
| C | -3.79823500 | 0.58004100  | -0.46644500 |
| C | -4.89156200 | 1.55834400  | 0.09490700  |
| C | -6.25092100 | 1.03532100  | -0.45118200 |
| H | -7.89669800 | -0.98465200 | -1.70136800 |
| H | -7.00300200 | -3.04698900 | -2.75306200 |
| H | -4.56818700 | -3.47901400 | -2.79418100 |
| H | -2.98056800 | -1.81561800 | -1.78293100 |
| H | -4.68370200 | 2.54945700  | -0.31261700 |
| H | -6.98540100 | 0.90603400  | 0.35281300  |
| H | -3.10246600 | 1.06599800  | -1.14566900 |
| H | -6.68603900 | 1.74837200  | -1.15825900 |
| C | -3.40329700 | -0.17989500 | 1.88261400  |
| C | -1.63370900 | -0.27194400 | 0.59868600  |
| N | -2.45258200 | -0.61174500 | 2.66140900  |
| N | -2.94389400 | 0.02615200  | 0.61035100  |
| N | -1.35799700 | -0.67709700 | 1.84182900  |
| C | -4.76645400 | 0.27217400  | 2.25964300  |
| H | -5.52584400 | -0.41417300 | 1.86730500  |
| H | -4.84570100 | 0.29143500  | 3.34707700  |
| C | -0.12553600 | -1.12584000 | 2.43963600  |
| C | 0.71323600  | -0.18062400 | 3.03723100  |
| C | 0.10402200  | -2.50534900 | 2.53994800  |
| C | 1.83893600  | -0.65263800 | 3.71523300  |
| C | 1.25994600  | -2.91961900 | 3.19832000  |
| C | 2.13977100  | -2.00984200 | 3.79037300  |
| H | 2.50675200  | 0.07074700  | 4.17697300  |
| H | 1.46431800  | -3.98630200 | 3.26977200  |
| C | 0.47286800  | 1.30028900  | 2.94503500  |
| H | 1.16674600  | 1.73664500  | 2.21653500  |
| H | -0.54353600 | 1.54375600  | 2.62987400  |
| H | 0.66255900  | 1.77568900  | 3.91055100  |
| C | 3.38446700  | -2.49628000 | 4.48508700  |
| H | 3.14962000  | -3.28426200 | 5.20565900  |
| H | 4.08884300  | -2.91662200 | 3.76017000  |
| H | 3.88633100  | -1.68312300 | 5.01321400  |
| C | -0.84579800 | -3.54317600 | 1.99752800  |
| H | -1.19080100 | -4.19029800 | 2.80810900  |
| H | -1.72578600 | -3.10744000 | 1.52132200  |
| H | -0.33550100 | -4.17884700 | 1.26563000  |
| C | 1.18242200  | -1.66757300 | -1.41436400 |
| C | 1.56170400  | -0.38953400 | -2.13028000 |
| C | -0.72365500 | -0.25489100 | -0.68051800 |



|    |             |             |             |
|----|-------------|-------------|-------------|
| C  | 0.08428200  | -1.55462100 | -0.66467500 |
| H  | 0.80767500  | -0.14872000 | -2.88318900 |
| H  | -0.34712000 | -2.42897200 | -0.18816100 |
| O  | -1.42008500 | -0.10014000 | -1.76569000 |
| C  | 1.89415800  | -2.96176800 | -1.54438800 |
| C  | 2.20360400  | -3.52153600 | -2.79023100 |
| C  | 2.19939300  | -3.68546600 | -0.38569900 |
| C  | 2.80012800  | -4.77560400 | -2.86973500 |
| H  | 1.96030500  | -2.97890400 | -3.69792900 |
| C  | 2.79553400  | -4.94110000 | -0.46649000 |
| H  | 1.97677700  | -3.24785200 | 0.58455600  |
| C  | 3.09897300  | -5.48913000 | -1.70966800 |
| H  | 3.02645200  | -5.20078100 | -3.84241200 |
| H  | 3.02932900  | -5.48573700 | 0.44312800  |
| H  | 3.56634500  | -6.46627900 | -1.77742800 |
| Cl | 3.13476100  | -0.47908000 | -3.00307900 |
| C  | -4.90807900 | 1.66468500  | 1.62474500  |
| H  | -4.08064400 | 2.29262500  | 1.97201700  |
| H  | -5.83872700 | 2.13954200  | 1.94544100  |
| C  | 3.67385000  | 1.79192200  | -0.59954800 |
| C  | 2.79894400  | 0.77002600  | -0.21635300 |
| C  | 3.13538900  | -0.08740400 | 0.81170800  |
| C  | 4.35393300  | 0.10563700  | 1.47662200  |
| C  | 5.21268400  | 1.13039600  | 1.08946700  |
| C  | 4.88851500  | 1.99340700  | 0.03595500  |
| C  | 1.88891600  | 2.05972500  | -2.00433300 |
| C  | 1.59382300  | 0.80482500  | -1.12686100 |
| H  | 2.46192600  | -0.88897400 | 1.10074700  |
| H  | 4.62816700  | -0.55155800 | 2.29610900  |
| H  | 6.15617900  | 1.26535000  | 1.60862600  |
| H  | 5.56480700  | 2.78416600  | -0.27064400 |
| N  | 3.13519400  | 2.51476700  | -1.67072500 |
| O  | 1.16725100  | 2.49406400  | -2.87820500 |
| N  | 0.30486900  | 0.87290200  | -0.42907800 |
| C  | 3.83558600  | 3.54985000  | -2.39494800 |
| H  | 3.14895700  | 3.95275100  | -3.13976300 |
| H  | 4.15061000  | 4.34908900  | -1.71759100 |
| H  | 4.71600200  | 3.13484300  | -2.89508000 |
| C  | -0.18873600 | 2.08306200  | -0.02574700 |
| O  | -1.35084800 | 2.27888300  | 0.30112500  |
| O  | 0.77685400  | 3.01266800  | 0.04172900  |
| C  | 0.44786500  | 4.41688600  | 0.27174100  |
| C  | -0.59147700 | 4.89732300  | -0.73709900 |
| C  | -0.00459300 | 4.60518500  | 1.71489800  |
| C  | 1.77980200  | 5.11414400  | 0.02310900  |
| H  | -0.29069000 | 4.59147800  | -1.74336200 |
| H  | -1.57886900 | 4.49027600  | -0.52111400 |
| H  | -0.63837900 | 5.98954700  | -0.70273300 |
| H  | 0.76870900  | 4.25297400  | 2.40416900  |
| H  | -0.17446000 | 5.66917700  | 1.90327400  |
| H  | -0.93109000 | 4.06164900  | 1.90389300  |
| H  | 1.70400900  | 6.16965200  | 0.29620600  |
| H  | 2.57135000  | 4.64767400  | 0.61798100  |
| H  | 2.04552000  | 5.04466000  | -1.03506700 |

### M3SS

Total energy= -2814.57678988

|                                              |              |
|----------------------------------------------|--------------|
| Sum of electronic and zero-point Energies=   | -2813.731428 |
| Sum of electronic and thermal Energies=      | -2813.682725 |
| Sum of electronic and thermal Enthalpies=    | -2813.681781 |
| Sum of electronic and thermal Free Energies= | -2813.811344 |

|   |             |             |             |
|---|-------------|-------------|-------------|
| C | -4.39762500 | -0.32647700 | -1.36290700 |
| C | -5.75965100 | -0.04783200 | -1.32947600 |
| C | -6.62860400 | -0.70217400 | -2.20064900 |
| C | -6.10975100 | -1.63369800 | -3.09648100 |
| C | -4.73800000 | -1.90327900 | -3.12921700 |
| C | -3.86660600 | -1.24785200 | -2.26352600 |
| C | -3.64367400 | 0.49353800  | -0.33935800 |
| C | -4.74843600 | 1.29157300  | 0.43965300  |
| C | -6.08746400 | 0.99333200  | -0.29275000 |
| H | -7.69387700 | -0.49043800 | -2.18046000 |
| H | -6.77577100 | -2.15261400 | -3.77903500 |
| H | -4.34980300 | -2.62445200 | -3.84153800 |
| H | -2.79200500 | -1.40540300 | -2.28949000 |
| H | -4.50591500 | 2.35251200  | 0.35403000  |
| H | -6.85575200 | 0.63688100  | 0.40409400  |
| H | -2.90143200 | 1.13913700  | -0.80337900 |
| H | -6.48760000 | 1.89920400  | -0.75864900 |
| C | -3.38257100 | -0.94801400 | 1.69201700  |
| C | -1.55811200 | -0.69700100 | 0.51423100  |
| N | -2.47364100 | -1.61662800 | 2.34504700  |
| N | -2.86269300 | -0.38832200 | 0.55643300  |
| N | -1.34390600 | -1.45913100 | 1.59303200  |
| C | -4.75259900 | -0.58086700 | 2.13066700  |
| H | -5.50657700 | -1.09531700 | 1.52342400  |
| H | -4.88451500 | -0.87855400 | 3.17143100  |
| C | -0.14619000 | -2.17245700 | 1.95867300  |
| C | 0.89613300  | -1.51120900 | 2.59985500  |
| C | -0.08937300 | -3.53280500 | 1.61071100  |
| C | 2.08132000  | -2.23079200 | 2.79406900  |
| C | 1.10377000  | -4.20337600 | 1.83608000  |
| C | 2.21067300  | -3.55803500 | 2.40406700  |
| H | 2.92030700  | -1.72415300 | 3.26431900  |
| H | 1.18185100  | -5.25061500 | 1.55411300  |
| C | 0.78792100  | -0.10319900 | 3.11532500  |
| H | 1.51932200  | 0.53664100  | 2.61497100  |
| H | -0.20954200 | 0.31657800  | 2.96875000  |
| H | 1.00440100  | -0.09231400 | 4.18798500  |
| C | 3.50715300  | -4.30282700 | 2.58197300  |
| H | 3.34241700  | -5.26734900 | 3.07020900  |
| H | 3.96514500  | -4.49983600 | 1.60723000  |
| H | 4.21622600  | -3.72750600 | 3.18045000  |
| C | -1.27936300 | -4.22653300 | 1.00002800  |
| H | -2.09001900 | -4.31759900 | 1.72903600  |
| H | -1.68424600 | -3.67201300 | 0.14512900  |
| H | -1.00553100 | -5.22575600 | 0.65861900  |
| C | 1.55378700  | -1.34937200 | -1.39311800 |
| C | 1.82515200  | 0.06209700  | -1.85637300 |
| C | -0.56294400 | -0.28969700 | -0.63344000 |
| C | 0.34515900  | -1.50347300 | -0.85756500 |
| H | 1.11287500  | 0.27794000  | -2.65428100 |
| H | -0.00929800 | -2.49364600 | -0.59900000 |
| O | -1.17536300 | 0.14345500  | -1.69935400 |

|    |             |             |             |
|----|-------------|-------------|-------------|
| C  | 2.48800300  | -2.49027100 | -1.55078100 |
| C  | 3.73838900  | -2.46436300 | -0.92036000 |
| C  | 2.09644600  | -3.63953900 | -2.24272500 |
| C  | 4.58185500  | -3.56805200 | -0.99484100 |
| H  | 4.02770700  | -1.58396500 | -0.35328400 |
| C  | 2.94103200  | -4.74594700 | -2.31000300 |
| H  | 1.12689800  | -3.65849100 | -2.73223700 |
| C  | 4.18605100  | -4.71214700 | -1.68841800 |
| H  | 5.54804300  | -3.53985600 | -0.49979200 |
| H  | 2.62685800  | -5.63168600 | -2.85324400 |
| H  | 4.84623400  | -5.57197900 | -1.74256300 |
| Cl | 3.44758600  | 0.30063600  | -2.59910700 |
| C  | -4.83513100 | 0.94182800  | 1.92997300  |
| H  | -4.01067500 | 1.41133100  | 2.47664300  |
| H  | -5.76998100 | 1.33216900  | 2.33986600  |
| C  | 2.64277900  | 3.21644100  | -1.02074700 |
| C  | 1.50827000  | 2.49431300  | -1.39513000 |
| C  | 0.55476500  | 3.03664600  | -2.23006300 |
| C  | 0.76056200  | 4.33877700  | -2.70838900 |
| C  | 1.90055600  | 5.05044500  | -2.34248800 |
| C  | 2.86639800  | 4.50218100  | -1.48653400 |
| C  | 2.83417400  | 1.24914300  | 0.13906300  |
| C  | 1.56825700  | 1.12952900  | -0.75134600 |
| H  | -0.32836400 | 2.45179600  | -2.47872300 |
| H  | 0.02937000  | 4.79493100  | -3.36698700 |
| H  | 2.04838500  | 6.05555300  | -2.72436100 |
| H  | 3.74791600  | 5.06623500  | -1.19969000 |
| N  | 3.41686800  | 2.45956100  | -0.13038200 |
| O  | 3.25943900  | 0.40021700  | 0.89945500  |
| N  | 0.37416300  | 0.76111900  | 0.01945500  |
| C  | 4.66729300  | 2.89432600  | 0.44765400  |
| H  | 5.00949600  | 2.10697200  | 1.11896700  |
| H  | 5.41367300  | 3.05843400  | -0.33475300 |
| H  | 4.52944200  | 3.82074200  | 1.01364600  |
| C  | -0.16382100 | 1.73214500  | 0.82539800  |
| O  | -1.33904700 | 1.79959500  | 1.15644100  |
| O  | 0.78989200  | 2.56468600  | 1.26942800  |
| C  | 0.45767100  | 3.78491100  | 1.99654200  |
| C  | -0.41531900 | 4.67597500  | 1.11964500  |
| C  | -0.19364700 | 3.44671100  | 3.33362300  |
| C  | 1.82347900  | 4.42421000  | 2.21937500  |
| H  | 0.07051600  | 4.82908100  | 0.14982900  |
| H  | -1.39831100 | 4.22963900  | 0.96225000  |
| H  | -0.54141600 | 5.64827200  | 1.60425800  |
| H  | 0.45152600  | 2.77239000  | 3.90529700  |
| H  | -0.32098000 | 4.36783300  | 3.90983900  |
| H  | -1.16638000 | 2.97710100  | 3.19110000  |
| H  | 1.71586500  | 5.32673300  | 2.82634000  |
| H  | 2.48696100  | 3.72591700  | 2.73905000  |
| H  | 2.27368800  | 4.69789900  | 1.26094700  |

#### TS4RR

Total energy= -2814.54994919

Sum of electronic and zero-point Energies= -2813.707395

Sum of electronic and thermal Energies= -2813.658189

Sum of electronic and thermal Enthalpies= -2813.657245

Sum of electronic and thermal Free Energies= -2813.789834

|   |             |             |             |
|---|-------------|-------------|-------------|
| C | -1.00004600 | 2.04150400  | 2.47995400  |
| C | -0.57597300 | 2.51526200  | 3.71699500  |
| C | -0.95015300 | 3.78737800  | 4.14068200  |
| C | -1.75559500 | 4.56625200  | 3.30997900  |
| C | -2.18815500 | 4.08014400  | 2.07393400  |
| C | -1.81492800 | 2.80457100  | 1.65168800  |
| C | -0.46859700 | 0.64645400  | 2.22537600  |
| C | 0.04933200  | 0.17190000  | 3.62032100  |
| C | 0.27350600  | 1.48481400  | 4.41863000  |
| H | -0.62837300 | 4.16591500  | 5.10656400  |
| H | -2.05857200 | 5.55771400  | 3.63123200  |
| H | -2.82243800 | 4.69490100  | 1.44329400  |
| H | -2.15650300 | 2.40823300  | 0.69758800  |
| H | 1.00233600  | -0.34437000 | 3.47932200  |
| H | 0.01090100  | 1.37428900  | 5.47575600  |
| H | 0.33275200  | 0.67682100  | 1.48353900  |
| H | 1.32857300  | 1.77820400  | 4.37960400  |
| C | -2.53878900 | -0.67313000 | 2.49368100  |
| C | -1.77422000 | -0.51375900 | 0.40323000  |
| N | -3.45043800 | -1.25561200 | 1.77153300  |
| N | -1.51776500 | -0.21655000 | 1.69900800  |
| N | -2.95688000 | -1.13520200 | 0.48661800  |
| C | -2.40846500 | -0.52503200 | 3.96995800  |
| H | -2.69269400 | 0.49063400  | 4.26999400  |
| H | -3.07706900 | -1.22674800 | 4.47105200  |
| C | -3.79601500 | -1.52730100 | -0.61014200 |
| C | -3.75555400 | -2.84804800 | -1.06603800 |
| C | -4.65705500 | -0.57042900 | -1.14784900 |
| C | -4.60613300 | -3.19391600 | -2.11170600 |
| C | -5.49306200 | -0.96364000 | -2.19547600 |
| C | -5.47761500 | -2.26586500 | -2.69003900 |
| H | -4.59122200 | -4.21564300 | -2.48464400 |
| H | -6.17468600 | -0.23483600 | -2.62698600 |
| C | -2.80941300 | -3.83566500 | -0.44637000 |
| H | -1.78014900 | -3.50515300 | -0.60545600 |
| H | -2.96304100 | -3.89618600 | 0.63591300  |
| H | -2.95171700 | -4.82892700 | -0.87659100 |
| C | -6.37799600 | -2.67924900 | -3.82596200 |
| H | -5.78993600 | -2.99347800 | -4.69378400 |
| H | -7.00803100 | -3.52599600 | -3.53831400 |
| H | -7.02792700 | -1.85842400 | -4.13539300 |
| C | -4.68356900 | 0.83987400  | -0.61781200 |
| H | -4.63794700 | 0.85672900  | 0.47494900  |
| H | -3.83036000 | 1.41708200  | -0.99087200 |
| H | -5.59264800 | 1.35318600  | -0.93605800 |
| C | 0.40448200  | 1.53521800  | -2.06761700 |
| C | 1.65933100  | 0.71237000  | -2.28203400 |
| C | -0.50602500 | -0.62231100 | -1.31799200 |
| C | -0.65087200 | 0.83684400  | -1.64720000 |
| H | 1.51269500  | 0.04523000  | -3.13547600 |
| H | -1.63855900 | 1.27589300  | -1.57483600 |
| O | -0.95958400 | -1.52172100 | -2.01113900 |
| C | 0.32105000  | 2.99015500  | -2.34766500 |
| C | 0.00653000  | 3.85680100  | -1.29797100 |
| C | 0.51447800  | 3.51028200  | -3.63215700 |

|    |             |             |             |
|----|-------------|-------------|-------------|
| C  | -0.12987300 | 5.22356700  | -1.52891100 |
| H  | -0.10909500 | 3.44954200  | -0.29825000 |
| C  | 0.37781800  | 4.87528500  | -3.86084300 |
| H  | 0.75964500  | 2.84243400  | -4.45292200 |
| C  | 0.05381200  | 5.73454700  | -2.81079100 |
| H  | -0.37525100 | 5.88541700  | -0.70402700 |
| H  | 0.52029800  | 5.27057700  | -4.86148000 |
| H  | -0.05171600 | 6.79915300  | -2.99371800 |
| Cl | 3.09725600  | 1.69973700  | -2.71877800 |
| C  | -0.93154700 | -0.80250800 | 4.30743000  |
| H  | -0.70889700 | -1.82456400 | 3.98370600  |
| H  | -0.78021400 | -0.76827900 | 5.38958700  |
| C  | 4.26162900  | -0.78552700 | -0.75166500 |
| C  | 3.09896300  | -1.14828400 | -1.43460900 |
| C  | 3.09549400  | -2.20597200 | -2.32042100 |
| C  | 4.29080400  | -2.90989500 | -2.52099400 |
| C  | 5.44696100  | -2.53869300 | -1.83930400 |
| C  | 5.45412000  | -1.46611900 | -0.93816400 |
| C  | 2.69067200  | 0.68092100  | 0.03677700  |
| C  | 1.99711800  | -0.18549700 | -1.05319800 |
| H  | 2.18057300  | -2.49193500 | -2.83368400 |
| H  | 4.31455200  | -3.74934800 | -3.20684500 |
| H  | 6.36625800  | -3.09078100 | -2.00535400 |
| H  | 6.35706400  | -1.18437700 | -0.40652900 |
| N  | 4.00085800  | 0.29450900  | 0.10204200  |
| O  | 2.16823300  | 1.56940100  | 0.68150700  |
| N  | 0.77089700  | -0.83089300 | -0.57256300 |
| C  | 4.98178900  | 0.92662900  | 0.95535600  |
| H  | 4.47818500  | 1.72887900  | 1.49385800  |
| H  | 5.39134700  | 0.20766500  | 1.67112500  |
| H  | 5.79564100  | 1.34279200  | 0.35529800  |
| C  | 0.85984400  | -1.84752900 | 0.35650400  |
| O  | 0.01021600  | -2.69280300 | 0.54416300  |
| O  | 1.98825700  | -1.71922900 | 1.08139100  |
| C  | 2.53173300  | -2.85627400 | 1.82833800  |
| C  | 1.60464000  | -3.27288400 | 2.96572400  |
| C  | 2.80486800  | -4.00263100 | 0.86153400  |
| C  | 3.83385800  | -2.30335400 | 2.39501600  |
| H  | 1.45826700  | -2.44342600 | 3.66304600  |
| H  | 0.63854500  | -3.60717400 | 2.59091100  |
| H  | 2.07720800  | -4.09114400 | 3.51664300  |
| H  | 3.47030400  | -3.66760000 | 0.05988600  |
| H  | 3.29211400  | -4.81972100 | 1.40056300  |
| H  | 1.87616500  | -4.37891900 | 0.42750100  |
| H  | 4.29974300  | -3.05148600 | 3.04150400  |
| H  | 4.52950800  | -2.05744400 | 1.58860500  |
| H  | 3.63823600  | -1.40336500 | 2.98648600  |

#### TS4RS

|                                              |                |              |
|----------------------------------------------|----------------|--------------|
| Total energy=                                | -2814.55102143 |              |
| Sum of electronic and zero-point Energies=   |                | -2813.709250 |
| Sum of electronic and thermal Energies=      |                | -2813.660842 |
| Sum of electronic and thermal Enthalpies=    |                | -2813.659898 |
| Sum of electronic and thermal Free Energies= |                | -2813.790239 |

|   |            |             |            |
|---|------------|-------------|------------|
| C | 0.26030700 | -1.13725800 | 3.00168200 |
|---|------------|-------------|------------|

|   |             |             |             |
|---|-------------|-------------|-------------|
| C | 0.94740400  | -1.85697900 | 3.97287000  |
| C | 1.03196700  | -1.36356400 | 5.27343400  |
| C | 0.41614000  | -0.15041400 | 5.57796600  |
| C | -0.28470100 | 0.56088200  | 4.60057700  |
| C | -0.37270900 | 0.06581100  | 3.30165300  |
| C | 0.31212800  | -1.84330600 | 1.66174200  |
| C | 0.87486400  | -3.26893800 | 1.98995000  |
| C | 1.50791300  | -3.13655500 | 3.40267800  |
| H | 1.56333400  | -1.91751300 | 6.04474000  |
| H | 0.47429200  | 0.24489800  | 6.58768600  |
| H | -0.76802800 | 1.49927400  | 4.85553300  |
| H | -0.91796400 | 0.60927500  | 2.53001100  |
| H | 1.64807800  | -3.51277000 | 1.26086100  |
| H | 1.27917200  | -4.00091900 | 4.03460100  |
| H | 0.96300800  | -1.31021500 | 0.96267500  |
| H | 2.60156300  | -3.07522900 | 3.33076600  |
| C | -1.97647900 | -2.75741400 | 1.49999900  |
| C | -1.56458800 | -1.01177500 | 0.17244700  |
| N | -3.12014700 | -2.49963300 | 0.93848300  |
| N | -1.01809400 | -1.88070900 | 1.05890000  |
| N | -2.83896800 | -1.41630700 | 0.13361500  |
| C | -1.57861400 | -3.86991300 | 2.40837100  |
| H | -1.50975100 | -3.50648100 | 3.44037000  |
| H | -2.33518700 | -4.65545400 | 2.37366100  |
| C | -3.92897600 | -0.79091300 | -0.56128600 |
| C | -4.24556900 | -1.22466100 | -1.85019000 |
| C | -4.65056800 | 0.19955000  | 0.10752800  |
| C | -5.32193700 | -0.60983200 | -2.48681100 |
| C | -5.71224300 | 0.79603300  | -0.57493400 |
| C | -6.05620800 | 0.40767000  | -1.87016800 |
| H | -5.59013700 | -0.92710000 | -3.49038200 |
| H | -6.28696600 | 1.57405700  | -0.07902100 |
| C | -3.43960400 | -2.31374500 | -2.50106700 |
| H | -2.39483600 | -1.99990500 | -2.57983100 |
| H | -3.46936800 | -3.22910900 | -1.89738100 |
| H | -3.83365600 | -2.54225900 | -3.49235600 |
| C | -7.18627600 | 1.08408200  | -2.60103900 |
| H | -7.67185000 | 0.39853900  | -3.30073300 |
| H | -7.93913400 | 1.46040400  | -1.90346500 |
| H | -6.81400200 | 1.93711600  | -3.17928300 |
| C | -4.34001100 | 0.57140600  | 1.53333800  |
| H | -4.76126800 | -0.17130500 | 2.22081800  |
| H | -3.26325000 | 0.60517500  | 1.72572800  |
| H | -4.76776900 | 1.54339100  | 1.78123600  |
| C | -0.12386500 | 2.55703500  | -0.47862200 |
| C | 0.97411300  | 2.29052700  | -1.49396900 |
| C | -0.89337400 | 0.34377100  | -1.23264500 |
| C | -1.02175700 | 1.57689700  | -0.37844000 |
| H | 0.53698500  | 2.27682200  | -2.49694600 |
| H | -1.91246000 | 1.67031300  | 0.23326600  |
| O | -1.61020200 | 0.19212400  | -2.22102200 |
| C | -0.27503000 | 3.82602600  | 0.28239900  |
| C | 0.72127000  | 4.28893300  | 1.14835100  |
| C | -1.47635000 | 4.53758500  | 0.18268300  |
| C | 0.51740800  | 5.44246200  | 1.89755300  |
| H | 1.65159700  | 3.73503500  | 1.24345200  |
| C | -1.67670100 | 5.69335500  | 0.93126000  |

|    |             |             |             |
|----|-------------|-------------|-------------|
| H  | -2.24717100 | 4.18089500  | -0.49496200 |
| C  | -0.67817000 | 6.14909500  | 1.79041300  |
| H  | 1.29465200  | 5.79004800  | 2.57164900  |
| H  | -2.61176500 | 6.23868800  | 0.84133500  |
| H  | -0.83257800 | 7.05267700  | 2.37194400  |
| Cl | 2.24073500  | 3.56020600  | -1.56497200 |
| C  | -0.20862600 | -4.36179700 | 1.91324400  |
| H  | -0.32125500 | -4.69044800 | 0.87416000  |
| H  | 0.11361900  | -5.23080100 | 2.49021200  |
| C  | 3.84418700  | 0.74830900  | -0.50028000 |
| C  | 2.51896200  | 0.84596000  | -0.06597700 |
| C  | 2.23059700  | 0.92485600  | 1.28198200  |
| C  | 3.28086500  | 0.86596800  | 2.20742000  |
| C  | 4.59543500  | 0.75552400  | 1.75954100  |
| C  | 4.90232200  | 0.70329900  | 0.39557500  |
| C  | 2.63545300  | 0.71070900  | -2.44246700 |
| C  | 1.61605000  | 0.89486200  | -1.27451300 |
| H  | 1.20516400  | 1.03101100  | 1.61892900  |
| H  | 3.06263400  | 0.90365300  | 3.26861600  |
| H  | 5.40577500  | 0.71179400  | 2.48097500  |
| H  | 5.92912600  | 0.63033300  | 0.05315400  |
| N  | 3.89013400  | 0.70882200  | -1.89826500 |
| O  | 2.35415800  | 0.66554300  | -3.62084400 |
| N  | 0.53269300  | -0.09625200 | -1.30706200 |
| C  | 5.10969400  | 0.74197300  | -2.67658200 |
| H  | 4.82846800  | 0.69514000  | -3.72846500 |
| H  | 5.65519700  | 1.66942300  | -2.48417300 |
| H  | 5.74630200  | -0.10933800 | -2.42766500 |
| C  | 0.77259200  | -1.40801500 | -1.64883700 |
| O  | -0.09102300 | -2.24556700 | -1.81098800 |
| O  | 2.09405100  | -1.64815200 | -1.70143800 |
| C  | 2.59748200  | -2.84700200 | -2.37588200 |
| C  | 2.35589000  | -4.06384700 | -1.49334100 |
| C  | 1.96314400  | -2.98915600 | -3.75716500 |
| C  | 4.08557900  | -2.55830000 | -2.51254100 |
| H  | 2.89329000  | -3.95438900 | -0.54519700 |
| H  | 1.29069100  | -4.19088600 | -1.29898400 |
| H  | 2.73388400  | -4.95867400 | -1.99704200 |
| H  | 2.02762800  | -2.03554300 | -4.28849600 |
| H  | 2.52034600  | -3.74237000 | -4.32317900 |
| H  | 0.92082900  | -3.29635700 | -3.69350100 |
| H  | 4.60464900  | -3.44792400 | -2.87400400 |
| H  | 4.24757400  | -1.74473200 | -3.22563500 |
| H  | 4.50637900  | -2.26996700 | -1.54392200 |

#### TS4SR

Total energy= -2814.55797808

Sum of electronic and zero-point Energies= -2813.714529

Sum of electronic and thermal Energies= -2813.665617

Sum of electronic and thermal Enthalpies= -2813.664673

Sum of electronic and thermal Free Energies= -2813.795837

|   |            |            |             |
|---|------------|------------|-------------|
| C | 4.56700000 | 0.51726800 | -1.19351200 |
| C | 5.93753700 | 0.29053100 | -1.25275800 |
| C | 6.78285600 | 1.25396700 | -1.80130200 |
| C | 6.23297400 | 2.43930500 | -2.28306300 |

|   |             |             |             |
|---|-------------|-------------|-------------|
| C | 4.85379000  | 2.66061600  | -2.22337500 |
| C | 4.00891600  | 1.69749800  | -1.67803200 |
| C | 3.83717100  | -0.64121500 | -0.54981800 |
| C | 4.96862500  | -1.64363700 | -0.12590500 |
| C | 6.29974800  | -1.05074400 | -0.67102800 |
| H | 7.85501900  | 1.08534500  | -1.84869900 |
| H | 6.88120800  | 3.19866800  | -2.70933500 |
| H | 4.44086600  | 3.58750300  | -2.60862000 |
| H | 2.93265800  | 1.84187200  | -1.64523300 |
| H | 4.76559900  | -2.59854800 | -0.61485300 |
| H | 7.05184500  | -0.95170400 | 0.12126500  |
| H | 3.12152600  | -1.09982100 | -1.22931500 |
| H | 6.73590200  | -1.70511300 | -1.43231700 |
| C | 3.56547400  | -0.03318900 | 1.85368000  |
| C | 1.74874600  | 0.24763400  | 0.58536200  |
| N | 2.67979800  | 0.45961700  | 2.66848200  |
| N | 3.04179700  | -0.17205000 | 0.59444700  |
| N | 1.57795300  | 0.63277700  | 1.85781800  |
| C | 4.92120800  | -0.56421700 | 2.15732000  |
| H | 5.69230400  | 0.14112800  | 1.82359000  |
| H | 5.02510100  | -0.69436800 | 3.23557800  |
| C | 0.40388500  | 1.18679900  | 2.45990200  |
| C | -0.43365900 | 0.32721900  | 3.17821300  |
| C | 0.18224700  | 2.56562500  | 2.38978300  |
| C | -1.50811100 | 0.88901800  | 3.86446400  |
| C | -0.93773300 | 3.07418800  | 3.05162700  |
| C | -1.78410500 | 2.25573800  | 3.80083800  |
| H | -2.16497000 | 0.23711500  | 4.43530600  |
| H | -1.13773700 | 4.14299800  | 2.99639100  |
| C | -0.23151900 | -1.16254100 | 3.13391300  |
| H | -0.63768100 | -1.55720000 | 2.19275000  |
| H | 0.82541900  | -1.43605800 | 3.18453800  |
| H | -0.76266100 | -1.65067900 | 3.95374400  |
| C | -2.98773200 | 2.83755100  | 4.49656200  |
| H | -2.71990100 | 3.72634200  | 5.07388900  |
| H | -3.74502100 | 3.13990500  | 3.76524000  |
| H | -3.44334200 | 2.11079700  | 5.17245700  |
| C | 1.11531100  | 3.50083100  | 1.66409700  |
| H | 1.65969100  | 4.12283300  | 2.38086100  |
| H | 1.85071000  | 2.96704200  | 1.05926800  |
| H | 0.54953400  | 4.17264300  | 1.01048000  |
| C | -1.32522000 | 1.59865500  | -1.62320700 |
| C | -1.91871800 | 0.32430000  | -2.20154800 |
| C | 0.57062900  | 0.11039400  | -1.24686400 |
| C | -0.09382400 | 1.45011300  | -1.12671100 |
| H | -1.37960800 | 0.02765600  | -3.10633800 |
| H | 0.48727800  | 2.28936300  | -0.76090900 |
| O | 1.40927400  | -0.10642000 | -2.11461400 |
| C | -2.00366900 | 2.91677200  | -1.63332200 |
| C | -2.50748500 | 3.47589100  | -2.81380900 |
| C | -2.08324500 | 3.65163700  | -0.44582300 |
| C | -3.07440100 | 4.74552100  | -2.80216300 |
| H | -2.44076300 | 2.92172100  | -3.74486700 |
| C | -2.65351000 | 4.92175200  | -0.43562200 |
| H | -1.70580300 | 3.21428700  | 0.47492200  |
| C | -3.15131100 | 5.47139000  | -1.61392000 |
| H | -3.45435900 | 5.17150500  | -3.72509900 |



|    |             |             |             |
|----|-------------|-------------|-------------|
| H  | -2.71223700 | 5.47672000  | 0.49576400  |
| H  | -3.59792900 | 6.46045700  | -1.60837900 |
| Cl | -3.63533500 | 0.48017200  | -2.70222400 |
| C  | 5.03465700  | -1.88826300 | 1.38732800  |
| H  | 4.21563500  | -2.54544000 | 1.69955700  |
| H  | 5.97218800  | -2.39543000 | 1.63086400  |
| C  | -3.73382300 | -1.73195700 | -0.21942200 |
| C  | -2.75587700 | -0.74541600 | -0.04310600 |
| C  | -2.86242900 | 0.16315200  | 0.99040000  |
| C  | -3.95833000 | 0.06542300  | 1.85895100  |
| C  | -4.91758600 | -0.92533000 | 1.67780900  |
| C  | -4.82200500 | -1.84741000 | 0.62919700  |
| C  | -2.27696800 | -2.11760600 | -1.93792300 |
| C  | -1.77096800 | -0.84888600 | -1.18507100 |
| H  | -2.10895800 | 0.93374200  | 1.12941400  |
| H  | -4.05911800 | 0.77216600  | 2.67567000  |
| H  | -5.76206500 | -0.98480200 | 2.35679100  |
| H  | -5.57736600 | -2.61180600 | 0.48209300  |
| N  | -3.44167500 | -2.51270300 | -1.34468000 |
| O  | -1.75134800 | -2.60738800 | -2.91597400 |
| N  | -0.35083000 | -0.96164100 | -0.83061600 |
| C  | -4.29514000 | -3.55793800 | -1.86144500 |
| H  | -3.77524900 | -4.02518800 | -2.69791600 |
| H  | -4.49204400 | -4.30730100 | -1.08962300 |
| H  | -5.24486300 | -3.13962500 | -2.20781200 |
| C  | 0.17393700  | -2.15433100 | -0.38205300 |
| O  | 1.35946700  | -2.39013200 | -0.26985800 |
| O  | -0.81389100 | -2.99181800 | -0.02853300 |
| C  | -0.52514200 | -4.38765000 | 0.29409600  |
| C  | 0.25838200  | -5.04240800 | -0.83966000 |
| C  | 0.20146100  | -4.46128500 | 1.63170600  |
| C  | -1.91644500 | -5.00062700 | 0.39385100  |
| H  | -0.22469100 | -4.81390200 | -1.79455900 |
| H  | 1.29061800  | -4.69511300 | -0.86903100 |
| H  | 0.24930000  | -6.12640400 | -0.69550000 |
| H  | -0.41571100 | -4.02634100 | 2.42334600  |
| H  | 0.39192000  | -5.50921700 | 1.88016200  |
| H  | 1.15349700  | -3.93100100 | 1.58329700  |
| H  | -1.84585900 | -6.02059600 | 0.78005900  |
| H  | -2.54569800 | -4.40739900 | 1.06457400  |
| H  | -2.38440300 | -5.03242900 | -0.59380700 |

#### TS4SS

|                                              |                |              |
|----------------------------------------------|----------------|--------------|
| Total energy=                                | -2814.55680707 |              |
| Sum of electronic and zero-point Energies=   |                | -2813.714150 |
| Sum of electronic and thermal Energies=      |                | -2813.665124 |
| Sum of electronic and thermal Enthalpies=    |                | -2813.664180 |
| Sum of electronic and thermal Free Energies= |                | -2813.795402 |

|   |            |             |             |
|---|------------|-------------|-------------|
| C | 4.54701700 | -0.32214900 | -1.24375100 |
| C | 5.87034500 | -0.74846100 | -1.23846100 |
| C | 6.80567000 | -0.13655200 | -2.07106800 |
| C | 6.39220100 | 0.90305000  | -2.90071300 |
| C | 5.05932000 | 1.32508600  | -2.90409300 |
| C | 4.12389800 | 0.71205700  | -2.07457800 |
| C | 3.70641500 | -1.10669300 | -0.25983800 |

|    |             |             |             |
|----|-------------|-------------|-------------|
| C  | 4.73123000  | -2.02236800 | 0.50088800  |
| C  | 6.07704700  | -1.88109900 | -0.26681000 |
| H  | 7.84240900  | -0.46125300 | -2.07030700 |
| H  | 7.11141600  | 1.39058300  | -3.55156900 |
| H  | 4.75304200  | 2.13362700  | -3.56021500 |
| H  | 3.07825600  | 1.00845400  | -2.08249700 |
| H  | 4.37619500  | -3.05337300 | 0.44463700  |
| H  | 6.91125400  | -1.68065000 | 0.41577400  |
| H  | 2.92566300  | -1.68290700 | -0.75605700 |
| H  | 6.32324000  | -2.80665300 | -0.79719500 |
| C  | 3.61523900  | 0.38321900  | 1.73230100  |
| C  | 1.75232700  | 0.31305900  | 0.50431300  |
| N  | 2.82308900  | 1.24253300  | 2.30411500  |
| N  | 3.00322900  | -0.19320000 | 0.64805200  |
| N  | 1.69081700  | 1.18644100  | 1.52002400  |
| C  | 4.94142300  | -0.12658500 | 2.17449800  |
| H  | 5.74177000  | 0.30641800  | 1.56139800  |
| H  | 5.11534400  | 0.15940700  | 3.21288400  |
| C  | 0.58894800  | 2.04883200  | 1.83147400  |
| C  | -0.42120100 | 1.56534100  | 2.66840700  |
| C  | 0.56521200  | 3.33751600  | 1.29136000  |
| C  | -1.48057900 | 2.41944800  | 2.96107600  |
| C  | -0.53411800 | 4.14453200  | 1.58787700  |
| C  | -1.55890600 | 3.70460100  | 2.42249800  |
| H  | -2.28061000 | 2.05951800  | 3.60396400  |
| H  | -0.59588800 | 5.13490400  | 1.14099500  |
| C  | -0.38517000 | 0.16279300  | 3.21242700  |
| H  | -0.81936100 | -0.53773000 | 2.49045200  |
| H  | 0.63532900  | -0.16019800 | 3.43546300  |
| H  | -0.97876600 | 0.09786100  | 4.12759600  |
| C  | -2.73651400 | 4.58900600  | 2.74059800  |
| H  | -2.76244100 | 4.83805600  | 3.80612500  |
| H  | -2.69590900 | 5.51972200  | 2.17038300  |
| H  | -3.67672500 | 4.08345600  | 2.49900900  |
| C  | 1.67699900  | 3.87139100  | 0.42435700  |
| H  | 2.30120000  | 4.57125000  | 0.98865000  |
| H  | 2.33078200  | 3.07969400  | 0.05002000  |
| H  | 1.25759200  | 4.41342000  | -0.42903100 |
| C  | -1.31922000 | 1.50258000  | -1.51220800 |
| C  | -2.11440000 | 0.26200500  | -1.88501200 |
| C  | 0.46691300  | -0.15740200 | -1.21782300 |
| C  | -0.02634200 | 1.25649900  | -1.29402200 |
| H  | -1.72941500 | -0.09803300 | -2.84238400 |
| H  | 0.68891200  | 2.05445000  | -1.13955700 |
| O  | 1.21798300  | -0.66768600 | -2.03897000 |
| C  | -1.85071200 | 2.88596400  | -1.47388300 |
| C  | -2.96081700 | 3.21133600  | -0.68521900 |
| C  | -1.17042000 | 3.90780400  | -2.14540400 |
| C  | -3.38674400 | 4.53189700  | -0.58750800 |
| H  | -3.46267600 | 2.42860500  | -0.12506600 |
| C  | -1.58869200 | 5.23109900  | -2.03179300 |
| H  | -0.31376500 | 3.65710600  | -2.76473600 |
| C  | -2.70204600 | 5.54565000  | -1.25602200 |
| H  | -4.25028200 | 4.77356600  | 0.02426300  |
| H  | -1.05194400 | 6.01335300  | -2.55918100 |
| H  | -3.03683900 | 6.57497300  | -1.17451800 |
| Cl | -3.85710300 | 0.54802800  | -2.20750400 |

|   |             |             |             |
|---|-------------|-------------|-------------|
| C | 4.88490200  | -1.65148900 | 1.98445700  |
| H | 4.03708300  | -2.04022500 | 2.55878500  |
| H | 5.78910800  | -2.12076900 | 2.38123800  |
| C | -3.63519200 | -2.53938200 | -0.72229900 |
| C | -2.48839500 | -2.18910400 | -1.43821400 |
| C | -2.02360600 | -2.98327800 | -2.46606400 |
| C | -2.74169000 | -4.14361700 | -2.78835900 |
| C | -3.89269600 | -4.47675600 | -2.07891800 |
| C | -4.36135400 | -3.67941200 | -1.02702900 |
| C | -2.88991900 | -0.65001500 | 0.33599000  |
| C | -1.93759900 | -0.90055300 | -0.86709200 |
| H | -1.11232400 | -2.71838100 | -2.99670000 |
| H | -2.39804800 | -4.78525100 | -3.59203800 |
| H | -4.44037300 | -5.37633300 | -2.34026100 |
| H | -5.25285300 | -3.95014200 | -0.47088900 |
| N | -3.86401200 | -1.61285000 | 0.30133600  |
| O | -2.82139200 | 0.27457400  | 1.11890000  |
| N | -0.52128800 | -0.98570300 | -0.49406400 |
| C | -4.97920200 | -1.65549200 | 1.21897000  |
| H | -4.86268400 | -0.82408300 | 1.91379600  |
| H | -5.92407000 | -1.55215800 | 0.67810300  |
| H | -4.98392100 | -2.59695100 | 1.77637100  |
| C | -0.08545100 | -2.05547400 | 0.25696500  |
| O | 1.05898300  | -2.45589500 | 0.30882700  |
| O | -1.10864900 | -2.55203600 | 0.97096500  |
| C | -0.98507900 | -3.82351300 | 1.67761500  |
| C | -0.67123100 | -4.92517700 | 0.67158900  |
| C | 0.05484000  | -3.71496900 | 2.78831400  |
| C | -2.37601200 | -4.01578600 | 2.27028100  |
| H | -1.41589300 | -4.91225200 | -0.13217600 |
| H | 0.32325400  | -4.79410400 | 0.24240400  |
| H | -0.71536300 | -5.89651300 | 1.17204000  |
| H | -0.19265300 | -2.87975000 | 3.45047200  |
| H | 0.04320600  | -4.63541800 | 3.37885900  |
| H | 1.05316000  | -3.56423200 | 2.37989900  |
| H | -2.38974200 | -4.90969100 | 2.89890300  |
| H | -2.64759700 | -3.14953700 | 2.88172700  |
| H | -3.11540500 | -4.13714600 | 1.47329900  |

#### M4RR

|                                              |                |  |              |
|----------------------------------------------|----------------|--|--------------|
| Total energy=                                | -2814.56994035 |  |              |
| Sum of electronic and zero-point Energies=   |                |  | -2813.728372 |
| Sum of electronic and thermal Energies=      |                |  | -2813.677971 |
| Sum of electronic and thermal Enthalpies=    |                |  | -2813.677027 |
| Sum of electronic and thermal Free Energies= |                |  | -2813.813637 |

|   |             |            |            |
|---|-------------|------------|------------|
| C | 0.34035700  | 2.53130100 | 2.27621800 |
| C | 0.09063300  | 3.67639500 | 3.02233900 |
| C | 0.36561700  | 3.69578300 | 4.38953800 |
| C | 0.89752000  | 2.55527900 | 4.98574000 |
| C | 1.15367900  | 1.40792000 | 4.22736100 |
| C | 0.87829500  | 1.38860900 | 2.86342800 |
| C | -0.00315300 | 2.73118600 | 0.81385700 |
| C | -0.35735900 | 4.25789000 | 0.69898000 |
| C | -0.46573000 | 4.77968900 | 2.16009300 |
| H | 0.17595800  | 4.58877300 | 4.97857000 |

|    |             |             |             |
|----|-------------|-------------|-------------|
| H  | 1.12116000  | 2.55781500  | 6.04815000  |
| H  | 1.57110400  | 0.52669000  | 4.70514700  |
| H  | 1.05480000  | 0.50203700  | 2.26114400  |
| H  | -1.32547000 | 4.36199500  | 0.20155700  |
| H  | 0.08620000  | 5.71712900  | 2.29503300  |
| H  | -0.83057000 | 2.08155500  | 0.51105700  |
| H  | -1.50788200 | 4.99090700  | 2.42217200  |
| C  | 2.21752500  | 3.17735200  | -0.18335900 |
| C  | 1.39418700  | 1.09556200  | -0.51120300 |
| N  | 3.18677400  | 2.54526200  | -0.77345800 |
| N  | 1.13264900  | 2.35088200  | -0.02328700 |
| N  | 2.65531000  | 1.28021000  | -0.95137700 |
| C  | 2.11315300  | 4.61066300  | 0.20946500  |
| H  | 2.30970700  | 4.72533400  | 1.28310400  |
| H  | 2.85816800  | 5.19580100  | -0.33231500 |
| C  | 3.49867600  | 0.25924500  | -1.49307700 |
| C  | 3.58848900  | 0.11627500  | -2.87954400 |
| C  | 4.20089000  | -0.55748100 | -0.60625300 |
| C  | 4.42067400  | -0.88330800 | -3.37578100 |
| C  | 5.01388400  | -1.55683900 | -1.14654600 |
| C  | 5.13639400  | -1.72978600 | -2.52457000 |
| H  | 4.50280000  | -1.01584200 | -4.45245600 |
| H  | 5.56936400  | -2.20662800 | -0.47408900 |
| C  | 2.75685800  | 0.98854800  | -3.77762400 |
| H  | 1.69563800  | 0.78706400  | -3.59382600 |
| H  | 2.94037100  | 2.04837700  | -3.57648500 |
| H  | 2.97817000  | 0.78754300  | -4.82771700 |
| C  | 6.01532700  | -2.81279400 | -3.09733100 |
| H  | 5.41604700  | -3.55488500 | -3.63942700 |
| H  | 6.73787300  | -2.39649100 | -3.80977200 |
| H  | 6.56943700  | -3.33173800 | -2.30936400 |
| C  | 4.06316300  | -0.36964900 | 0.88221900  |
| H  | 4.25438500  | 0.67035000  | 1.16548600  |
| H  | 3.04590000  | -0.60652600 | 1.21405200  |
| H  | 4.76156600  | -1.01247900 | 1.42132400  |
| C  | 0.14008400  | -2.74649500 | 0.60377100  |
| C  | -1.31663900 | -2.86061400 | 0.18543600  |
| C  | 0.42557900  | -1.61748100 | -1.56399200 |
| C  | 0.94602300  | -2.21053300 | -0.31394600 |
| H  | -1.40346100 | -3.64114000 | -0.57544600 |
| H  | 2.02459300  | -2.16146400 | -0.20021600 |
| O  | 1.08537300  | -1.53636200 | -2.57170100 |
| C  | 0.67470800  | -3.25193500 | 1.89223800  |
| C  | 0.30592600  | -2.63536900 | 3.09466800  |
| C  | 1.61584300  | -4.28368900 | 1.90606900  |
| C  | 0.87240100  | -3.05705800 | 4.29283000  |
| H  | -0.40224500 | -1.81157300 | 3.07355100  |
| C  | 2.17460100  | -4.70703500 | 3.11001600  |
| H  | 1.90372200  | -4.75468600 | 0.97086900  |
| C  | 1.80291700  | -4.09593900 | 4.30398800  |
| H  | 0.58993800  | -2.56958100 | 5.22066200  |
| H  | 2.90060900  | -5.51371000 | 3.11241200  |
| H  | 2.23917500  | -4.42501300 | 5.24170300  |
| Cl | -2.40954000 | -3.39838200 | 1.50314200  |
| C  | 0.67826600  | 5.04849400  | -0.11939500 |
| H  | 0.50826600  | 4.89230600  | -1.19057800 |
| H  | 0.54800700  | 6.11668600  | 0.07414600  |

|   |             |             |             |
|---|-------------|-------------|-------------|
| C | -4.11752100 | -0.95613400 | -0.18152700 |
| C | -3.23764800 | -1.68699200 | -0.98454500 |
| C | -3.69477000 | -2.36845900 | -2.09374000 |
| C | -5.06517100 | -2.32599200 | -2.38519600 |
| C | -5.93585900 | -1.60795700 | -1.57015600 |
| C | -5.47579500 | -0.90458500 | -0.44980100 |
| C | -2.06614300 | -0.53609200 | 0.74152300  |
| C | -1.83806100 | -1.53598300 | -0.42961500 |
| H | -3.00626100 | -2.91667100 | -2.73095200 |
| H | -5.44799400 | -2.85390000 | -3.25145500 |
| H | -6.99457100 | -1.58576300 | -1.80688500 |
| H | -6.15553200 | -0.33784700 | 0.17782300  |
| N | -3.41235000 | -0.30936600 | 0.83845400  |
| O | -1.21796600 | -0.11249600 | 1.49847000  |
| N | -0.89572300 | -1.10633700 | -1.47089400 |
| C | -4.01167500 | 0.47796300  | 1.89254300  |
| H | -3.20353300 | 0.83748200  | 2.52978700  |
| H | -4.55557700 | 1.33181200  | 1.47781800  |
| H | -4.69846900 | -0.13616400 | 2.48152700  |
| C | -1.19579600 | 0.03992300  | -2.22885800 |
| O | -0.74576600 | 0.28349700  | -3.31955900 |
| O | -2.04843400 | 0.80814300  | -1.54472600 |
| C | -2.72969600 | 1.92348600  | -2.20071600 |
| C | -1.71164500 | 2.97095900  | -2.63953200 |
| C | -3.57096800 | 1.38579000  | -3.35253600 |
| C | -3.62540500 | 2.46711300  | -1.09470700 |
| H | -1.02349800 | 3.18369500  | -1.81505700 |
| H | -1.13148200 | 2.63118700  | -3.49639400 |
| H | -2.23526300 | 3.89467200  | -2.90190600 |
| H | -4.23453900 | 0.59387900  | -2.98724400 |
| H | -4.18384600 | 2.19468700  | -3.75984100 |
| H | -2.94053300 | 0.98893300  | -4.14952900 |
| H | -4.14596900 | 3.36144100  | -1.44555200 |
| H | -4.36976400 | 1.71755600  | -0.81064400 |
| H | -3.03238300 | 2.72870600  | -0.21193800 |

#### M4RS

|                                              |                |  |              |
|----------------------------------------------|----------------|--|--------------|
| Total energy=                                | -2814.57629600 |  |              |
| Sum of electronic and zero-point Energies=   |                |  | -2813.733552 |
| Sum of electronic and thermal Energies=      |                |  | -2813.683319 |
| Sum of electronic and thermal Enthalpies=    |                |  | -2813.682375 |
| Sum of electronic and thermal Free Energies= |                |  | -2813.819396 |

|   |             |            |             |
|---|-------------|------------|-------------|
| C | -0.96715700 | 3.39262000 | 1.70721800  |
| C | -1.64631500 | 4.57490200 | 1.97768000  |
| C | -1.46811800 | 5.21715500 | 3.20238800  |
| C | -0.59957500 | 4.66082100 | 4.13823500  |
| C | 0.09460200  | 3.48086700 | 3.85387500  |
| C | -0.08056200 | 2.84055500 | 2.62980200  |
| C | -1.28433300 | 2.86816800 | 0.32209000  |
| C | -2.25807600 | 3.93167200 | -0.29283700 |
| C | -2.49125500 | 5.00565200 | 0.80730100  |
| H | -1.99179100 | 6.14334700 | 3.42119300  |
| H | -0.45145400 | 5.15250000 | 5.09452300  |
| H | 0.77876500  | 3.06748000 | 4.58786800  |
| H | 0.47227100  | 1.93587500 | 2.38507600  |

|    |             |             |             |
|----|-------------|-------------|-------------|
| H  | -3.20596900 | 3.43259700  | -0.50729200 |
| H  | -2.20006300 | 6.00504100  | 0.46172900  |
| H  | -1.74830200 | 1.87877500  | 0.36708500  |
| H  | -3.54991900 | 5.06751400  | 1.07739100  |
| C  | 0.51894700  | 3.71382700  | -1.17496600 |
| C  | 0.79051400  | 1.62721400  | -0.35166400 |
| N  | 1.70258200  | 3.36615500  | -1.57995400 |
| N  | -0.05365800 | 2.69990000  | -0.44777400 |
| N  | 1.84334100  | 2.09562300  | -1.05460800 |
| C  | -0.25712900 | 4.95108100  | -1.46930300 |
| H  | -0.13368500 | 5.67669200  | -0.65548400 |
| H  | 0.12414900  | 5.41099400  | -2.38260200 |
| C  | 3.06065200  | 1.38378900  | -1.28115600 |
| C  | 3.42541000  | 1.07489100  | -2.59685800 |
| C  | 3.82244600  | 0.97034400  | -0.17911900 |
| C  | 4.58601600  | 0.32532500  | -2.79188500 |
| C  | 4.97530000  | 0.22553700  | -0.42888900 |
| C  | 5.37270200  | -0.10754400 | -1.72452600 |
| H  | 4.87124400  | 0.05937600  | -3.80708300 |
| H  | 5.56854000  | -0.11535700 | 0.41675500  |
| C  | 2.57724800  | 1.50122800  | -3.76536800 |
| H  | 1.51926800  | 1.32583100  | -3.55548800 |
| H  | 2.70773200  | 2.56603800  | -3.97608200 |
| H  | 2.85087300  | 0.93030200  | -4.65471500 |
| C  | 6.62949300  | -0.90544800 | -1.95890800 |
| H  | 7.50885700  | -0.25325300 | -1.96801700 |
| H  | 6.77864300  | -1.64564500 | -1.16811500 |
| H  | 6.59350200  | -1.42728100 | -2.91782800 |
| C  | 3.38814200  | 1.22847200  | 1.23957200  |
| H  | 3.01546200  | 2.24832200  | 1.37141900  |
| H  | 2.57191200  | 0.54980000  | 1.51349300  |
| H  | 4.22057600  | 1.06103200  | 1.92662400  |
| C  | 1.46685500  | -2.42728300 | 0.29490200  |
| C  | 0.23820100  | -3.29621800 | 0.14110700  |
| C  | 0.72348900  | -1.42732300 | -1.83189000 |
| C  | 1.70200200  | -1.62261300 | -0.74576000 |
| H  | 0.42909900  | -4.02912500 | -0.64832900 |
| H  | 2.61137800  | -1.03980800 | -0.83386400 |
| O  | 1.03606300  | -1.02834300 | -2.92970100 |
| C  | 2.41247400  | -2.46814000 | 1.43424100  |
| C  | 1.96590500  | -2.22917100 | 2.74069700  |
| C  | 3.78351400  | -2.60461300 | 1.19380300  |
| C  | 2.87993300  | -2.13309400 | 3.78460300  |
| H  | 0.90551200  | -2.09055300 | 2.92982300  |
| C  | 4.69415100  | -2.51579100 | 2.24302800  |
| H  | 4.13128400  | -2.77948500 | 0.17955900  |
| C  | 4.24457100  | -2.27981200 | 3.53976600  |
| H  | 2.52541100  | -1.93683400 | 4.79123800  |
| H  | 5.75532300  | -2.62993300 | 2.04453700  |
| H  | 4.95453800  | -2.20761900 | 4.35724700  |
| Cl | -0.15903900 | -4.29785600 | 1.57489500  |
| C  | -1.72974900 | 4.53735700  | -1.60113200 |
| H  | -1.81659300 | 3.80628000  | -2.41269400 |
| H  | -2.34476400 | 5.40009600  | -1.87177400 |
| C  | -2.87413400 | -2.34533600 | 1.10757200  |
| C  | -1.66830200 | -1.70661300 | 0.79704900  |
| C  | -1.27799000 | -0.56010700 | 1.46209700  |

|   |             |             |             |
|---|-------------|-------------|-------------|
| C | -2.11976900 | -0.06389800 | 2.47054600  |
| C | -3.31042400 | -0.71536700 | 2.78251600  |
| C | -3.71321300 | -1.87131300 | 2.10263300  |
| C | -2.07451200 | -3.55676300 | -0.65757400 |
| C | -1.00130700 | -2.48046300 | -0.31244200 |
| H | -0.36465500 | -0.04247100 | 1.16443600  |
| H | -1.84206100 | 0.83735300  | 3.00772400  |
| H | -3.94797800 | -0.31810900 | 3.56573700  |
| H | -4.64688100 | -2.36934700 | 2.34262800  |
| N | -3.07725700 | -3.44475100 | 0.26444900  |
| O | -1.96969600 | -4.39208100 | -1.52896800 |
| N | -0.63047200 | -1.67961500 | -1.48905600 |
| C | -4.19320100 | -4.36002500 | 0.34892300  |
| H | -4.06125600 | -5.10866000 | -0.43185600 |
| H | -4.20793100 | -4.84840300 | 1.32717600  |
| H | -5.14028900 | -3.83542000 | 0.19259400  |
| C | -1.61014000 | -0.84229100 | -2.06348000 |
| O | -1.37385300 | 0.17277700  | -2.66873200 |
| O | -2.81917100 | -1.34085600 | -1.80554800 |
| C | -4.02008200 | -0.53413300 | -2.03318100 |
| C | -3.92340900 | 0.74894500  | -1.21555400 |
| C | -4.19866700 | -0.27659400 | -3.52465900 |
| C | -5.13354400 | -1.42630000 | -1.50072700 |
| H | -3.70275900 | 0.50631200  | -0.16837500 |
| H | -3.14424600 | 1.40396200  | -1.61010400 |
| H | -4.88129200 | 1.27527500  | -1.25645600 |
| H | -4.19516800 | -1.22451600 | -4.06955800 |
| H | -5.16378700 | 0.21081200  | -3.68760700 |
| H | -3.40711400 | 0.36357400  | -3.91260000 |
| H | -6.10334500 | -0.96667700 | -1.70598700 |
| H | -5.09742100 | -2.40705400 | -1.98424200 |
| H | -5.03006900 | -1.55424800 | -0.41932800 |

#### M4SR

|                                              |                |  |              |
|----------------------------------------------|----------------|--|--------------|
| Total energy=                                | -2814.57513658 |  |              |
| Sum of electronic and zero-point Energies=   |                |  | -2813.732807 |
| Sum of electronic and thermal Energies=      |                |  | -2813.682160 |
| Sum of electronic and thermal Enthalpies=    |                |  | -2813.681215 |
| Sum of electronic and thermal Free Energies= |                |  | -2813.820342 |

|   |            |             |             |
|---|------------|-------------|-------------|
| C | 4.38904900 | -0.36074100 | -1.38910400 |
| C | 5.66312700 | -0.90356400 | -1.50830600 |
| C | 6.58055600 | -0.34341100 | -2.39601800 |
| C | 6.19939700 | 0.76281000  | -3.15219300 |
| C | 4.91719300 | 1.30625800  | -3.02496300 |
| C | 4.00070700 | 0.74472000  | -2.13980300 |
| C | 3.55010300 | -1.11311100 | -0.38243700 |
| C | 4.52144400 | -2.18421600 | 0.22736800  |
| C | 5.84404500 | -2.08267300 | -0.58727100 |
| H | 7.57928200 | -0.75946200 | -2.49509200 |
| H | 6.90511300 | 1.20891100  | -3.84612800 |
| H | 4.63718000 | 2.16896200  | -3.62115100 |
| H | 2.99934000 | 1.15105600  | -2.02496700 |
| H | 4.07201700 | -3.16818300 | 0.07587800  |
| H | 6.71134100 | -1.94426700 | 0.07024500  |
| H | 2.69082200 | -1.58161400 | -0.85825000 |

|    |             |             |             |
|----|-------------|-------------|-------------|
| H  | 6.02744200  | -3.00136100 | -1.15346300 |
| C  | 3.72630200  | 0.19021500  | 1.72358100  |
| C  | 1.83478100  | 0.51256700  | 0.52587400  |
| N  | 3.09252500  | 1.11238400  | 2.38282700  |
| N  | 3.00472300  | -0.19726900 | 0.62203600  |
| N  | 1.95036900  | 1.29127900  | 1.62443500  |
| C  | 4.98963800  | -0.51704300 | 2.07086700  |
| H  | 5.82325400  | -0.11525400 | 1.48049600  |
| H  | 5.21867700  | -0.35892300 | 3.12604000  |
| C  | 1.01888200  | 2.28500600  | 2.05541800  |
| C  | 0.24413900  | 2.02880600  | 3.18958500  |
| C  | 0.95560100  | 3.50085200  | 1.36612600  |
| C  | -0.62990500 | 3.02765200  | 3.62309700  |
| C  | 0.06718900  | 4.46830100  | 1.83492100  |
| C  | -0.73719800 | 4.24743000  | 2.95502700  |
| H  | -1.23917100 | 2.84663500  | 4.50630000  |
| H  | 0.01544300  | 5.42709900  | 1.32334600  |
| C  | 0.35793300  | 0.70875200  | 3.90435200  |
| H  | 0.19165400  | -0.11958500 | 3.20624700  |
| H  | 1.35820500  | 0.58178800  | 4.32688700  |
| H  | -0.37682800 | 0.63685700  | 4.70897700  |
| C  | -1.71026700 | 5.30259500  | 3.41367000  |
| H  | -1.26669100 | 6.29971800  | 3.35277800  |
| H  | -2.60423300 | 5.30236900  | 2.78150100  |
| H  | -2.02908000 | 5.12813300  | 4.44345300  |
| C  | 1.82196200  | 3.74872300  | 0.16014500  |
| H  | 2.87933600  | 3.59913900  | 0.40065900  |
| H  | 1.57766200  | 3.04533200  | -0.64195900 |
| H  | 1.68480600  | 4.76560600  | -0.21246100 |
| C  | -1.60718500 | 1.01703700  | -2.13061500 |
| C  | -2.56320900 | -0.15489400 | -2.19605700 |
| C  | 0.12193300  | -0.72335300 | -1.93342000 |
| C  | -0.31656500 | 0.68368200  | -2.02606100 |
| H  | -2.50285300 | -0.65138600 | -3.16960800 |
| H  | 0.48280800  | 1.41315100  | -2.07133500 |
| O  | 1.18081200  | -1.10460700 | -2.37497200 |
| C  | -2.02760100 | 2.43351800  | -2.21085900 |
| C  | -2.84508900 | 2.91044900  | -3.24173500 |
| C  | -1.55131500 | 3.32489600  | -1.24373200 |
| C  | -3.16761800 | 4.26137500  | -3.30756700 |
| H  | -3.21577700 | 2.22623700  | -3.99875200 |
| C  | -1.88433200 | 4.67450600  | -1.30758300 |
| H  | -0.93600100 | 2.95023600  | -0.42916900 |
| C  | -2.69043800 | 5.14555800  | -2.34029100 |
| H  | -3.79354900 | 4.62500300  | -4.11585100 |
| H  | -1.51871800 | 5.35416300  | -0.54427600 |
| H  | -2.95080900 | 6.19782500  | -2.39121200 |
| Cl | -4.28569300 | 0.31616800  | -2.01825600 |
| C  | 4.76369900  | -1.99730400 | 1.73211000  |
| H  | 3.89962100  | -2.35731300 | 2.30111100  |
| H  | 5.62602700  | -2.59704900 | 2.03660500  |
| C  | -3.71288700 | -1.58244000 | 0.64516600  |
| C  | -2.59420300 | -0.82313500 | 0.28170200  |
| C  | -2.05597800 | 0.10290600  | 1.15515600  |
| C  | -2.68269000 | 0.28153600  | 2.39702700  |
| C  | -3.80585600 | -0.46537800 | 2.74037300  |
| C  | -4.34038500 | -1.42157200 | 1.86941100  |



|   |             |             |             |
|---|-------------|-------------|-------------|
| C | -3.16266100 | -2.41103800 | -1.41310300 |
| C | -2.20184200 | -1.21961900 | -1.12081200 |
| H | -1.15599200 | 0.65929800  | 0.89480500  |
| H | -2.29017300 | 1.01604900  | 3.09052700  |
| H | -4.27716800 | -0.30979800 | 3.70538900  |
| H | -5.20915900 | -2.01099100 | 2.14316300  |
| N | -4.04045900 | -2.49052000 | -0.36980100 |
| O | -3.16988600 | -3.06777800 | -2.43147600 |
| N | -0.79229600 | -1.60158400 | -1.29319400 |
| C | -5.16769800 | -3.39479200 | -0.33844600 |
| H | -5.13536700 | -3.99003700 | -1.25054100 |
| H | -5.10770700 | -4.05722900 | 0.52993300  |
| H | -6.10506700 | -2.83285700 | -0.29990200 |
| C | -0.26256100 | -2.62775400 | -0.48634700 |
| O | 0.91384600  | -2.80497100 | -0.28859300 |
| O | -1.25502200 | -3.34289900 | 0.03986100  |
| C | -1.01229200 | -4.19684400 | 1.20831700  |
| C | -0.05366900 | -5.32899100 | 0.85611300  |
| C | -0.51545100 | -3.32054700 | 2.35278900  |
| C | -2.39765400 | -4.74981700 | 1.51646400  |
| H | -0.40593200 | -5.85125700 | -0.03778200 |
| H | 0.95541900  | -4.95990400 | 0.68030000  |
| H | -0.03426700 | -6.04225800 | 1.68471100  |
| H | -1.22630200 | -2.50437700 | 2.52611600  |
| H | -0.44540100 | -3.92159100 | 3.26341800  |
| H | 0.46877800  | -2.90140000 | 2.13342300  |
| H | -2.33008900 | -5.46544900 | 2.33955600  |
| H | -3.07386400 | -3.94228500 | 1.81112800  |
| H | -2.80607800 | -5.26005400 | 0.63898600  |

#### M4SS

Total energy= -2814.57117001

Sum of electronic and zero-point Energies= -2813.727492

Sum of electronic and thermal Energies= -2813.677875

Sum of electronic and thermal Enthalpies= -2813.676930

Sum of electronic and thermal Free Energies= -2813.809228

|   |             |             |             |
|---|-------------|-------------|-------------|
| C | -4.49261400 | -0.38291900 | -1.25368100 |
| C | -5.87222900 | -0.21457700 | -1.26806500 |
| C | -6.66833300 | -1.03689700 | -2.06455900 |
| C | -6.05878600 | -2.02165200 | -2.83809100 |
| C | -4.66988200 | -2.18245000 | -2.82207200 |
| C | -3.87404100 | -1.36123400 | -2.02724100 |
| C | -3.81653200 | 0.59057900  | -0.31050000 |
| C | -4.99918300 | 1.37361000  | 0.36483500  |
| C | -6.29772900 | 0.90419400  | -0.35335700 |
| H | -7.74785000 | -0.91542100 | -2.07877200 |
| H | -6.66768800 | -2.67033300 | -3.46029100 |
| H | -4.21089400 | -2.95157200 | -3.43539500 |
| H | -2.79130600 | -1.45402600 | -2.01759600 |
| H | -4.85101500 | 2.44147200  | 0.18677400  |
| H | -7.05470800 | 0.56783300  | 0.36561500  |
| H | -3.13479900 | 1.25213000  | -0.84929600 |
| H | -6.75023800 | 1.72419100  | -0.92014900 |
| C | -3.51563900 | -0.69759500 | 1.79442600  |
| C | -1.68768500 | -0.51502100 | 0.47792900  |
| N | -2.62570700 | -1.43568500 | 2.38693200  |

|    |             |             |             |
|----|-------------|-------------|-------------|
| N  | -2.99096000 | -0.13106000 | 0.65969900  |
| N  | -1.52794700 | -1.31282400 | 1.55464400  |
| C  | -4.89221400 | -0.33500600 | 2.23149600  |
| H  | -5.63214900 | -0.94741500 | 1.70018800  |
| H  | -5.00212200 | -0.52894400 | 3.29977600  |
| C  | -0.35168900 | -2.06322600 | 1.87299600  |
| C  | 0.43759200  | -1.63290200 | 2.94483900  |
| C  | -0.03088600 | -3.19521200 | 1.12192400  |
| C  | 1.55925800  | -2.38365100 | 3.27752400  |
| C  | 1.12679500  | -3.89801200 | 1.46790400  |
| C  | 1.92068100  | -3.51900100 | 2.54705600  |
| H  | 2.18461500  | -2.05971900 | 4.10709300  |
| H  | 1.41050900  | -4.76550300 | 0.87497200  |
| C  | 0.10147600  | -0.34960900 | 3.65249200  |
| H  | 0.04597200  | 0.46065000  | 2.91607600  |
| H  | -0.86972400 | -0.40684300 | 4.15244500  |
| H  | 0.86619000  | -0.09988800 | 4.39116300  |
| C  | 3.15321700  | -4.30235200 | 2.91954700  |
| H  | 3.06581300  | -4.71363100 | 3.93003600  |
| H  | 3.31762200  | -5.13024200 | 2.22628900  |
| H  | 4.04261100  | -3.66394600 | 2.90451900  |
| C  | -0.91091600 | -3.70004300 | 0.00751400  |
| H  | -1.64508400 | -4.41573300 | 0.39305900  |
| H  | -1.46186300 | -2.88960100 | -0.47285800 |
| H  | -0.30812900 | -4.21580100 | -0.74589700 |
| C  | 2.02444800  | -1.17463100 | -1.73887900 |
| C  | 2.68342600  | 0.19262300  | -1.85445900 |
| C  | -0.06489000 | 0.10359700  | -2.01250900 |
| C  | 0.69739500  | -1.15715400 | -1.89129600 |
| H  | 2.61910300  | 0.52165700  | -2.89544000 |
| H  | 0.10362200  | -2.06350900 | -1.92771500 |
| O  | -1.11748700 | 0.18215600  | -2.60195900 |
| C  | 2.75380900  | -2.45491200 | -1.58219900 |
| C  | 3.62101800  | -2.67578800 | -0.50501300 |
| C  | 2.50124900  | -3.49829500 | -2.48028000 |
| C  | 4.24266600  | -3.91080400 | -0.35286200 |
| H  | 3.77578400  | -1.89083900 | 0.22785500  |
| C  | 3.11455500  | -4.73724800 | -2.31597100 |
| H  | 1.83102600  | -3.32737600 | -3.31761800 |
| C  | 3.99288500  | -4.94350000 | -1.25539300 |
| H  | 4.91619600  | -4.07177700 | 0.48281400  |
| H  | 2.91387700  | -5.53547000 | -3.02313800 |
| H  | 4.48029700  | -5.90524500 | -1.13090800 |
| Cl | 4.43995700  | 0.21221800  | -1.49456500 |
| C  | -5.08096900 | 1.14829800  | 1.88286800  |
| H  | -4.30298500 | 1.72731900  | 2.39303900  |
| H  | -6.04632700 | 1.50984800  | 2.24784500  |
| C  | 3.14328100  | 3.01659700  | 0.02367800  |
| C  | 2.51367200  | 2.63243900  | -1.16349300 |
| C  | 2.45013000  | 3.49186300  | -2.24101300 |
| C  | 3.05191200  | 4.75256800  | -2.12570200 |
| C  | 3.68963300  | 5.12054300  | -0.94424800 |
| C  | 3.74520000  | 4.25757300  | 0.15741500  |
| C  | 2.29499600  | 0.94456900  | 0.50926800  |
| C  | 1.94919700  | 1.24049900  | -0.98299300 |
| H  | 1.93633700  | 3.19940000  | -3.15262000 |
| H  | 3.01737300  | 5.44438900  | -2.95972900 |

|   |             |             |             |
|---|-------------|-------------|-------------|
| H | 4.15167500  | 6.09947400  | -0.86787200 |
| H | 4.23570500  | 4.55269400  | 1.07904400  |
| N | 3.02818300  | 2.00346300  | 0.97968900  |
| O | 2.05160900  | -0.07750100 | 1.11228700  |
| N | 0.52432000  | 1.20422700  | -1.34175100 |
| C | 3.61818800  | 2.03807900  | 2.29848200  |
| H | 3.34838300  | 1.10862100  | 2.80060600  |
| H | 4.70675200  | 2.11445500  | 2.22606600  |
| H | 3.23473400  | 2.88646500  | 2.87319100  |
| C | -0.34165700 | 2.14661900  | -0.75573100 |
| O | -1.37574500 | 2.52726100  | -1.24505800 |
| O | 0.16787300  | 2.53837300  | 0.41081900  |
| C | -0.47772400 | 3.59401800  | 1.18927700  |
| C | -0.54399100 | 4.87554500  | 0.36536800  |
| C | -1.84410000 | 3.10514400  | 1.65928800  |
| C | 0.47199900  | 3.77131500  | 2.36704800  |
| H | 0.44909000  | 5.10110200  | -0.03880800 |
| H | -1.25540200 | 4.78792100  | -0.45542300 |
| H | -0.84933200 | 5.70189600  | 1.01299300  |
| H | -1.74061500 | 2.14142300  | 2.17025500  |
| H | -2.26605100 | 3.82991700  | 2.36143400  |
| H | -2.52802700 | 2.98721300  | 0.81681100  |
| H | 0.05691000  | 4.49733100  | 3.07029900  |
| H | 0.61918800  | 2.82020800  | 2.88799500  |
| H | 1.44048800  | 4.13886400  | 2.01428500  |

### PRR

|                                              |                |  |              |
|----------------------------------------------|----------------|--|--------------|
| Total energy=                                | -1798.51915092 |  |              |
| Sum of electronic and zero-point Energies=   |                |  | -1798.086538 |
| Sum of electronic and thermal Energies=      |                |  | -1798.058752 |
| Sum of electronic and thermal Enthalpies=    |                |  | -1798.057807 |
| Sum of electronic and thermal Free Energies= |                |  | -1798.144477 |

|   |             |             |             |
|---|-------------|-------------|-------------|
| C | -1.54274700 | -1.85742500 | 0.09873400  |
| C | -1.02977200 | -1.00193100 | -0.88164400 |
| C | -1.41096700 | -1.12546800 | -2.20234000 |
| C | -2.32297800 | -2.13433000 | -2.54046300 |
| C | -2.82323900 | -2.98588300 | -1.55945900 |
| C | -2.44273100 | -2.86227800 | -0.21699400 |
| C | -0.19501800 | -0.43543500 | 1.28118000  |
| C | -0.05837700 | -0.05180300 | -0.22262500 |
| H | -1.02019900 | -0.45031500 | -2.95863300 |
| H | -2.64143300 | -2.25001200 | -3.57030900 |
| H | -3.52657600 | -3.76451300 | -1.83592800 |
| H | -2.83885500 | -3.52793300 | 0.54244000  |
| N | -1.03039500 | -1.51694000 | 1.35615400  |
| O | 0.36106200  | 0.11997800  | 2.20454000  |
| N | -0.38441600 | 1.35628400  | -0.46627700 |
| C | -1.35111300 | -2.19638400 | 2.59210800  |
| H | -0.80612300 | -1.69495200 | 3.39133800  |
| H | -1.04472000 | -3.24455700 | 2.53892000  |
| H | -2.42452400 | -2.14273100 | 2.79601100  |
| C | -1.76430900 | 1.72823200  | -0.49362700 |
| O | -2.20985800 | 2.53121900  | -1.26749900 |
| O | -2.41788000 | 1.05780500  | 0.44596900  |
| C | -3.88545300 | 1.08272900  | 0.51002100  |

|    |             |             |             |
|----|-------------|-------------|-------------|
| C  | -4.45877100 | 0.55626300  | -0.79975200 |
| C  | -4.35601900 | 2.49311300  | 0.84288600  |
| C  | -4.18480300 | 0.12181400  | 1.65249400  |
| H  | -4.03768300 | -0.42996300 | -1.02146600 |
| H  | -4.25063900 | 1.23392900  | -1.62842300 |
| H  | -5.54255700 | 0.45508800  | -0.69497200 |
| H  | -3.87279600 | 2.84423400  | 1.75868800  |
| H  | -5.43676300 | 2.47640300  | 1.00743800  |
| H  | -4.13257600 | 3.18545100  | 0.03122900  |
| H  | -5.25862900 | 0.11383000  | 1.85459900  |
| H  | -3.65652600 | 0.42968500  | 2.55911100  |
| H  | -3.87414300 | -0.89168600 | 1.38263800  |
| C  | 2.37422900  | 0.72316900  | -0.21603100 |
| C  | 1.38183100  | -0.30625700 | -0.71947900 |
| C  | 0.52770500  | 2.37949700  | -0.18289200 |
| C  | 1.93605600  | 1.96839100  | -0.01504700 |
| H  | 1.37476600  | -0.27298100 | -1.81389700 |
| H  | 2.60762500  | 2.76657700  | 0.28078700  |
| O  | 0.18038600  | 3.53860600  | -0.08508600 |
| C  | 3.81990800  | 0.40217700  | -0.08376600 |
| C  | 4.72916800  | 0.91719700  | -1.01145800 |
| C  | 4.28590300  | -0.36323200 | 0.99038200  |
| C  | 6.09069500  | 0.65555900  | -0.87642600 |
| H  | 4.36485000  | 1.51925000  | -1.83872100 |
| C  | 5.64665300  | -0.61491800 | 1.12648300  |
| H  | 3.57928100  | -0.74250800 | 1.72244100  |
| C  | 6.55019100  | -0.11131900 | 0.19047500  |
| H  | 6.79047100  | 1.05529800  | -1.60326300 |
| H  | 6.00277500  | -1.20206100 | 1.96680000  |
| H  | 7.61114300  | -0.31238300 | 0.29811400  |
| Cl | 1.85479900  | -1.99401700 | -0.31494400 |

### PRS

Total energy= -1798.52428579

Sum of electronic and zero-point Energies= -1798.091210

Sum of electronic and thermal Energies= -1798.063504

Sum of electronic and thermal Enthalpies= -1798.062560

Sum of electronic and thermal Free Energies= -1798.149062

|   |             |             |             |
|---|-------------|-------------|-------------|
| C | 1.45865900  | -1.95347000 | 0.26988200  |
| C | 1.01894800  | -1.10736100 | -0.75409700 |
| C | 1.49696800  | -1.26065900 | -2.04253900 |
| C | 2.40237800  | -2.29768400 | -2.30157300 |
| C | 2.81168800  | -3.14898100 | -1.27914700 |
| C | 2.35022100  | -2.98733500 | 0.03229700  |
| C | 0.17570200  | -0.41428700 | 1.37065000  |
| C | 0.04616400  | -0.11265700 | -0.16060000 |
| H | 1.18447300  | -0.58534900 | -2.83192300 |
| H | 2.78960500  | -2.43342800 | -3.30503300 |
| H | 3.51157400  | -3.94940400 | -1.49553200 |
| H | 2.68577300  | -3.63977100 | 0.83121700  |
| N | 0.91204600  | -1.56032400 | 1.49856600  |
| O | -0.32146400 | 0.23356400  | 2.26542800  |
| N | 0.35508300  | 1.27959700  | -0.46892000 |
| C | 1.23177700  | -2.16669200 | 2.77366400  |
| H | 0.68525100  | -1.62143900 | 3.54241600  |

|    |             |             |             |
|----|-------------|-------------|-------------|
| H  | 0.92783900  | -3.21615700 | 2.77985900  |
| H  | 2.30508600  | -2.09957300 | 2.97528600  |
| C  | 1.73151200  | 1.66319400  | -0.47785300 |
| O  | 2.19008400  | 2.45671000  | -1.25339600 |
| O  | 2.36772700  | 1.01340600  | 0.48996900  |
| C  | 3.83108700  | 1.05339700  | 0.60209000  |
| C  | 4.45118600  | 0.49479800  | -0.67225700 |
| C  | 4.28016000  | 2.47634900  | 0.90996700  |
| C  | 4.09634300  | 0.12676600  | 1.78067700  |
| H  | 4.06656500  | -0.51220700 | -0.86392900 |
| H  | 4.23940100  | 1.13267800  | -1.53177300 |
| H  | 5.53509900  | 0.43414600  | -0.54123000 |
| H  | 3.75798800  | 2.85134900  | 1.79441200  |
| H  | 5.35330000  | 2.47187400  | 1.11856000  |
| H  | 4.08551000  | 3.14235500  | 0.06940700  |
| H  | 5.16348300  | 0.12430400  | 2.01539000  |
| H  | 3.54051200  | 0.46072300  | 2.66133500  |
| H  | 3.79238000  | -0.89416500 | 1.53033000  |
| C  | -2.38423000 | 0.60655600  | -0.05700500 |
| C  | -1.41001300 | -0.43419400 | -0.53877300 |
| C  | -0.56992900 | 2.29626700  | -0.19362700 |
| C  | -1.95844100 | 1.86830400  | 0.07202300  |
| H  | -1.64735900 | -1.42789700 | -0.15590500 |
| H  | -2.61672600 | 2.66743700  | 0.39440600  |
| O  | -0.24463100 | 3.46623400  | -0.16098300 |
| C  | -3.79027200 | 0.20743800  | 0.16733800  |
| C  | -4.83202700 | 1.03504300  | -0.26817800 |
| C  | -4.09929100 | -0.98544800 | 0.83167400  |
| C  | -6.15616300 | 0.67948300  | -0.03734600 |
| H  | -4.59779600 | 1.94603300  | -0.81030900 |
| C  | -5.42465000 | -1.33561300 | 1.06685400  |
| H  | -3.30524200 | -1.62940400 | 1.19890500  |
| C  | -6.45535000 | -0.50568700 | 0.63149400  |
| H  | -6.95526100 | 1.32447500  | -0.38741700 |
| H  | -5.65193200 | -2.25594000 | 1.59436700  |
| H  | -7.48894300 | -0.78306300 | 0.81068600  |
| Cl | -1.64581100 | -0.56982100 | -2.33428700 |

### PSR

|                                              |                |  |              |
|----------------------------------------------|----------------|--|--------------|
| Total energy=                                | -1798.52428579 |  |              |
| Sum of electronic and zero-point Energies=   |                |  | -1798.091210 |
| Sum of electronic and thermal Energies=      |                |  | -1798.063504 |
| Sum of electronic and thermal Enthalpies=    |                |  | -1798.062560 |
| Sum of electronic and thermal Free Energies= |                |  | -1798.149062 |

|   |             |             |             |
|---|-------------|-------------|-------------|
| C | -1.45865900 | -1.95347000 | 0.26988200  |
| C | -1.01894800 | -1.10736100 | -0.75409700 |
| C | -1.49696800 | -1.26065900 | -2.04253900 |
| C | -2.40237800 | -2.29768400 | -2.30157300 |
| C | -2.81168800 | -3.14898100 | -1.27914700 |
| C | -2.35022100 | -2.98733500 | 0.03229700  |
| C | -0.17570200 | -0.41428700 | 1.37065000  |
| C | -0.04616400 | -0.11265700 | -0.16060000 |
| H | -1.18447300 | -0.58534900 | -2.83192300 |
| H | -2.78960500 | -2.43342800 | -3.30503300 |
| H | -3.51157400 | -3.94940400 | -1.49553200 |

|    |             |             |             |
|----|-------------|-------------|-------------|
| H  | -2.68577300 | -3.63977100 | 0.83121700  |
| N  | -0.91204600 | -1.56032400 | 1.49856600  |
| O  | 0.32146400  | 0.23356400  | 2.26542800  |
| N  | -0.35508300 | 1.27959700  | -0.46892000 |
| C  | -1.23177700 | -2.16669200 | 2.77366500  |
| H  | -0.68525100 | -1.62143900 | 3.54241600  |
| H  | -0.92783900 | -3.21615700 | 2.77985900  |
| H  | -2.30508600 | -2.09957300 | 2.97528600  |
| C  | -1.73151200 | 1.66319400  | -0.47785300 |
| O  | -2.19008400 | 2.45671000  | -1.25339600 |
| O  | -2.36772700 | 1.01340600  | 0.48996900  |
| C  | -3.83108700 | 1.05339700  | 0.60209000  |
| C  | -4.45118600 | 0.49479800  | -0.67225700 |
| C  | -4.28016000 | 2.47634900  | 0.90996600  |
| C  | -4.09634300 | 0.12676600  | 1.78067700  |
| H  | -4.06656500 | -0.51220700 | -0.86392900 |
| H  | -4.23940100 | 1.13267800  | -1.53177300 |
| H  | -5.53509900 | 0.43414600  | -0.54123000 |
| H  | -3.75798800 | 2.85134900  | 1.79441100  |
| H  | -5.35330000 | 2.47187400  | 1.11855900  |
| H  | -4.08551000 | 3.14235500  | 0.06940700  |
| H  | -5.16348300 | 0.12430400  | 2.01539000  |
| H  | -3.54051200 | 0.46072300  | 2.66133500  |
| H  | -3.79238000 | -0.89416500 | 1.53033000  |
| C  | 2.38423000  | 0.60655600  | -0.05700500 |
| C  | 1.41001300  | -0.43419400 | -0.53877300 |
| C  | 0.56992900  | 2.29626700  | -0.19362700 |
| C  | 1.95844100  | 1.86830400  | 0.07202300  |
| H  | 1.64735900  | -1.42789700 | -0.15590500 |
| H  | 2.61672600  | 2.66743700  | 0.39440600  |
| O  | 0.24463100  | 3.46623400  | -0.16098300 |
| C  | 3.79027200  | 0.20743800  | 0.16733800  |
| C  | 4.83202700  | 1.03504300  | -0.26817800 |
| C  | 4.09929100  | -0.98544800 | 0.83167400  |
| C  | 6.15616300  | 0.67948300  | -0.03734600 |
| H  | 4.59779600  | 1.94603300  | -0.81030900 |
| C  | 5.42465000  | -1.33561300 | 1.06685400  |
| H  | 3.30524200  | -1.62940400 | 1.19890500  |
| C  | 6.45535000  | -0.50568700 | 0.63149400  |
| H  | 6.95526100  | 1.32447500  | -0.38741700 |
| H  | 5.65193200  | -2.25594000 | 1.59436700  |
| H  | 7.48894300  | -0.78306300 | 0.81068600  |
| Cl | 1.64581100  | -0.56982100 | -2.33428700 |

## PSS

|                                              |                |              |
|----------------------------------------------|----------------|--------------|
| Total energy=                                | -1798.51915092 |              |
| Sum of electronic and zero-point Energies=   |                | -1798.086538 |
| Sum of electronic and thermal Energies=      |                | -1798.058752 |
| Sum of electronic and thermal Enthalpies=    |                | -1798.057807 |
| Sum of electronic and thermal Free Energies= |                | -1798.144477 |

|   |            |             |             |
|---|------------|-------------|-------------|
| C | 1.54274700 | -1.85742500 | 0.09873400  |
| C | 1.02977200 | -1.00193100 | -0.88164400 |
| C | 1.41096700 | -1.12546800 | -2.20234000 |
| C | 2.32297800 | -2.13433000 | -2.54046300 |
| C | 2.82323900 | -2.98588300 | -1.55945900 |

|    |             |             |             |
|----|-------------|-------------|-------------|
| C  | 2.44273100  | -2.86227800 | -0.21699400 |
| C  | 0.19501800  | -0.43543500 | 1.28118000  |
| C  | 0.05837700  | -0.05180300 | -0.22262500 |
| H  | 1.02019900  | -0.45031500 | -2.95863300 |
| H  | 2.64143300  | -2.25001200 | -3.57030900 |
| H  | 3.52657600  | -3.76451300 | -1.83592800 |
| H  | 2.83885500  | -3.52793300 | 0.54244000  |
| N  | 1.03039500  | -1.51694000 | 1.35615400  |
| O  | -0.36106200 | 0.11997800  | 2.20454000  |
| N  | 0.38441600  | 1.35628400  | -0.46627700 |
| C  | 1.35111300  | -2.19638400 | 2.59210700  |
| H  | 0.80612300  | -1.69495200 | 3.39133800  |
| H  | 1.04472000  | -3.24455800 | 2.53892000  |
| H  | 2.42452400  | -2.14273100 | 2.79601100  |
| C  | 1.76430900  | 1.72823200  | -0.49362700 |
| O  | 2.20985800  | 2.53121900  | -1.26749900 |
| O  | 2.41788000  | 1.05780500  | 0.44596900  |
| C  | 3.88545300  | 1.08272900  | 0.51002100  |
| C  | 4.45877100  | 0.55626300  | -0.79975200 |
| C  | 4.35601900  | 2.49311300  | 0.84288600  |
| C  | 4.18480300  | 0.12181400  | 1.65249400  |
| H  | 4.03768300  | -0.42996300 | -1.02146600 |
| H  | 4.25063900  | 1.23392900  | -1.62842300 |
| H  | 5.54255700  | 0.45508800  | -0.69497200 |
| H  | 3.87279600  | 2.84423400  | 1.75868800  |
| H  | 5.43676300  | 2.47640300  | 1.00743800  |
| H  | 4.13257600  | 3.18545100  | 0.03122900  |
| H  | 5.25862900  | 0.11383000  | 1.85459900  |
| H  | 3.65652700  | 0.42968500  | 2.55911100  |
| H  | 3.87414300  | -0.89168600 | 1.38263800  |
| C  | -2.37422900 | 0.72316900  | -0.21603100 |
| C  | -1.38183100 | -0.30625700 | -0.71947900 |
| C  | -0.52770500 | 2.37949700  | -0.18289200 |
| C  | -1.93605600 | 1.96839100  | -0.01504700 |
| H  | -1.37476600 | -0.27298100 | -1.81389700 |
| H  | -2.60762500 | 2.76657700  | 0.28078700  |
| O  | -0.18038600 | 3.53860600  | -0.08508600 |
| C  | -3.81990800 | 0.40217700  | -0.08376600 |
| C  | -4.72916800 | 0.91719700  | -1.01145800 |
| C  | -4.28590300 | -0.36323200 | 0.99038200  |
| C  | -6.09069500 | 0.65555900  | -0.87642600 |
| H  | -4.36485000 | 1.51925000  | -1.83872000 |
| C  | -5.64665300 | -0.61491800 | 1.12648300  |
| H  | -3.57928100 | -0.74250800 | 1.72244100  |
| C  | -6.55019100 | -0.11131900 | 0.19047500  |
| H  | -6.79047100 | 1.05529800  | -1.60326300 |
| H  | -6.00277500 | -1.20206100 | 1.96680000  |
| H  | -7.61114300 | -0.31238300 | 0.29811400  |
| Cl | -1.85479900 | -1.99401700 | -0.31494400 |

### ***E-TS1<sup>D</sup>***

Total energy= -920.38577374

Sum of electronic and zero-point Energies= -920.246533

Sum of electronic and thermal Energies= -920.236669

Sum of electronic and thermal Enthalpies= -920.235724

Sum of electronic and thermal Free Energies= -920.283227

|    |             |             |             |
|----|-------------|-------------|-------------|
| C  | -0.42206400 | -0.19679700 | -0.16988700 |
| C  | -1.36161900 | 0.63071300  | 0.48822600  |
| C  | -2.17725100 | -1.29026900 | 0.17923200  |
| C  | -1.12950800 | -1.28921300 | -0.71207600 |
| H  | -1.07000400 | 1.20459600  | 1.36292600  |
| H  | -0.95739200 | -1.95122400 | -1.55067000 |
| O  | -3.03706600 | -1.73414900 | 0.84127400  |
| C  | 1.03187900  | -0.07944600 | -0.05748800 |
| C  | 1.61517800  | 1.16389300  | 0.22076600  |
| C  | 1.85095700  | -1.20051700 | -0.25095700 |
| C  | 2.99736300  | 1.28196100  | 0.30632100  |
| H  | 0.97995000  | 2.03610500  | 0.34321700  |
| C  | 3.23204700  | -1.07663100 | -0.17679700 |
| H  | 1.39408800  | -2.16838000 | -0.43595700 |
| C  | 3.80518700  | 0.16369700  | 0.10539300  |
| H  | 3.44642300  | 2.24643600  | 0.51818800  |
| H  | 3.86313900  | -1.94633600 | -0.32603800 |
| H  | 4.88441600  | 0.25814100  | 0.16935900  |
| Cl | -2.64100700 | 1.50291200  | -0.37691800 |

### Z-TS1<sup>D</sup>

|                                              |               |             |
|----------------------------------------------|---------------|-------------|
| Total energy=                                | -920.39933772 |             |
| Sum of electronic and zero-point Energies=   |               | -920.260085 |
| Sum of electronic and thermal Energies=      |               | -920.250242 |
| Sum of electronic and thermal Enthalpies=    |               | -920.249297 |
| Sum of electronic and thermal Free Energies= |               | -920.296611 |

|    |             |             |             |
|----|-------------|-------------|-------------|
| C  | -0.60784100 | -0.38935800 | 0.48214200  |
| C  | -1.60812700 | 0.59993400  | 0.50123800  |
| C  | -2.51443000 | -1.23095700 | 0.07944100  |
| C  | -1.30685500 | -1.60995700 | 0.61872800  |
| H  | -2.26604000 | 0.71699800  | 1.34973700  |
| H  | -1.03686300 | -2.55597400 | 1.07162300  |
| O  | -3.50914100 | -1.35039000 | -0.53309700 |
| C  | 0.82517500  | -0.26322600 | 0.20429100  |
| C  | 1.51398300  | 0.91595800  | 0.52049700  |
| C  | 1.52789800  | -1.35115900 | -0.32875600 |
| C  | 2.88351000  | 1.00077400  | 0.30504000  |
| H  | 0.97320000  | 1.75264100  | 0.95077200  |
| C  | 2.89903300  | -1.26363600 | -0.54049100 |
| H  | 0.98689200  | -2.25466600 | -0.59381800 |
| C  | 3.57655900  | -0.08717300 | -0.22599100 |
| H  | 3.41394800  | 1.91334700  | 0.55514000  |
| H  | 3.43715700  | -2.10810100 | -0.95787100 |
| H  | 4.64605900  | -0.01622300 | -0.39582000 |
| Cl | -1.48321500 | 2.08399400  | -0.43599000 |

### E-M1<sup>D</sup>

|                                              |               |             |
|----------------------------------------------|---------------|-------------|
| Total energy=                                | -920.43721708 |             |
| Sum of electronic and zero-point Energies=   |               | -920.297126 |
| Sum of electronic and thermal Energies=      |               | -920.286598 |
| Sum of electronic and thermal Enthalpies=    |               | -920.285654 |
| Sum of electronic and thermal Free Energies= |               | -920.334775 |



|    |             |             |             |
|----|-------------|-------------|-------------|
| C  | -0.40718800 | -0.06545400 | 0.05928800  |
| C  | -0.99995400 | -1.22117100 | -0.27662600 |
| C  | -2.37539100 | 1.45983300  | 0.28242900  |
| C  | -1.09156400 | 1.16839800  | 0.44048500  |
| H  | -0.45554300 | -2.09422800 | -0.60764300 |
| H  | -0.52712200 | 1.96706300  | 0.91059800  |
| O  | -3.47801400 | 1.80573100  | 0.17122300  |
| C  | 1.08142300  | -0.00664300 | 0.03558900  |
| C  | 1.84917400  | -1.08369000 | 0.49266100  |
| C  | 1.73449700  | 1.13013000  | -0.45444300 |
| C  | 3.23864200  | -1.03215800 | 0.44145800  |
| H  | 1.35342300  | -1.95350000 | 0.91267000  |
| C  | 3.12393500  | 1.18095700  | -0.50252500 |
| H  | 1.14879200  | 1.97002400  | -0.81655400 |
| C  | 3.88036400  | 0.09935700  | -0.05675900 |
| H  | 3.82063100  | -1.87343200 | 0.80375800  |
| H  | 3.61560400  | 2.06619800  | -0.89276400 |
| H  | 4.96408500  | 0.14094100  | -0.09108600 |
| Cl | -2.72349300 | -1.43801600 | -0.25635900 |

### Z-M1<sup>D</sup>

|                                              |               |  |             |
|----------------------------------------------|---------------|--|-------------|
| Total energy=                                | -920.43225474 |  |             |
| Sum of electronic and zero-point Energies=   |               |  | -920.291886 |
| Sum of electronic and thermal Energies=      |               |  | -920.281311 |
| Sum of electronic and thermal Enthalpies=    |               |  | -920.280366 |
| Sum of electronic and thermal Free Energies= |               |  | -920.329841 |

|    |             |             |             |
|----|-------------|-------------|-------------|
| C  | -0.79741500 | -0.02876300 | 0.32382200  |
| C  | -1.41675000 | 1.15103700  | 0.16676000  |
| C  | -2.81127600 | -1.40733500 | 0.17004200  |
| C  | -1.60321100 | -1.21648100 | 0.67092000  |
| H  | -2.47086000 | 1.28783100  | 0.37331300  |
| H  | -1.21520800 | -1.99095800 | 1.32255500  |
| O  | -3.86909600 | -1.58175100 | -0.27988600 |
| C  | 0.66027600  | -0.26330200 | 0.15381300  |
| C  | 1.60588200  | 0.60957100  | 0.70397500  |
| C  | 1.10242600  | -1.40209000 | -0.52825900 |
| C  | 2.96554200  | 0.35675300  | 0.55535800  |
| H  | 1.27277000  | 1.47778400  | 1.26276600  |
| C  | 2.46283700  | -1.64838200 | -0.68447900 |
| H  | 0.37113100  | -2.08962000 | -0.94275900 |
| C  | 3.39784900  | -0.76879000 | -0.14338200 |
| H  | 3.68899500  | 1.03798400  | 0.99137500  |
| H  | 2.79163300  | -2.52941600 | -1.22608900 |
| H  | 4.45921000  | -0.96289500 | -0.25974500 |
| Cl | -0.66716800 | 2.59588100  | -0.44786800 |

### TS2<sup>DRR</sup>

|                                              |                |  |              |
|----------------------------------------------|----------------|--|--------------|
| Total energy=                                | -1798.41562708 |  |              |
| Sum of electronic and zero-point Energies=   |                |  | -1797.988973 |
| Sum of electronic and thermal Energies=      |                |  | -1797.960102 |
| Sum of electronic and thermal Enthalpies=    |                |  | -1797.959157 |
| Sum of electronic and thermal Free Energies= |                |  | -1798.050074 |

|   |             |            |             |
|---|-------------|------------|-------------|
| C | -1.63188100 | 2.29917600 | -0.82902600 |
|---|-------------|------------|-------------|

|    |             |             |             |
|----|-------------|-------------|-------------|
| C  | -1.70278300 | 1.72870700  | 0.45232400  |
| C  | -2.33712000 | 2.39307300  | 1.49068700  |
| C  | -2.89145900 | 3.64850800  | 1.23261500  |
| C  | -2.80822400 | 4.20968800  | -0.04267900 |
| C  | -2.17934300 | 3.54274000  | -1.09919300 |
| C  | -0.57898700 | 0.27962600  | -1.06883200 |
| C  | -1.03352500 | 0.42944000  | 0.37276200  |
| H  | -2.39524600 | 1.93947100  | 2.47604000  |
| H  | -3.39229300 | 4.19061500  | 2.02691300  |
| H  | -3.24439800 | 5.18667500  | -0.22351700 |
| H  | -2.12292100 | 3.98396600  | -2.08837400 |
| N  | -0.96760100 | 1.43144500  | -1.70669700 |
| O  | 0.04033800  | -0.64934200 | -1.55698400 |
| N  | -1.10213500 | -0.54529700 | 1.24955200  |
| C  | -0.64175100 | 1.74037200  | -3.08099800 |
| H  | 0.00950900  | 2.61815800  | -3.12997900 |
| H  | -1.55097500 | 1.93005700  | -3.65739100 |
| H  | -0.12246600 | 0.87649900  | -3.49602900 |
| C  | -1.15729900 | -1.89384400 | 0.86877800  |
| O  | -0.61109500 | -2.78511300 | 1.48641900  |
| O  | -2.00513900 | -2.05050000 | -0.14613300 |
| C  | -2.17354300 | -3.35634800 | -0.78434700 |
| C  | -2.87975100 | -4.30607000 | 0.17581300  |
| C  | -0.82630200 | -3.89273000 | -1.25654700 |
| C  | -3.06257600 | -3.02246700 | -1.97575700 |
| H  | -3.81566000 | -3.86143900 | 0.52585100  |
| H  | -2.24711500 | -4.53336800 | 1.03408000  |
| H  | -3.11518900 | -5.23722800 | -0.34736900 |
| H  | -0.30472800 | -3.11955500 | -1.82591500 |
| H  | -0.99762900 | -4.75876000 | -1.90220400 |
| H  | -0.20363000 | -4.19819000 | -0.41569200 |
| H  | -3.28454800 | -3.93118300 | -2.54048000 |
| H  | -2.55540000 | -2.31143000 | -2.63352300 |
| H  | -4.00344200 | -2.58087200 | -1.63676400 |
| C  | 1.80171000  | 0.26613700  | 1.11043600  |
| C  | 1.06141600  | 1.43041000  | 0.98739900  |
| C  | 0.21959100  | -0.55983800 | 2.79663700  |
| C  | 1.37987800  | -0.68732000 | 2.05085000  |
| H  | 0.42861100  | 1.76510400  | 1.79831000  |
| H  | 1.80444800  | -1.68537400 | 2.07276500  |
| O  | -0.38783600 | -0.48154300 | 3.78278900  |
| C  | 3.00086800  | -0.06450900 | 0.29517500  |
| C  | 4.12707400  | -0.58422000 | 0.94429400  |
| C  | 3.03556400  | 0.11506600  | -1.09187100 |
| C  | 5.27021600  | -0.91260700 | 0.22252100  |
| H  | 4.11155100  | -0.71308300 | 2.02257500  |
| C  | 4.17871700  | -0.22065600 | -1.81033100 |
| H  | 2.15821900  | 0.48144900  | -1.61136400 |
| C  | 5.29858800  | -0.73091900 | -1.15777100 |
| H  | 6.13825300  | -1.30742200 | 0.74017500  |
| H  | 4.19043300  | -0.08771100 | -2.88721400 |
| H  | 6.18848400  | -0.98778100 | -1.72309100 |
| Cl | 1.51233300  | 2.75069800  | -0.04259700 |

### TS2<sup>PRS</sup>

Total energy= -1798.40503487

Sum of electronic and zero-point Energies= -1797.977921

|                                              |              |
|----------------------------------------------|--------------|
| Sum of electronic and thermal Energies=      | -1797.949355 |
| Sum of electronic and thermal Enthalpies=    | -1797.948411 |
| Sum of electronic and thermal Free Energies= | -1798.036660 |

|   |             |             |             |
|---|-------------|-------------|-------------|
| C | -0.21930200 | 2.24064800  | 0.22212400  |
| C | -0.35560600 | 1.00237200  | 0.86580800  |
| C | -1.13591500 | 0.87481400  | 2.00078600  |
| C | -1.83815900 | 1.99670900  | 2.45253700  |
| C | -1.73678100 | 3.21129900  | 1.77537600  |
| C | -0.91500000 | 3.35991700  | 0.65130800  |
| C | 1.16908300  | 0.85658800  | -0.96640900 |
| C | 0.49251500  | 0.03422100  | 0.14287600  |
| H | -1.20877300 | -0.08278500 | 2.50801200  |
| H | -2.47121900 | 1.92194700  | 3.32982400  |
| H | -2.29442200 | 4.07061900  | 2.13360900  |
| H | -0.81789400 | 4.31662900  | 0.14938000  |
| N | 0.70319900  | 2.13803500  | -0.82944200 |
| O | 1.89990700  | 0.44275900  | -1.84567800 |
| N | 1.02821700  | -1.03538800 | 0.72983800  |
| C | 0.98959500  | 3.19415400  | -1.77449100 |
| H | 1.71700000  | 2.80615600  | -2.48690900 |
| H | 1.40607200  | 4.06475400  | -1.26139500 |
| H | 0.07839300  | 3.48552600  | -2.30595400 |
| C | 2.38447000  | -1.25990900 | 0.70789400  |
| O | 2.90335600  | -2.35281000 | 0.84522200  |
| O | 3.07648700  | -0.09635200 | 0.66801600  |
| C | 4.50867200  | -0.08649400 | 0.42236000  |
| C | 4.84734700  | -0.88549400 | -0.83337600 |
| C | 5.24852200  | -0.59964900 | 1.65298100  |
| C | 4.78980800  | 1.39448600  | 0.19104900  |
| H | 4.19890700  | -0.56282400 | -1.65228700 |
| H | 4.71462300  | -1.95468100 | -0.66936800 |
| H | 5.88879700  | -0.69483000 | -1.10825800 |
| H | 4.96212200  | -0.01706400 | 2.53335800  |
| H | 6.32708900  | -0.49227100 | 1.50390100  |
| H | 5.01611800  | -1.65037100 | 1.82815400  |
| H | 5.85558400  | 1.55190600  | 0.00598600  |
| H | 4.49496100  | 1.97933100  | 1.06664100  |
| H | 4.22197900  | 1.74543900  | -0.67577500 |
| C | -1.71894900 | -1.46208800 | -0.44092700 |
| C | -0.83144200 | -0.75709000 | -1.28260100 |
| C | 0.03316600  | -3.06469300 | -0.01190200 |
| C | -1.22671900 | -2.57688700 | 0.24000200  |
| H | 0.01497300  | -1.27957300 | -1.71737500 |
| H | -1.73583000 | -3.02488600 | 1.08663800  |
| O | 0.89545500  | -3.75150600 | -0.32904400 |
| C | -3.11636600 | -1.06023600 | -0.15347000 |
| C | -4.07228200 | -2.06826500 | 0.04057900  |
| C | -3.51343000 | 0.28031400  | -0.04180900 |
| C | -5.39018000 | -1.74744100 | 0.34451500  |
| H | -3.78531800 | -3.10871700 | -0.07693600 |
| C | -4.82933500 | 0.59474800  | 0.27761800  |
| H | -2.79419700 | 1.07985000  | -0.17347600 |
| C | -5.77099300 | -0.41383700 | 0.46961200  |
| H | -6.11880900 | -2.53945100 | 0.47995800  |
| H | -5.11553400 | 1.63631200  | 0.38010300  |
| H | -6.79828900 | -0.16144100 | 0.71142100  |

|    |             |            |             |
|----|-------------|------------|-------------|
| Cl | -1.46083500 | 0.40623700 | -2.43028200 |
|----|-------------|------------|-------------|

**TS2<sup>DSR</sup>**

Total energy= -1798.41547400

Sum of electronic and zero-point Energies= -1797.988280

Sum of electronic and thermal Energies= -1797.959700

Sum of electronic and thermal Enthalpies= -1797.958756

Sum of electronic and thermal Free Energies= -1798.047331

|   |             |             |             |
|---|-------------|-------------|-------------|
| C | 0.18856700  | -2.26035000 | -1.00088000 |
| C | -0.24857000 | -0.95129300 | -0.73897300 |
| C | -0.26973600 | 0.00171900  | -1.74700100 |
| C | 0.14985300  | -0.37013500 | -3.02532800 |
| C | 0.59188100  | -1.67153200 | -3.27094500 |
| C | 0.62249100  | -2.64008900 | -2.26239900 |
| C | -0.31425600 | -2.28530400 | 1.23303300  |
| C | -0.55348400 | -0.88852000 | 0.69218200  |
| H | -0.57938600 | 1.02159200  | -1.53639500 |
| H | 0.14593400  | 0.35861800  | -3.82838900 |
| H | 0.92096200  | -1.94291000 | -4.26872800 |
| H | 0.96720600  | -3.64885700 | -2.46237400 |
| N | 0.10686300  | -3.03631000 | 0.15966600  |
| O | -0.44683400 | -2.67324300 | 2.37857200  |
| N | -1.26030300 | -0.00222300 | 1.36772700  |
| C | 0.56351700  | -4.40366000 | 0.26887800  |
| H | 0.41465800  | -4.71520400 | 1.30245200  |
| H | -0.01069700 | -5.05444900 | -0.39529500 |
| H | 1.62611600  | -4.47051000 | 0.01614900  |
| C | -2.15173900 | 0.88692600  | 0.76150200  |
| O | -2.30080800 | 2.03539800  | 1.13256500  |
| O | -2.87636800 | 0.27127700  | -0.17256800 |
| C | -3.95674100 | 0.96547800  | -0.87650200 |
| C | -5.03694700 | 1.37655600  | 0.11749800  |
| C | -3.40474300 | 2.15143400  | -1.65969200 |
| C | -4.47117500 | -0.10927900 | -1.82569400 |
| H | -5.34508600 | 0.51180700  | 0.71173900  |
| H | -4.68262700 | 2.16227000  | 0.78475300  |
| H | -5.90759600 | 1.74343100  | -0.43298900 |
| H | -2.64866100 | 1.81394600  | -2.37464400 |
| H | -4.21957800 | 2.61427300  | -2.22329700 |
| H | -2.97104400 | 2.89822100  | -0.99430000 |
| H | -5.28189400 | 0.29386400  | -2.43755500 |
| H | -3.66558900 | -0.44632300 | -2.48391600 |
| H | -4.84755300 | -0.96712400 | -1.26273700 |
| C | 1.58242200  | 0.90256700  | 1.24686400  |
| C | 1.57741600  | -0.44209800 | 1.59745900  |
| C | -0.34727700 | 1.22138100  | 2.70205400  |
| C | 0.61480000  | 1.72627400  | 1.83663200  |
| H | 1.10758300  | -0.77569400 | 2.51554200  |
| H | 0.41666600  | 2.73186900  | 1.48198900  |
| O | -0.89384200 | 1.13133700  | 3.71975600  |
| C | 2.47692600  | 1.50800000  | 0.22599300  |
| C | 3.00093700  | 2.78637400  | 0.45419400  |
| C | 2.78078700  | 0.85334500  | -0.97429500 |
| C | 3.81132600  | 3.39852000  | -0.49635600 |
| H | 2.78810500  | 3.29306500  | 1.39086900  |

|    |            |             |             |
|----|------------|-------------|-------------|
| C  | 3.58233400 | 1.47368000  | -1.92670300 |
| H  | 2.37382800 | -0.13095700 | -1.17575600 |
| C  | 4.10133400 | 2.74457700  | -1.69152600 |
| H  | 4.21784000 | 4.38540000  | -0.30119100 |
| H  | 3.79628700 | 0.95985800  | -2.85832100 |
| H  | 4.73056700 | 3.22260700  | -2.43524100 |
| Cl | 2.79595900 | -1.56203700 | 1.07466400  |

### TS2<sup>DSS</sup>

|                                              |                |
|----------------------------------------------|----------------|
| Total energy=                                | -1798.40081894 |
| Sum of electronic and zero-point Energies=   | -1797.973831   |
| Sum of electronic and thermal Energies=      | -1797.945226   |
| Sum of electronic and thermal Enthalpies=    | -1797.944282   |
| Sum of electronic and thermal Free Energies= | -1798.033242   |

|   |             |             |             |
|---|-------------|-------------|-------------|
| C | -0.39494700 | 2.31928400  | 0.25848400  |
| C | -0.99670100 | 1.19977900  | -0.33360700 |
| C | -1.92403700 | 1.36555900  | -1.35085500 |
| C | -2.26813500 | 2.65982700  | -1.74320000 |
| C | -1.68137800 | 3.76516200  | -1.12366100 |
| C | -0.73061100 | 3.61345600  | -0.11240100 |
| C | 0.58442500  | 0.54931700  | 1.32844600  |
| C | -0.36399600 | -0.00023100 | 0.26469500  |
| H | -2.37878400 | 0.49976100  | -1.82302100 |
| H | -2.99917700 | 2.80840300  | -2.53030700 |
| H | -1.96374200 | 4.76528700  | -1.43600800 |
| H | -0.26666700 | 4.47396400  | 0.35746400  |
| N | 0.54822400  | 1.91983800  | 1.21341100  |
| O | 1.24629400  | -0.08824000 | 2.12257000  |
| N | -0.82925500 | -1.24023500 | 0.44670300  |
| C | 1.32148400  | 2.81947500  | 2.04026800  |
| H | 1.95075700  | 2.20658700  | 2.68645900  |
| H | 1.95089500  | 3.46364700  | 1.41903500  |
| H | 0.66586300  | 3.44193100  | 2.65555500  |
| C | -2.15161000 | -1.60061200 | 0.37351100  |
| O | -2.52353900 | -2.75541500 | 0.25510600  |
| O | -2.99161300 | -0.55945400 | 0.56323700  |
| C | -4.43339000 | -0.74555600 | 0.55909400  |
| C | -4.89767700 | -1.29816600 | -0.78573100 |
| C | -4.85708100 | -1.63675400 | 1.72310300  |
| C | -4.94954300 | 0.67578800  | 0.75659800  |
| H | -4.56151100 | -0.64503400 | -1.59719600 |
| H | -4.51105100 | -2.30400300 | -0.94891500 |
| H | -5.99087500 | -1.32760200 | -0.80559800 |
| H | -4.44365800 | -1.24768000 | 2.65807000  |
| H | -5.94808500 | -1.63362500 | 1.80245600  |
| H | -4.51264500 | -2.66027400 | 1.57797300  |
| H | -6.04260100 | 0.68203000  | 0.75612300  |
| H | -4.59494800 | 1.07829500  | 1.70924200  |
| H | -4.58931500 | 1.32270100  | -0.04871100 |
| C | 1.99233400  | -1.16545800 | -0.63070500 |
| C | 1.10416600  | -0.23825700 | -1.22637600 |
| C | 0.27283700  | -2.83347000 | -0.83993400 |
| C | 1.51590500  | -2.45087700 | -0.38542500 |
| H | 0.31299400  | -0.62450700 | -1.85972500 |
| H | 2.00000800  | -3.14036300 | 0.29764600  |

|    |             |             |             |
|----|-------------|-------------|-------------|
| O  | -0.53427400 | -3.38964700 | -1.43940700 |
| C  | 3.36726000  | -0.85370900 | -0.17736900 |
| C  | 4.35145300  | -1.84275200 | -0.30927500 |
| C  | 3.71826600  | 0.37978500  | 0.38797200  |
| C  | 5.65380800  | -1.60895100 | 0.11786400  |
| H  | 4.09899300  | -2.79044300 | -0.77510500 |
| C  | 5.01856200  | 0.60592200  | 0.82214700  |
| H  | 2.97340200  | 1.15694700  | 0.50664200  |
| C  | 5.98977600  | -0.38471800 | 0.68877500  |
| H  | 6.40506000  | -2.38229200 | -0.00108000 |
| H  | 5.27197900  | 1.56063000  | 1.27115200  |
| H  | 7.00474900  | -0.20056800 | 1.02544300  |
| Cl | 1.71256500  | 1.25399800  | -1.90264400 |

### TS3c-oRR

|                                              |                |
|----------------------------------------------|----------------|
| Total energy=                                | -2814.50077753 |
| Sum of electronic and zero-point Energies=   | -2813.661904   |
| Sum of electronic and thermal Energies=      | -2813.612339   |
| Sum of electronic and thermal Enthalpies=    | -2813.611395   |
| Sum of electronic and thermal Free Energies= | -2813.746586   |

|   |             |             |             |
|---|-------------|-------------|-------------|
| C | 4.82690000  | -1.56690500 | -0.75927100 |
| C | 5.88502300  | -2.42569900 | -0.48740000 |
| C | 7.11508800  | -2.22808500 | -1.11187000 |
| C | 7.25659400  | -1.16595200 | -2.00108500 |
| C | 6.18576700  | -0.30789300 | -2.26964000 |
| C | 4.95547500  | -0.50264500 | -1.64772800 |
| C | 3.59861200  | -1.95192600 | 0.03599900  |
| C | 4.06779800  | -3.10191500 | 0.99175100  |
| C | 5.48958000  | -3.49359700 | 0.49845300  |
| H | 7.95171900  | -2.88832200 | -0.90394600 |
| H | 8.21093900  | -0.99965200 | -2.49027200 |
| H | 6.31412900  | 0.51346400  | -2.96655900 |
| H | 4.11917100  | 0.16309900  | -1.85349300 |
| H | 3.38513600  | -3.94483500 | 0.87532500  |
| H | 6.19869700  | -3.56183700 | 1.33069600  |
| H | 2.78184800  | -2.27138700 | -0.61139700 |
| H | 5.47433100  | -4.47625600 | 0.01700400  |
| C | 3.74518200  | -0.34622000 | 1.93557800  |
| C | 2.32576100  | 0.23643700  | 0.37579200  |
| N | 3.36971100  | 0.86169700  | 2.24481600  |
| N | 3.12095700  | -0.76828800 | 0.78780100  |
| N | 2.49935100  | 1.21894500  | 1.25583700  |
| C | 4.64444000  | -1.28000200 | 2.66371900  |
| H | 5.65825000  | -1.21462100 | 2.24977600  |
| H | 4.68869300  | -0.98498300 | 3.71290900  |
| C | 1.98935300  | 2.56835400  | 1.23715100  |
| C | 0.96554700  | 2.90659400  | 2.12650100  |
| C | 2.62341500  | 3.48766400  | 0.40060000  |
| C | 0.51298000  | 4.22196100  | 2.09032000  |
| C | 2.12932100  | 4.79411000  | 0.40637300  |
| C | 1.06836900  | 5.17135300  | 1.22723300  |
| H | -0.29182700 | 4.51630100  | 2.75933800  |
| H | 2.59820200  | 5.53345500  | -0.23816400 |
| C | 0.39270000  | 1.89738000  | 3.08284900  |
| H | -0.08152100 | 1.08945600  | 2.51909700  |

|    |             |             |             |
|----|-------------|-------------|-------------|
| H  | 1.17653700  | 1.47514700  | 3.71902400  |
| H  | -0.35418000 | 2.36772300  | 3.72487600  |
| C  | 0.52248100  | 6.57488900  | 1.18682300  |
| H  | -0.35233100 | 6.62715900  | 0.52961700  |
| H  | 0.20516600  | 6.90411200  | 2.17908500  |
| H  | 1.26517800  | 7.27948500  | 0.80674100  |
| C  | 3.80372700  | 3.11034900  | -0.45561700 |
| H  | 4.48834000  | 2.44402100  | 0.07927700  |
| H  | 3.46767600  | 2.59285900  | -1.35786400 |
| H  | 4.35897100  | 4.00378100  | -0.74613300 |
| C  | -0.58487200 | -0.89000700 | -1.74172700 |
| C  | -1.13345900 | 0.41666300  | -2.02970800 |
| C  | 1.45898100  | 0.26127200  | -0.88166500 |
| C  | 0.59969200  | -0.89484100 | -1.04435100 |
| H  | -0.36995600 | 1.12677200  | -2.31917300 |
| H  | 0.82462000  | -1.76559200 | -0.43665900 |
| O  | 1.68111200  | 1.17869000  | -1.66651400 |
| C  | -1.30045600 | -2.17460700 | -1.92410400 |
| C  | -2.69529400 | -2.29176400 | -1.85482700 |
| C  | -0.54485600 | -3.33551500 | -2.14853100 |
| C  | -3.30482600 | -3.53785300 | -1.95691100 |
| H  | -3.31824400 | -1.42409800 | -1.68265600 |
| C  | -1.15673000 | -4.57916100 | -2.26105400 |
| H  | 0.53306200  | -3.25193700 | -2.25267500 |
| C  | -2.54179400 | -4.68621600 | -2.15436600 |
| H  | -4.38479700 | -3.60293800 | -1.87014100 |
| H  | -0.55208900 | -5.46320400 | -2.43717400 |
| H  | -3.02285400 | -5.65614000 | -2.23318200 |
| Cl | -2.42869700 | 0.56473900  | -3.24920300 |
| C  | 4.06277400  | -2.68737400 | 2.47162100  |
| H  | 3.04060000  | -2.70099000 | 2.86260000  |
| H  | 4.63947800  | -3.41535500 | 3.04650400  |
| C  | -3.22923500 | 2.61644800  | -0.85073000 |
| C  | -3.86069200 | 1.44297900  | -0.34809600 |
| C  | -5.25927300 | 1.37895000  | -0.29589400 |
| C  | -6.00994700 | 2.45425400  | -0.74778500 |
| C  | -5.37150000 | 3.59534800  | -1.26036200 |
| C  | -3.99107200 | 3.69547300  | -1.32554100 |
| C  | -1.47234600 | 1.20220600  | -0.35497400 |
| C  | -2.79245400 | 0.54254600  | 0.06761700  |
| H  | -5.74109200 | 0.48370500  | 0.07521800  |
| H  | -7.09285100 | 2.40989600  | -0.71996400 |
| H  | -5.97570300 | 4.42289400  | -1.62131400 |
| H  | -3.50947400 | 4.57916400  | -1.72957000 |
| N  | -1.87788300 | 2.53952000  | -0.77246200 |
| O  | -0.42579500 | 1.06824900  | 0.34478600  |
| N  | -2.70773800 | -0.56879200 | 0.71569000  |
| C  | -0.92794700 | 3.48274600  | -1.29666100 |
| H  | 0.06471700  | 3.15348000  | -0.97209800 |
| H  | -0.95929100 | 3.53740300  | -2.39422800 |
| H  | -1.10914800 | 4.48271100  | -0.88861200 |
| C  | -3.82120500 | -1.35570200 | 0.97171400  |
| O  | -4.79888200 | -1.49316900 | 0.25520500  |
| O  | -3.61622900 | -2.04691700 | 2.10158300  |
| C  | -4.55000900 | -3.08295300 | 2.51746300  |
| C  | -5.91013300 | -2.47368900 | 2.84370800  |
| C  | -4.64526100 | -4.17161600 | 1.45036500  |

|   |             |             |            |
|---|-------------|-------------|------------|
| C | -3.89760400 | -3.63658200 | 3.77983100 |
| H | -5.79498000 | -1.67244900 | 3.57934800 |
| H | -6.38486600 | -2.07319200 | 1.94817800 |
| H | -6.55681800 | -3.24426600 | 3.27313100 |
| H | -3.64197500 | -4.48155300 | 1.14105900 |
| H | -5.16301200 | -5.03911800 | 1.86982500 |
| H | -5.19057500 | -3.82196800 | 0.57469600 |
| H | -4.52101300 | -4.42648600 | 4.20610600 |
| H | -2.91366100 | -4.05228200 | 3.54687100 |
| H | -3.77536500 | -2.84513000 | 4.52381000 |

**TS3<sub>C=O</sub>RS**

Total energy= -2814.49719063

Sum of electronic and zero-point Energies= -2813.656707

Sum of electronic and thermal Energies= -2813.606687

Sum of electronic and thermal Enthalpies= -2813.605743

Sum of electronic and thermal Free Energies= -2813.741513

|   |             |             |             |
|---|-------------|-------------|-------------|
| C | 5.09924700  | -0.42510200 | 1.09553400  |
| C | 6.48753200  | -0.45148000 | 1.03954900  |
| C | 7.20342400  | -1.21639000 | 1.95877600  |
| C | 6.50568400  | -1.94642500 | 2.91737700  |
| C | 5.10870000  | -1.91569500 | 2.96484800  |
| C | 4.39055000  | -1.14938600 | 2.05134400  |
| C | 4.52734400  | 0.44806400  | -0.00008000 |
| C | 5.75853500  | 0.89846900  | -0.85767000 |
| C | 7.01328700  | 0.40316400  | -0.08366500 |
| H | 8.28822900  | -1.24861400 | 1.92352200  |
| H | 7.05218300  | -2.54913900 | 3.63557600  |
| H | 4.58087500  | -2.49010600 | 3.71870400  |
| H | 3.30299800  | -1.12692900 | 2.08729200  |
| H | 5.75781700  | 1.98852000  | -0.90266800 |
| H | 7.68959000  | -0.16273200 | -0.73450200 |
| H | 3.98246300  | 1.30084500  | 0.40495500  |
| H | 7.58798900  | 1.24938300  | 0.30457600  |
| C | 3.96314700  | -1.22749700 | -1.76537500 |
| C | 2.27824000  | -0.63862300 | -0.50109800 |
| N | 2.99378500  | -2.03701400 | -2.08386600 |
| N | 3.55911400  | -0.34490300 | -0.79345400 |
| N | 1.95683200  | -1.67162500 | -1.27673400 |
| C | 5.33426300  | -1.12108700 | -2.33139100 |
| H | 6.02813500  | -1.71759600 | -1.72641500 |
| H | 5.33454800  | -1.53093700 | -3.34228200 |
| C | 0.75305500  | -2.46736500 | -1.27234100 |
| C | -0.14100900 | -2.33310600 | -2.33732800 |
| C | 0.57963200  | -3.38219100 | -0.23111200 |
| C | -1.30105500 | -3.10164200 | -2.28883200 |
| C | -0.59549100 | -4.13370600 | -0.23972900 |
| C | -1.55148700 | -3.99440400 | -1.24528600 |
| H | -2.02938100 | -3.00044600 | -3.08904000 |
| H | -0.76050400 | -4.85251100 | 0.55981700  |
| C | 0.14874000  | -1.41716800 | -3.49400900 |
| H | 0.29962000  | -0.39851700 | -3.13074800 |
| H | 1.04590200  | -1.74132400 | -4.03093100 |
| H | -0.68898200 | -1.41833500 | -4.19390800 |
| C | -2.80350200 | -4.83136800 | -1.22398200 |



|    |             |             |             |
|----|-------------|-------------|-------------|
| H  | -3.26204700 | -4.81318500 | -0.23217100 |
| H  | -3.53816400 | -4.45853600 | -1.93939300 |
| H  | -2.57506200 | -5.87408000 | -1.46891800 |
| C  | 1.60936300  | -3.59913800 | 0.84694400  |
| H  | 2.61862200  | -3.34640600 | 0.50800600  |
| H  | 1.38410800  | -2.97884900 | 1.71709700  |
| H  | 1.61125000  | -4.64757200 | 1.15261300  |
| C  | 0.28238800  | 2.23244500  | 0.93195100  |
| C  | -0.97328100 | 1.57106400  | 1.09644700  |
| C  | 1.36628000  | 0.02405900  | 0.52501400  |
| C  | 1.34318700  | 1.46283900  | 0.48900600  |
| H  | -0.93460100 | 0.55984100  | 1.47706200  |
| H  | 2.13423100  | 1.96275400  | -0.06041800 |
| O  | 0.80179200  | -0.74276400 | 1.29761100  |
| C  | 0.45829400  | 3.70787500  | 0.94602500  |
| C  | -0.52847400 | 4.60229000  | 0.50411400  |
| C  | 1.67580200  | 4.23025600  | 1.40500400  |
| C  | -0.28939400 | 5.97259500  | 0.50638600  |
| H  | -1.47251800 | 4.21488400  | 0.13599400  |
| C  | 1.90819300  | 5.60202000  | 1.41699600  |
| H  | 2.43487000  | 3.54841700  | 1.77701100  |
| C  | 0.92590100  | 6.47887500  | 0.96446800  |
| H  | -1.05880000 | 6.64934700  | 0.14838400  |
| H  | 2.85478900  | 5.98476300  | 1.78499400  |
| H  | 1.10394400  | 7.54943200  | 0.97075400  |
| Cl | -2.30663100 | 2.42086200  | 1.91554100  |
| C  | 5.71773400  | 0.36378300  | -2.29713400 |
| H  | 4.99148000  | 0.92974700  | -2.88920900 |
| H  | 6.69691000  | 0.51058400  | -2.75846600 |
| C  | -3.21150400 | 2.29908200  | -1.46612600 |
| C  | -3.79288800 | 1.14685700  | -0.88924900 |
| C  | -5.17758900 | 0.98449600  | -0.85812500 |
| C  | -5.98700700 | 1.96851800  | -1.41118600 |
| C  | -5.40534300 | 3.10487500  | -1.98898200 |
| C  | -4.02873600 | 3.29096000  | -2.02370700 |
| C  | -1.39679700 | 1.05156200  | -0.73288900 |
| C  | -2.69980200 | 0.30375700  | -0.41001600 |
| H  | -5.61773300 | 0.09179600  | -0.42568900 |
| H  | -7.06539700 | 1.85905200  | -1.39873800 |
| H  | -6.04742300 | 3.86862300  | -2.41822700 |
| H  | -3.60195700 | 4.18854900  | -2.45819200 |
| N  | -1.83887700 | 2.28554500  | -1.38371500 |
| O  | -0.39805900 | 0.44742400  | -1.19908300 |
| N  | -2.66237900 | -0.82700100 | 0.17653000  |
| C  | -0.96520300 | 2.90441400  | -2.36055900 |
| H  | -0.43280700 | 2.12150400  | -2.91540700 |
| H  | -1.56385000 | 3.49883200  | -3.05771900 |
| H  | -0.22837900 | 3.55893800  | -1.87820000 |
| C  | -3.82303700 | -1.56329600 | 0.39233600  |
| O  | -4.40343000 | -2.19808300 | -0.46516400 |
| O  | -4.14130100 | -1.53870600 | 1.69134600  |
| C  | -5.27221800 | -2.30829000 | 2.19796600  |
| C  | -6.57119500 | -1.78284800 | 1.59532400  |
| C  | -5.07129100 | -3.79605300 | 1.92468600  |
| C  | -5.22327100 | -2.02888800 | 3.69536300  |
| H  | -6.65885600 | -0.70671700 | 1.77332000  |
| H  | -6.61183700 | -1.97865000 | 0.52277800  |

|   |             |             |            |
|---|-------------|-------------|------------|
| H | -7.41952300 | -2.27984400 | 2.07430900 |
| H | -4.06826500 | -4.09979500 | 2.24018700 |
| H | -5.80163300 | -4.36880200 | 2.50339300 |
| H | -5.19919600 | -4.02454900 | 0.86655200 |
| H | -6.05112400 | -2.53690800 | 4.19628300 |
| H | -4.28175700 | -2.38913200 | 4.11811500 |
| H | -5.30304900 | -0.95524700 | 3.88322500 |

### TS3<sub>C=O</sub>SR

|                                              |                |  |              |
|----------------------------------------------|----------------|--|--------------|
| Total energy=                                | -2814.51218596 |  |              |
| Sum of electronic and zero-point Energies=   |                |  | -2813.673408 |
| Sum of electronic and thermal Energies=      |                |  | -2813.624332 |
| Sum of electronic and thermal Enthalpies=    |                |  | -2813.623388 |
| Sum of electronic and thermal Free Energies= |                |  | -2813.757908 |

|   |             |             |             |
|---|-------------|-------------|-------------|
| C | -1.78839800 | -3.37669500 | -0.69743300 |
| C | -3.02900600 | -3.78988800 | -0.22269400 |
| C | -3.69074900 | -4.85051200 | -0.83740000 |
| C | -3.08740800 | -5.48270600 | -1.92332800 |
| C | -1.84259200 | -5.05887700 | -2.39605800 |
| C | -1.18220800 | -3.99487000 | -1.78595100 |
| C | -1.26522000 | -2.21476600 | 0.11253100  |
| C | -2.22067500 | -2.10732100 | 1.34468400  |
| C | -3.47057800 | -2.93539100 | 0.93880200  |
| H | -4.65805900 | -5.18488400 | -0.47370200 |
| H | -3.58935000 | -6.31440900 | -2.40758400 |
| H | -1.38952600 | -5.56061400 | -3.24490100 |
| H | -0.22046400 | -3.64385100 | -2.14942400 |
| H | -2.49077300 | -1.05442800 | 1.45498500  |
| H | -3.86396100 | -3.52793600 | 1.77186000  |
| H | -1.26410400 | -1.27704800 | -0.44120500 |
| H | -4.26850500 | -2.25532200 | 0.61926800  |
| C | 0.46358800  | -3.25288400 | 1.58421100  |
| C | 1.26586300  | -1.96132700 | 0.02257000  |
| N | 1.75834900  | -3.27508200 | 1.76027600  |
| N | 0.12832600  | -2.46139200 | 0.51987500  |
| N | 2.24144800  | -2.46790900 | 0.77125200  |
| C | -0.62561200 | -3.77828600 | 2.44732600  |
| H | -1.13976200 | -4.60813300 | 1.94945200  |
| H | -0.20022300 | -4.14297200 | 3.38284500  |
| C | 3.64224300  | -2.16748000 | 0.67387400  |
| C | 4.14307500  | -1.18420200 | 1.53503600  |
| C | 4.40118900  | -2.80027300 | -0.30680800 |
| C | 5.47987300  | -0.83377900 | 1.38139900  |
| C | 5.73913700  | -2.41537700 | -0.41637900 |
| C | 6.28876900  | -1.43727000 | 0.41139700  |
| H | 5.89944800  | -0.06112700 | 2.02119400  |
| H | 6.36022500  | -2.88682000 | -1.17334200 |
| C | 3.23409600  | -0.50537400 | 2.52409800  |
| H | 2.34873500  | -0.09773600 | 2.01766800  |
| H | 2.88175300  | -1.21308100 | 3.28106200  |
| H | 3.75601500  | 0.31009100  | 3.02762300  |
| C | 7.72949300  | -1.02128700 | 0.26982000  |
| H | 8.20847700  | -1.52609400 | -0.57083500 |
| H | 7.80502700  | 0.05856200  | 0.11244200  |
| H | 8.29201500  | -1.25918500 | 1.17711700  |

|    |             |             |             |
|----|-------------|-------------|-------------|
| C  | 3.79184800  | -3.82864700 | -1.22342100 |
| H  | 3.20248800  | -4.55927500 | -0.66242800 |
| H  | 3.12596500  | -3.35867000 | -1.95578500 |
| H  | 4.57042800  | -4.35897400 | -1.77321200 |
| C  | 1.87371200  | 1.45496400  | -1.28801800 |
| C  | 0.49842600  | 1.78843200  | -1.47533900 |
| C  | 1.27825000  | -0.95032300 | -1.10657600 |
| C  | 2.19978800  | 0.14741400  | -0.97917400 |
| H  | -0.11829300 | 1.03202800  | -1.93972300 |
| H  | 3.14037300  | -0.04089400 | -0.47643600 |
| O  | 0.43664400  | -1.14430400 | -1.97947200 |
| C  | 2.96279700  | 2.46174500  | -1.15684600 |
| C  | 2.77333100  | 3.72632600  | -0.58180400 |
| C  | 4.24778900  | 2.11534300  | -1.59887900 |
| C  | 3.84193700  | 4.60716700  | -0.44609700 |
| H  | 1.78951400  | 4.00749400  | -0.22142100 |
| C  | 5.31294700  | 3.00058100  | -1.46976500 |
| H  | 4.40365400  | 1.14541200  | -2.06202000 |
| C  | 5.11367700  | 4.25153200  | -0.89086100 |
| H  | 3.67896000  | 5.57845400  | 0.01061200  |
| H  | 6.29710300  | 2.71324400  | -1.82658500 |
| H  | 5.94150900  | 4.94600800  | -0.78933000 |
| Cl | 0.07467900  | 3.36699200  | -2.17031600 |
| C  | -1.58120700 | -2.58749600 | 2.65947100  |
| H  | -1.00720400 | -1.76867900 | 3.10579500  |
| H  | -2.36511200 | -2.85996100 | 3.37043700  |
| C  | -0.93218300 | 3.59483700  | 1.11736400  |
| C  | -2.05677800 | 3.08840900  | 0.42508300  |
| C  | -3.20749800 | 3.85957500  | 0.26329700  |
| C  | -3.25093400 | 5.12890000  | 0.82536300  |
| C  | -2.14382000 | 5.61519800  | 1.53433200  |
| C  | -0.97887700 | 4.87291400  | 1.68612000  |
| C  | -0.26730500 | 1.50172800  | 0.39945500  |
| C  | -1.72081000 | 1.73709100  | -0.00681700 |
| H  | -4.04865600 | 3.48243100  | -0.30958100 |
| H  | -4.13428600 | 5.74678000  | 0.71118800  |
| H  | -2.19059600 | 6.60861800  | 1.97048000  |
| H  | -0.12928900 | 5.28308500  | 2.22058300  |
| N  | 0.11681000  | 2.70270500  | 1.10652700  |
| O  | 0.13204900  | 0.38058600  | 0.79634600  |
| N  | -2.39956200 | 0.79785900  | -0.54418400 |
| C  | 1.14528800  | 2.61487900  | 2.12068600  |
| H  | 0.90878500  | 1.82387000  | 2.84507300  |
| H  | 2.11349700  | 2.39064100  | 1.65841800  |
| H  | 1.22358500  | 3.57330200  | 2.64007700  |
| C  | -3.74978800 | 0.97724700  | -0.84480700 |
| O  | -4.16856300 | 1.42952400  | -1.88773100 |
| O  | -4.49930700 | 0.49000900  | 0.15429000  |
| C  | -5.95907400 | 0.48117200  | 0.05576600  |
| C  | -6.48852400 | 1.90392200  | -0.09736900 |
| C  | -6.39404100 | -0.42559400 | -1.09033900 |
| C  | -6.38701300 | -0.09723700 | 1.39929400  |
| H  | -6.09321400 | 2.53793600  | 0.70237100  |
| H  | -6.21432300 | 2.32656600  | -1.06440900 |
| H  | -7.57872700 | 1.89008300  | -0.01417600 |
| H  | -5.94969300 | -1.41915400 | -0.97595700 |
| H  | -7.48222500 | -0.53232600 | -1.07172300 |

|   |             |             |             |
|---|-------------|-------------|-------------|
| H | -6.09563500 | -0.01073100 | -2.05315100 |
| H | -7.47770400 | -0.13958300 | 1.45320500  |
| H | -5.99340600 | -1.10894900 | 1.52940200  |
| H | -6.01909000 | 0.52850900  | 2.21656800  |

### TS3c=oS5

|                                              |                |  |              |
|----------------------------------------------|----------------|--|--------------|
| Total energy=                                | -2814.51337086 |  |              |
| Sum of electronic and zero-point Energies=   |                |  | -2813.673000 |
| Sum of electronic and thermal Energies=      |                |  | -2813.623806 |
| Sum of electronic and thermal Enthalpies=    |                |  | -2813.622862 |
| Sum of electronic and thermal Free Energies= |                |  | -2813.755164 |

|   |             |             |             |
|---|-------------|-------------|-------------|
| C | 5.04763700  | -0.72859000 | -0.17494500 |
| C | 6.00775800  | -1.46383200 | 0.51213200  |
| C | 7.34608400  | -1.38302700 | 0.13445300  |
| C | 7.69717800  | -0.55655800 | -0.93097900 |
| C | 6.72584800  | 0.17801200  | -1.61686100 |
| C | 5.38660300  | 0.09508000  | -1.24390300 |
| C | 3.67183000  | -0.96533000 | 0.40557600  |
| C | 3.91762600  | -1.77237900 | 1.72446300  |
| C | 5.38297500  | -2.27930800 | 1.61532100  |
| H | 8.10593300  | -1.94849100 | 0.66590200  |
| H | 8.73749300  | -0.48013400 | -1.23103900 |
| H | 7.01767900  | 0.81417800  | -2.44597100 |
| H | 4.61778600  | 0.65036000  | -1.77428000 |
| H | 3.21872500  | -2.61056100 | 1.74021000  |
| H | 5.92179300  | -2.17085300 | 2.56274300  |
| H | 3.00489300  | -1.49595800 | -0.27159900 |
| H | 5.40439000  | -3.34402200 | 1.36066400  |
| C | 3.32381400  | 1.09596200  | 1.76750200  |
| C | 2.09884700  | 0.99151600  | -0.03145400 |
| N | 2.65503300  | 2.21741200  | 1.74885900  |
| N | 3.01593400  | 0.32534400  | 0.67769100  |
| N | 1.90029100  | 2.13726700  | 0.61625900  |
| C | 4.17531600  | 0.51072100  | 2.83479100  |
| H | 5.23038200  | 0.53341100  | 2.53856100  |
| H | 4.05841700  | 1.09551000  | 3.74776200  |
| C | 1.07214600  | 3.23781100  | 0.20492200  |
| C | -0.14936700 | 3.42007400  | 0.86160100  |
| C | 1.50938800  | 4.03161000  | -0.85564000 |
| C | -0.95266800 | 4.46514000  | 0.41452900  |
| C | 0.66320400  | 5.06256900  | -1.26566700 |
| C | -0.56627500 | 5.28920700  | -0.64727300 |
| H | -1.91089300 | 4.63413100  | 0.89867500  |
| H | 0.97581500  | 5.70138200  | -2.08751700 |
| C | -0.58937000 | 2.47206200  | 1.94266500  |
| H | -0.70653800 | 1.45675200  | 1.53961000  |
| H | 0.14028300  | 2.43392000  | 2.75641500  |
| H | -1.55442000 | 2.77987500  | 2.34841200  |
| C | -1.48298400 | 6.38074000  | -1.13372900 |
| H | -2.05739200 | 6.80964300  | -0.30981600 |
| H | -0.92372300 | 7.18049900  | -1.62344200 |
| H | -2.19741500 | 5.98007000  | -1.86047500 |
| C | 2.82379300  | 3.77305800  | -1.54583500 |
| H | 3.61681100  | 3.54196500  | -0.82872500 |
| H | 2.74566100  | 2.92862600  | -2.24037600 |

|    |             |             |             |
|----|-------------|-------------|-------------|
| H  | 3.12681800  | 4.64749000  | -2.12328100 |
| C  | -0.92967900 | -0.17212800 | -1.81695300 |
| C  | -0.54242200 | -1.56863500 | -1.87185000 |
| C  | 1.43191200  | 0.44765700  | -1.28078400 |
| C  | 0.01120600  | 0.72295900  | -1.38353200 |
| H  | 0.48935100  | -1.70880800 | -2.17278800 |
| H  | -0.33826000 | 1.64994100  | -0.94616600 |
| O  | 2.16442600  | -0.13860500 | -2.06743600 |
| C  | -2.32848700 | 0.31228800  | -1.94739300 |
| C  | -3.44874200 | -0.48811200 | -1.68231500 |
| C  | -2.54339100 | 1.63968000  | -2.34799200 |
| C  | -4.73454000 | 0.02581200  | -1.81001400 |
| H  | -3.32124100 | -1.51603200 | -1.36608600 |
| C  | -3.82903200 | 2.15539400  | -2.46790700 |
| H  | -1.69048700 | 2.26721700  | -2.58940100 |
| C  | -4.93272400 | 1.34847700  | -2.20064600 |
| H  | -5.58615700 | -0.61467800 | -1.60109700 |
| H  | -3.96798600 | 3.18474300  | -2.78339800 |
| H  | -5.93819700 | 1.74543200  | -2.30133600 |
| Cl | -1.50980600 | -2.67191200 | -2.89361500 |
| C  | 3.68035100  | -0.93868200 | 2.99567300  |
| H  | 2.60976200  | -0.91323200 | 3.22255400  |
| H  | 4.18185800  | -1.41607200 | 3.84063700  |
| C  | -1.39126600 | -4.08500700 | -0.07998600 |
| C  | -2.31062800 | -3.13202500 | 0.42724000  |
| C  | -3.64191500 | -3.49602300 | 0.65409900  |
| C  | -4.04788700 | -4.79338300 | 0.37399900  |
| C  | -3.12530100 | -5.72851600 | -0.12193700 |
| C  | -1.79941900 | -5.39669200 | -0.35769500 |
| C  | -0.20496300 | -2.10745600 | -0.06554500 |
| C  | -1.56957800 | -1.88263800 | 0.58209200  |
| H  | -4.34417600 | -2.77004800 | 1.04796400  |
| H  | -5.07771600 | -5.08837600 | 0.54082600  |
| H  | -3.45880000 | -6.74032300 | -0.33343300 |
| H  | -1.10217700 | -6.12403200 | -0.75899400 |
| N  | -0.14327900 | -3.55269000 | -0.23143900 |
| O  | 0.81869600  | -1.45789700 | 0.29691400  |
| N  | -1.81953500 | -0.72774600 | 1.08482200  |
| C  | 0.93958100  | -4.18738900 | -0.93586400 |
| H  | 1.81454200  | -3.54051200 | -0.84064700 |
| H  | 1.17395200  | -5.15476900 | -0.48264100 |
| H  | 0.71384000  | -4.33851000 | -2.00052100 |
| C  | -3.00346200 | -0.46519900 | 1.76492500  |
| O  | -3.52068100 | -1.18248500 | 2.60127500  |
| O  | -3.43036100 | 0.76275000  | 1.44279100  |
| C  | -4.61634500 | 1.32461600  | 2.07403900  |
| C  | -5.84447700 | 0.48446600  | 1.73658400  |
| C  | -4.40544000 | 1.45927800  | 3.57984300  |
| C  | -4.72394600 | 2.69943800  | 1.42511100  |
| H  | -5.93700400 | 0.39057800  | 0.65102000  |
| H  | -5.77704900 | -0.50812300 | 2.18263300  |
| H  | -6.73930800 | 0.98328400  | 2.11966500  |
| H  | -3.46614800 | 1.98341500  | 3.78149700  |
| H  | -5.22368600 | 2.04779300  | 4.00499900  |
| H  | -4.37949200 | 0.48405900  | 4.06540300  |
| H  | -5.62228700 | 3.21087400  | 1.78043800  |
| H  | -3.85241700 | 3.30949700  | 1.67942200  |

|   |             |            |            |
|---|-------------|------------|------------|
| H | -4.77502700 | 2.59785000 | 0.33761800 |
|---|-------------|------------|------------|

**M3C=ORR**

Total energy= -2814.53728986

Sum of electronic and zero-point Energies= -2813.693929

Sum of electronic and thermal Energies= -2813.644827

Sum of electronic and thermal Enthalpies= -2813.643882

Sum of electronic and thermal Free Energies= -2813.776565

|   |             |             |             |
|---|-------------|-------------|-------------|
| C | -5.28276500 | -0.03787200 | -0.31378000 |
| C | -6.57046500 | 0.31595400  | 0.07458700  |
| C | -7.66927700 | -0.32755500 | -0.48971700 |
| C | -7.44985600 | -1.32338100 | -1.43912500 |
| C | -6.15186100 | -1.66642000 | -1.82838700 |
| C | -5.04974400 | -1.02161300 | -1.27109400 |
| C | -4.25117700 | 0.77714000  | 0.44073300  |
| C | -5.06709600 | 1.52058900  | 1.55596500  |
| C | -6.54836500 | 1.41774700  | 1.10121300  |
| H | -8.67912700 | -0.06243500 | -0.19060100 |
| H | -8.29646500 | -1.83778000 | -1.88309800 |
| H | -6.00304600 | -2.43958400 | -2.57528100 |
| H | -4.02878900 | -1.24124000 | -1.57424800 |
| H | -4.75320800 | 2.56552900  | 1.58793600  |
| H | -7.21625600 | 1.21254800  | 1.94443400  |
| H | -3.71955400 | 1.45828400  | -0.22617600 |
| H | -6.88220400 | 2.36071900  | 0.65561100  |
| C | -3.49872900 | -0.89446000 | 2.12682900  |
| C | -2.01550600 | -0.44438400 | 0.57835300  |
| N | -2.50427900 | -1.70086200 | 2.36797400  |
| N | -3.23435000 | -0.11192100 | 1.03157000  |
| N | -1.59080200 | -1.41144700 | 1.38899400  |
| C | -4.72564600 | -0.61688500 | 2.91906500  |
| H | -5.60062400 | -1.06985100 | 2.43874800  |
| H | -4.61670200 | -1.04902400 | 3.91438800  |
| C | -0.37025100 | -2.17395100 | 1.29995600  |
| C | 0.74979500  | -1.70861900 | 1.97727200  |
| C | -0.35438800 | -3.25899900 | 0.42322100  |
| C | 1.94552100  | -2.39907700 | 1.77326300  |
| C | 0.85834700  | -3.91841000 | 0.25416900  |
| C | 2.01574000  | -3.50072000 | 0.92106300  |
| H | 2.84676600  | -2.03626800 | 2.26119500  |
| H | 0.91125500  | -4.76070200 | -0.43220700 |
| C | 0.67982500  | -0.45371100 | 2.80059300  |
| H | 0.62596000  | 0.41180300  | 2.12815100  |
| H | -0.20059900 | -0.44814900 | 3.44932600  |
| H | 1.57775500  | -0.34193300 | 3.40864600  |
| C | 3.31330700  | -4.23496100 | 0.70872500  |
| H | 3.47520600  | -4.43337900 | -0.35445300 |
| H | 4.16164100  | -3.65224300 | 1.07549500  |
| H | 3.30618200  | -5.19606700 | 1.23352100  |
| C | -1.58285800 | -3.60488700 | -0.37338400 |
| H | -2.45560900 | -3.74500700 | 0.27241500  |
| H | -1.80997900 | -2.78514300 | -1.06800500 |
| H | -1.42779700 | -4.51737700 | -0.95199700 |
| C | -0.04404900 | 2.19250400  | -1.14709300 |
| C | 0.52586100  | 1.25682400  | -2.20063100 |

|    |             |             |             |
|----|-------------|-------------|-------------|
| C  | -1.39120600 | 0.18542000  | -0.69544900 |
| C  | -1.00696000 | 1.63767400  | -0.40550800 |
| H  | -0.25718300 | 1.06402500  | -2.93687800 |
| H  | -1.50913700 | 2.19972500  | 0.37979600  |
| O  | -2.16306600 | -0.00033900 | -1.72189600 |
| C  | 0.36104200  | 3.61014600  | -0.98022000 |
| C  | 1.68760000  | 3.97465500  | -0.71184200 |
| C  | -0.61783500 | 4.60860800  | -1.03105700 |
| C  | 2.01725800  | 5.30935600  | -0.49976500 |
| H  | 2.45461000  | 3.20908800  | -0.64981800 |
| C  | -0.28399000 | 5.94409000  | -0.82066600 |
| H  | -1.64423100 | 4.32915800  | -1.25051500 |
| C  | 1.03584100  | 6.29812900  | -0.55559200 |
| H  | 3.04697500  | 5.57730800  | -0.28456700 |
| H  | -1.05493400 | 6.70668400  | -0.87096900 |
| H  | 1.29952400  | 7.33839900  | -0.39296800 |
| Cl | 1.91836100  | 1.90132800  | -3.13210400 |
| C  | -4.85317100 | 0.91678600  | 2.95757900  |
| H  | -3.94034900 | 1.32433800  | 3.40391000  |
| H  | -5.68441300 | 1.20930300  | 3.60308100  |
| C  | 2.41911700  | -1.65283600 | -2.42863200 |
| C  | 3.14034400  | -1.00953200 | -1.40191600 |
| C  | 4.44166400  | -1.39895700 | -1.08656300 |
| C  | 5.02362700  | -2.43732500 | -1.80278000 |
| C  | 4.29152200  | -3.09062800 | -2.80473100 |
| C  | 2.98988300  | -2.72289200 | -3.12806000 |
| C  | 0.89921500  | -0.11272600 | -1.57655800 |
| C  | 2.23872000  | -0.03446100 | -0.80320700 |
| H  | 4.99622800  | -0.89647200 | -0.30066300 |
| H  | 6.03743600  | -2.75085200 | -1.58140400 |
| H  | 4.75409300  | -3.91019100 | -3.34686100 |
| H  | 2.43963900  | -3.23720200 | -3.90814500 |
| N  | 1.17672100  | -1.10333400 | -2.61412500 |
| O  | -0.10392200 | -0.55731500 | -0.72543700 |
| N  | 2.36185500  | 0.77784100  | 0.17009400  |
| C  | 0.08928800  | -1.84149000 | -3.22565300 |
| H  | -0.84527000 | -1.31575600 | -3.00741700 |
| H  | 0.23058000  | -1.91258900 | -4.30824300 |
| H  | 0.02236200  | -2.85499100 | -2.80629100 |
| C  | 3.60701300  | 0.99015300  | 0.76343000  |
| O  | 4.49990500  | 1.61575100  | 0.23004600  |
| O  | 3.62596000  | 0.50980600  | 2.00854100  |
| C  | 4.79208500  | 0.72301300  | 2.86740300  |
| C  | 6.00405000  | 0.01106800  | 2.27653200  |
| C  | 5.03086300  | 2.21599800  | 3.07055100  |
| C  | 4.37437300  | 0.07115400  | 4.17968700  |
| H  | 5.76816100  | -1.04334400 | 2.09755800  |
| H  | 6.31722600  | 0.47709800  | 1.34120900  |
| H  | 6.83330800  | 0.05900400  | 2.98748300  |
| H  | 4.11008200  | 2.69574200  | 3.41463400  |
| H  | 5.79696600  | 2.35274400  | 3.83866700  |
| H  | 5.36211800  | 2.69495300  | 2.14982900  |
| H  | 5.18537000  | 0.15479300  | 4.90744600  |
| H  | 3.48886300  | 0.56609100  | 4.58778800  |
| H  | 4.14975700  | -0.98905100 | 4.03104200  |

M3C=oS

Total energy= -2814.51812370  
Sum of electronic and zero-point Energies= -2813.674575  
Sum of electronic and thermal Energies= -2813.625245  
Sum of electronic and thermal Enthalpies= -2813.624301  
Sum of electronic and thermal Free Energies= -2813.757269

|   |             |             |             |
|---|-------------|-------------|-------------|
| C | -4.39877000 | -1.63678800 | -1.11344300 |
| C | -5.74739700 | -1.87542100 | -1.35285900 |
| C | -6.14346200 | -3.05736500 | -1.97704200 |
| C | -5.16459900 | -3.97889300 | -2.34550300 |
| C | -3.81172400 | -3.72519600 | -2.10427600 |
| C | -3.41238600 | -2.54203200 | -1.48825800 |
| C | -4.20864100 | -0.30596300 | -0.40937900 |
| C | -5.65373600 | 0.11861900  | 0.02396800  |
| C | -6.59480800 | -0.72609400 | -0.87604400 |
| H | -7.19379300 | -3.25756100 | -2.16420300 |
| H | -5.45946700 | -4.90767100 | -2.82427500 |
| H | -3.06725900 | -4.45205000 | -2.40835900 |
| H | -2.36623100 | -2.30131400 | -1.31415900 |
| H | -5.79451100 | 1.18321800  | -0.17309300 |
| H | -7.48847900 | -1.05315500 | -0.33459000 |
| H | -3.72450500 | 0.42400700  | -1.06126000 |
| H | -6.94429100 | -0.13194000 | -1.73110200 |
| C | -3.75817800 | -1.14881000 | 1.88355500  |
| C | -2.01640800 | -0.26259700 | 0.89559700  |
| N | -2.76600100 | -1.37051100 | 2.69400700  |
| N | -3.33601000 | -0.47596000 | 0.76581500  |
| N | -1.67983100 | -0.82240400 | 2.05560100  |
| C | -5.21613100 | -1.38748200 | 2.06002700  |
| H | -5.52389400 | -2.27339100 | 1.49446300  |
| H | -5.42946400 | -1.56198100 | 3.11282500  |
| C | -0.37209700 | -0.97163200 | 2.65345600  |
| C | -0.03654700 | -0.13811900 | 3.71290400  |
| C | 0.50535800  | -1.90307500 | 2.08865900  |
| C | 1.25227600  | -0.24982900 | 4.23108700  |
| C | 1.78396600  | -1.96900200 | 2.63511700  |
| C | 2.17519800  | -1.15773700 | 3.70344400  |
| H | 1.54749600  | 0.39304500  | 5.05688200  |
| H | 2.50407500  | -2.65295600 | 2.18634300  |
| C | -1.02170400 | 0.87655800  | 4.24023100  |
| H | -1.35147100 | 1.54357800  | 3.43833200  |
| H | -1.91035600 | 0.38976100  | 4.65247800  |
| H | -0.56309600 | 1.48475400  | 5.02231900  |
| C | 3.55422200  | -1.27827500 | 4.29697100  |
| H | 4.25685300  | -1.68347100 | 3.56813600  |
| H | 3.92546800  | -0.30391700 | 4.62408400  |
| H | 3.54006000  | -1.94353800 | 5.16838300  |
| C | 0.10864800  | -2.73076800 | 0.90064400  |
| H | -0.85354800 | -3.22834100 | 1.06967800  |
| H | 0.01021100  | -2.09343300 | 0.01124100  |
| H | 0.86938900  | -3.48681800 | 0.69505900  |
| C | -0.56224900 | 2.53460500  | -1.15160800 |
| C | 0.72386600  | 1.76751500  | -1.43175200 |
| C | -1.15311900 | 0.34018500  | -0.25024200 |
| C | -1.49826700 | 1.80187300  | -0.53639400 |
| H | 0.49277800  | 0.95666400  | -2.12596000 |



|    |             |             |             |
|----|-------------|-------------|-------------|
| H  | -2.45327100 | 2.23512700  | -0.24009000 |
| O  | -1.19027300 | -0.44935300 | -1.26426100 |
| C  | -0.77939900 | 3.96304700  | -1.48899300 |
| C  | 0.10779300  | 4.95968700  | -1.06695900 |
| C  | -1.93917100 | 4.33376200  | -2.17832700 |
| C  | -0.16523700 | 6.29783300  | -1.32793000 |
| H  | 1.00717900  | 4.68056600  | -0.52494500 |
| C  | -2.20936200 | 5.67334300  | -2.44025100 |
| H  | -2.62001900 | 3.56223500  | -2.52198600 |
| C  | -1.32279500 | 6.66080700  | -2.01594300 |
| H  | 0.52752300  | 7.06311200  | -0.98900800 |
| H  | -3.10895800 | 5.94800200  | -2.98358400 |
| H  | -1.52991200 | 7.70547900  | -2.22183400 |
| Cl | 2.05338000  | 2.70121100  | -2.18776200 |
| C  | -5.91595600 | -0.12591400 | 1.52583600  |
| H  | -5.55829700 | 0.73246200  | 2.10740700  |
| H  | -6.99367200 | -0.19457500 | 1.69196000  |
| C  | 3.07836900  | 1.46248800  | 1.20018800  |
| C  | 3.43510200  | 0.31679700  | 0.46903100  |
| C  | 4.64471500  | -0.33721500 | 0.70278000  |
| C  | 5.49922000  | 0.16168600  | 1.67981600  |
| C  | 5.12418200  | 1.28725100  | 2.42641000  |
| C  | 3.91935700  | 1.94799500  | 2.21042200  |
| C  | 1.21637100  | 1.07800000  | -0.13914100 |
| C  | 2.31946000  | 0.03079200  | -0.43235300 |
| H  | 4.90727100  | -1.23316700 | 0.14937100  |
| H  | 6.44314100  | -0.33187500 | 1.88095700  |
| H  | 5.79355700  | 1.65455300  | 3.19793000  |
| H  | 3.64822000  | 2.81749300  | 2.79582500  |
| N  | 1.86703600  | 1.98522200  | 0.80757100  |
| O  | 0.15367000  | 0.43431000  | 0.48821500  |
| N  | 2.10876900  | -0.87794400 | -1.29026000 |
| C  | 1.09047000  | 2.77371600  | 1.74719300  |
| H  | 0.08670700  | 2.90958400  | 1.35207800  |
| H  | 1.02587900  | 2.27541800  | 2.72043100  |
| H  | 1.54694300  | 3.75959600  | 1.88126400  |
| C  | 3.01490100  | -1.92957400 | -1.44958500 |
| O  | 3.09719500  | -2.86761300 | -0.68482800 |
| O  | 3.68769800  | -1.78462200 | -2.59191300 |
| C  | 4.60714200  | -2.82288500 | -3.05037100 |
| C  | 5.74909900  | -2.99609400 | -2.05207200 |
| C  | 3.84375800  | -4.12348500 | -3.28822800 |
| C  | 5.12887700  | -2.25563700 | -4.36690300 |
| H  | 6.23137600  | -2.03031800 | -1.86677900 |
| H  | 5.38626700  | -3.40960000 | -1.10783800 |
| H  | 6.49510200  | -3.67276400 | -2.47628300 |
| H  | 2.99565100  | -3.93601500 | -3.95228300 |
| H  | 4.50626600  | -4.84666600 | -3.77216900 |
| H  | 3.48044500  | -4.54381000 | -2.35168200 |
| H  | 5.84096900  | -2.95291100 | -4.81280800 |
| H  | 4.30301200  | -2.09304400 | -5.06210100 |
| H  | 5.62988700  | -1.29762800 | -4.19282000 |

### M3<sub>C=O</sub>SR

Total energy= -2814.51812370

Sum of electronic and zero-point Energies= -2813.682266

Sum of electronic and thermal Energies= -2813.632823

Sum of electronic and thermal Enthalpies= -2813.631879  
 Sum of electronic and thermal Free Energies= -2813.766002

|   |             |             |             |
|---|-------------|-------------|-------------|
| C | -2.21021300 | -3.11713200 | -0.95124200 |
| C | -3.46746400 | -3.65911400 | -0.70745100 |
| C | -3.96720300 | -4.66592900 | -1.53084100 |
| C | -3.18555300 | -5.11656200 | -2.59215300 |
| C | -1.92415300 | -4.56489200 | -2.83263300 |
| C | -1.42411900 | -3.55549100 | -2.01360400 |
| C | -1.86583800 | -2.05921500 | 0.07689200  |
| C | -2.99674000 | -2.16910800 | 1.15863400  |
| C | -4.11939400 | -3.00393600 | 0.48176500  |
| H | -4.94692400 | -5.09695000 | -1.34561800 |
| H | -3.55959000 | -5.90396100 | -3.23911800 |
| H | -1.33120800 | -4.92392200 | -3.66785700 |
| H | -0.45962400 | -3.09014900 | -2.19294500 |
| H | -3.35506700 | -1.16106200 | 1.37981600  |
| H | -4.55710100 | -3.73348700 | 1.17171500  |
| H | -1.79262900 | -1.06120200 | -0.36089000 |
| H | -4.93794800 | -2.35572200 | 0.14861900  |
| C | -0.34348500 | -3.34280900 | 1.58592600  |
| C | 0.66431700  | -1.84640200 | 0.35086100  |
| N | 0.92365300  | -3.47952900 | 1.86406200  |
| N | -0.53872800 | -2.35444800 | 0.65746800  |
| N | 1.53499800  | -2.54133500 | 1.07508000  |
| C | -1.53164600 | -3.96618300 | 2.22594500  |
| H | -1.97072400 | -4.71868300 | 1.56075800  |
| H | -1.22542600 | -4.45873700 | 3.14961200  |
| C | 2.95977900  | -2.37652900 | 1.10165000  |
| C | 3.51334000  | -1.60813900 | 2.12629200  |
| C | 3.70434800  | -2.93073400 | 0.05980400  |
| C | 4.88785500  | -1.38264500 | 2.07618400  |
| C | 5.07507000  | -2.67991200 | 0.05592200  |
| C | 5.67785500  | -1.90064200 | 1.04709700  |
| H | 5.35061700  | -0.77908100 | 2.85306200  |
| H | 5.68236700  | -3.08737400 | -0.74812700 |
| C | 2.64420100  | -1.04548400 | 3.21852600  |
| H | 1.74605800  | -0.57847400 | 2.80127600  |
| H | 2.31515100  | -1.83771100 | 3.89819800  |
| H | 3.18819300  | -0.29683700 | 3.79669000  |
| C | 7.14831500  | -1.58279200 | 0.97717300  |
| H | 7.70267700  | -2.38404300 | 0.47973700  |
| H | 7.30676700  | -0.65976400 | 0.40379900  |
| H | 7.57023900  | -1.43046600 | 1.97554100  |
| C | 3.02401300  | -3.68608700 | -1.05161600 |
| H | 2.36042100  | -4.46167500 | -0.65862300 |
| H | 2.41122200  | -3.00714400 | -1.65890600 |
| H | 3.76037800  | -4.15349800 | -1.70648300 |
| C | 2.24877000  | 1.16599600  | -1.30805900 |
| C | 0.88898200  | 1.81777200  | -1.45894100 |
| C | 0.80236400  | -0.69392300 | -0.67028500 |
| C | 2.18746000  | -0.10268100 | -0.88093000 |
| H | 0.31592500  | 1.25057000  | -2.19292600 |
| H | 3.09669100  | -0.66368100 | -0.69690000 |
| O | 0.12994900  | -0.95591400 | -1.72582200 |
| C | 3.55206100  | 1.83994800  | -1.51249100 |
| C | 3.82575800  | 3.09031300  | -0.94295200 |

|    |             |             |             |
|----|-------------|-------------|-------------|
| C  | 4.57381800  | 1.17659700  | -2.20359300 |
| C  | 5.08945700  | 3.66005900  | -1.06461500 |
| H  | 3.04665800  | 3.61040600  | -0.39463700 |
| C  | 5.83730200  | 1.74761800  | -2.32364600 |
| H  | 4.36511700  | 0.21172900  | -2.65716200 |
| C  | 6.09901200  | 2.99231900  | -1.75509200 |
| H  | 5.28667100  | 4.62694900  | -0.61254000 |
| H  | 6.61645900  | 1.22277400  | -2.86740800 |
| H  | 7.08264700  | 3.44022300  | -1.85208800 |
| Cl | 0.87425200  | 3.51419500  | -2.03692100 |
| C  | -2.51923400 | -2.81156600 | 2.47382400  |
| H  | -2.02073900 | -2.06196000 | 3.09722100  |
| H  | -3.38475100 | -3.17174600 | 3.03505700  |
| C  | -0.32444700 | 3.45983700  | 1.33093100  |
| C  | -1.52662300 | 3.30688400  | 0.61278800  |
| C  | -2.61889600 | 4.13837900  | 0.85179200  |
| C  | -2.51744100 | 5.10938500  | 1.84153700  |
| C  | -1.33383700 | 5.22821100  | 2.58216100  |
| C  | -0.22845100 | 4.41759600  | 2.34617600  |
| C  | 0.11615400  | 1.68221400  | -0.11687100 |
| C  | -1.34339500 | 2.16209800  | -0.27165800 |
| H  | -3.52618200 | 4.04215800  | 0.26396300  |
| H  | -3.35016000 | 5.77401500  | 2.04103200  |
| H  | -1.27105800 | 5.98215600  | 3.36118300  |
| H  | 0.68183000  | 4.53332000  | 2.92389500  |
| N  | 0.64976400  | 2.58605900  | 0.91140600  |
| O  | 0.13516000  | 0.36323300  | 0.30720700  |
| N  | -2.14106100 | 1.50855200  | -1.01593000 |
| C  | 1.73904400  | 2.20895100  | 1.79089400  |
| H  | 1.36787600  | 1.89610400  | 2.77580400  |
| H  | 2.28724000  | 1.38103900  | 1.34158400  |
| H  | 2.43058000  | 3.04607100  | 1.92874400  |
| C  | -3.49183900 | 1.86493200  | -1.08201200 |
| O  | -3.97316700 | 2.54627600  | -1.95858200 |
| O  | -4.16379200 | 1.27033000  | -0.08723300 |
| C  | -5.62199900 | 1.37031100  | -0.00824600 |
| C  | -6.04961100 | 2.82239400  | 0.18085600  |
| C  | -6.24948000 | 0.73579800  | -1.24456100 |
| C  | -5.95216800 | 0.56294100  | 1.24104700  |
| H  | -5.56963700 | 3.24426500  | 1.06919400  |
| H  | -5.80011200 | 3.42715900  | -0.69138000 |
| H  | -7.13201500 | 2.85664600  | 0.33260600  |
| H  | -5.85737500 | -0.27602900 | -1.38424500 |
| H  | -7.33199300 | 0.67011600  | -1.10494900 |
| H  | -6.04299600 | 1.32417100  | -2.13862500 |
| H  | -7.02834300 | 0.59429300  | 1.42821300  |
| H  | -5.65248300 | -0.48099200 | 1.11635300  |
| H  | -5.43184800 | 0.97650400  | 2.10913100  |

### M3<sub>C=O</sub>SS

Total energy= -2814.53000132

Sum of electronic and zero-point Energies= -2813.687347

Sum of electronic and thermal Energies= -2813.637598

Sum of electronic and thermal Enthalpies= -2813.636654

Sum of electronic and thermal Free Energies= -2813.773379

|   |             |             |             |
|---|-------------|-------------|-------------|
| C | 1.64991500  | -3.49148800 | 0.26275600  |
| C | 1.79387900  | -4.77199100 | 0.78532400  |
| C | 2.08798500  | -5.84004400 | -0.06066800 |
| C | 2.24539800  | -5.59695500 | -1.42261300 |
| C | 2.12248800  | -4.30178300 | -1.93546200 |
| C | 1.82304800  | -3.23181800 | -1.09577900 |
| C | 1.32069900  | -2.49352600 | 1.34990200  |
| C | 1.38097600  | -3.30468400 | 2.69047000  |
| C | 1.61805000  | -4.78605500 | 2.28102600  |
| H | 2.20195100  | -6.84403000 | 0.33770200  |
| H | 2.47798700  | -6.41947300 | -2.09179600 |
| H | 2.26681700  | -4.12782500 | -2.99741200 |
| H | 1.74505200  | -2.21679600 | -1.48122100 |
| H | 0.40313300  | -3.21314000 | 3.16611400  |
| H | 2.50197900  | -5.20373100 | 2.77807500  |
| H | 0.34401500  | -2.04173700 | 1.20514000  |
| H | 0.77009900  | -5.41036700 | 2.57786600  |
| C | 3.48586200  | -1.41385600 | 1.98999700  |
| C | 2.29924100  | -0.25030000 | 0.55831100  |
| N | 4.21486600  | -0.37033900 | 1.71951000  |
| N | 2.29159500  | -1.37142000 | 1.30847600  |
| N | 3.46845300  | 0.33487200  | 0.82240100  |
| C | 3.75887000  | -2.50617900 | 2.95944000  |
| H | 4.11226200  | -3.39615500 | 2.42420000  |
| H | 4.54900900  | -2.18447400 | 3.63919000  |
| C | 4.00687800  | 1.54832400  | 0.26358300  |
| C | 3.83254000  | 2.74713100  | 0.95659900  |
| C | 4.74678100  | 1.44608700  | -0.91914200 |
| C | 4.37504900  | 3.89899200  | 0.38516000  |
| C | 5.27600700  | 2.62336800  | -1.44103300 |
| C | 5.08655900  | 3.85736200  | -0.81330700 |
| H | 4.24380500  | 4.84949300  | 0.89706300  |
| H | 5.85324900  | 2.57598000  | -2.36056400 |
| C | 3.13232800  | 2.82334800  | 2.28935300  |
| H | 2.53607300  | 1.93437700  | 2.50523900  |
| H | 3.86718000  | 2.92904400  | 3.09302800  |
| H | 2.47349600  | 3.69525300  | 2.32536100  |
| C | 5.63091700  | 5.12322900  | -1.42146000 |
| H | 4.83328400  | 5.67273300  | -1.93771100 |
| H | 6.04312000  | 5.78573700  | -0.65337500 |
| H | 6.41349800  | 4.90663700  | -2.15509300 |
| C | 4.96915800  | 0.11192800  | -1.57512400 |
| H | 5.43185000  | -0.59147700 | -0.87500900 |
| H | 4.00282200  | -0.29551600 | -1.88933000 |
| H | 5.62385500  | 0.21583600  | -2.44199300 |
| C | -0.38546100 | 2.04105600  | -0.67964400 |
| C | -0.92003500 | 1.06813600  | -1.71246600 |
| C | 1.32922700  | 0.29116400  | -0.54453300 |
| C | 0.76132800  | 1.64460500  | -0.12128600 |
| H | -0.22524100 | 1.06954000  | -2.55312700 |
| H | 1.25925300  | 2.25960700  | 0.62056800  |
| O | 1.88421100  | 0.23704700  | -1.71080800 |
| C | -1.00031500 | 3.34766200  | -0.34105900 |
| C | -2.31921000 | 3.44853100  | 0.12165500  |
| C | -0.21402300 | 4.50413500  | -0.40665600 |
| C | -2.83189900 | 4.68401800  | 0.50498900  |
| H | -2.93041800 | 2.55475800  | 0.20524100  |

|    |             |             |             |
|----|-------------|-------------|-------------|
| C  | -0.73211900 | 5.73870100  | -0.02431000 |
| H  | 0.80793300  | 4.42571800  | -0.76719200 |
| C  | -2.04435900 | 5.83223000  | 0.43075800  |
| H  | -3.85161000 | 4.75134500  | 0.87244800  |
| H  | -0.11077800 | 6.62674100  | -0.08464800 |
| H  | -2.45147600 | 6.79312000  | 0.72927500  |
| Cl | -2.51752600 | 1.48235900  | -2.42546800 |
| C  | 2.43775300  | -2.79830600 | 3.67976500  |
| H  | 2.09262300  | -1.88260200 | 4.17068200  |
| H  | 2.58838100  | -3.54826100 | 4.46012700  |
| C  | -2.31172000 | -2.01518400 | -2.10682600 |
| C  | -3.01379000 | -1.63633300 | -0.94193800 |
| C  | -4.22562900 | -2.23673200 | -0.60524900 |
| C  | -4.75564300 | -3.19931000 | -1.45643600 |
| C  | -4.06795200 | -3.54769800 | -2.62818500 |
| C  | -2.85076700 | -2.97318400 | -2.97434200 |
| C  | -0.95149400 | -0.38557500 | -1.15221800 |
| C  | -2.21198700 | -0.61244800 | -0.28771600 |
| H  | -4.74272500 | -1.96398500 | 0.30972600  |
| H  | -5.69854100 | -3.67834400 | -1.21975300 |
| H  | -4.49760600 | -4.29478400 | -3.28894900 |
| H  | -2.33496000 | -3.25910700 | -3.88396400 |
| N  | -1.12523400 | -1.35195300 | -2.22526200 |
| O  | 0.17540400  | -0.64944500 | -0.37362700 |
| N  | -2.37283100 | 0.07108000  | 0.77395800  |
| C  | -0.24315100 | -1.45066300 | -3.36476600 |
| H  | 0.68660600  | -0.93061000 | -3.11461800 |
| H  | -0.01300300 | -2.50243100 | -3.56739400 |
| H  | -0.68879600 | -1.00738500 | -4.26507600 |
| C  | -3.55321900 | -0.03850800 | 1.51357800  |
| O  | -3.66781500 | -0.69579900 | 2.52386900  |
| O  | -4.48308000 | 0.76305100  | 0.98226100  |
| C  | -5.74714100 | 1.01893000  | 1.67268000  |
| C  | -6.55934600 | -0.26768400 | 1.77082200  |
| C  | -5.47161300 | 1.64263900  | 3.03632600  |
| C  | -6.43276900 | 2.01862000  | 0.75033400  |
| H  | -6.70439400 | -0.69644300 | 0.77461700  |
| H  | -6.06423700 | -0.99751600 | 2.41277300  |
| H  | -7.54362400 | -0.04048600 | 2.18971000  |
| H  | -4.81611000 | 2.51127000  | 2.92109700  |
| H  | -6.41539500 | 1.97900400  | 3.47418800  |
| H  | -5.00370100 | 0.92682200  | 3.71247200  |
| H  | -7.41291700 | 2.28480700  | 1.15385500  |
| H  | -5.83143600 | 2.92742800  | 0.65970000  |
| H  | -6.56591200 | 1.58746900  | -0.24507100 |

### TS2<sup>D</sup><sub>C=O</sub>RR

Total energy= -1798.40407055

Sum of electronic and zero-point Energies= -1797.976704

Sum of electronic and thermal Energies= -1797.948050

Sum of electronic and thermal Enthalpies= -1797.947106

Sum of electronic and thermal Free Energies= -1798.038592

|   |             |            |             |
|---|-------------|------------|-------------|
| C | -1.63188100 | 2.29917600 | -0.82902600 |
| C | -1.70278300 | 1.72870700 | 0.45232400  |
| C | -2.33712000 | 2.39307300 | 1.49068700  |

|    |             |             |             |
|----|-------------|-------------|-------------|
| C  | -2.89145900 | 3.64850800  | 1.23261500  |
| C  | -2.80822400 | 4.20968800  | -0.04267900 |
| C  | -2.17934300 | 3.54274000  | -1.09919300 |
| C  | -0.57898700 | 0.27962600  | -1.06883200 |
| C  | -1.03352500 | 0.42944000  | 0.37276200  |
| H  | -2.39524600 | 1.93947100  | 2.47604000  |
| H  | -3.39229300 | 4.19061500  | 2.02691300  |
| H  | -3.24439800 | 5.18667500  | -0.22351700 |
| H  | -2.12292100 | 3.98396600  | -2.08837400 |
| N  | -0.96760100 | 1.43144500  | -1.70669700 |
| O  | 0.04033800  | -0.64934200 | -1.55698400 |
| N  | -1.10213500 | -0.54529700 | 1.24955200  |
| C  | -0.64175100 | 1.74037200  | -3.08099800 |
| H  | 0.00950900  | 2.61815800  | -3.12997900 |
| H  | -1.55097500 | 1.93005700  | -3.65739100 |
| H  | -0.12246600 | 0.87649900  | -3.49602900 |
| C  | -1.15729900 | -1.89384400 | 0.86877800  |
| O  | -0.61109500 | -2.78511300 | 1.48641900  |
| O  | -2.00513900 | -2.05050000 | -0.14613300 |
| C  | -2.17354300 | -3.35634800 | -0.78434700 |
| C  | -2.87975100 | -4.30607000 | 0.17581300  |
| C  | -0.82630200 | -3.89273000 | -1.25654700 |
| C  | -3.06257600 | -3.02246700 | -1.97575700 |
| H  | -3.81566000 | -3.86143900 | 0.52585100  |
| H  | -2.24711500 | -4.53336800 | 1.03408000  |
| H  | -3.11518900 | -5.23722800 | -0.34736900 |
| H  | -0.30472800 | -3.11955500 | -1.82591500 |
| H  | -0.99762900 | -4.75876000 | -1.90220400 |
| H  | -0.20363000 | -4.19819000 | -0.41569200 |
| H  | -3.28454800 | -3.93118300 | -2.54048000 |
| H  | -2.55540000 | -2.31143000 | -2.63352300 |
| H  | -4.00344200 | -2.58087200 | -1.63676400 |
| C  | 1.80171000  | 0.26613700  | 1.11043600  |
| C  | 1.06141600  | 1.43041000  | 0.98739900  |
| C  | 0.21959100  | -0.55983800 | 2.79663700  |
| C  | 1.37987800  | -0.68732000 | 2.05085000  |
| H  | 0.42861100  | 1.76510400  | 1.79831000  |
| H  | 1.80444800  | -1.68537400 | 2.07276500  |
| O  | -0.38783600 | -0.48154300 | 3.78278900  |
| C  | 3.00086800  | -0.06450900 | 0.29517500  |
| C  | 4.12707400  | -0.58422000 | 0.94429400  |
| C  | 3.03556400  | 0.11506600  | -1.09187100 |
| C  | 5.27021600  | -0.91260700 | 0.22252100  |
| H  | 4.11155100  | -0.71308300 | 2.02257500  |
| C  | 4.17871700  | -0.22065600 | -1.81033100 |
| H  | 2.15821900  | 0.48144900  | -1.61136400 |
| C  | 5.29858800  | -0.73091900 | -1.15777100 |
| H  | 6.13825300  | -1.30742200 | 0.74017500  |
| H  | 4.19043300  | -0.08771100 | -2.88721400 |
| H  | 6.18848400  | -0.98778100 | -1.72309100 |
| Cl | 1.51233300  | 2.75069800  | -0.04259700 |

### TS2<sup>D</sup><sub>C=O</sub>RS

Total energy= -1798.40323101

Sum of electronic and zero-point Energies= -1797.975724

Sum of electronic and thermal Energies= -1797.948135

Sum of electronic and thermal Enthalpies= -1797.947191

Sum of electronic and thermal Free Energies= -1798.034435

|    |             |             |             |
|----|-------------|-------------|-------------|
| C  | -0.21930200 | 2.24064800  | 0.22212400  |
| C  | -0.35560600 | 1.00237200  | 0.86580800  |
| C  | -1.13591500 | 0.87481400  | 2.00078600  |
| C  | -1.83815900 | 1.99670900  | 2.45253700  |
| C  | -1.73678100 | 3.21129900  | 1.77537600  |
| C  | -0.91500000 | 3.35991700  | 0.65130800  |
| C  | 1.16908300  | 0.85658800  | -0.96640900 |
| C  | 0.49251500  | 0.03422100  | 0.14287600  |
| H  | -1.20877300 | -0.08278500 | 2.50801200  |
| H  | -2.47121900 | 1.92194700  | 3.32982400  |
| H  | -2.29442200 | 4.07061900  | 2.13360900  |
| H  | -0.81789400 | 4.31662900  | 0.14938000  |
| N  | 0.70319900  | 2.13803500  | -0.82944200 |
| O  | 1.89990700  | 0.44275900  | -1.84567800 |
| N  | 1.02821700  | -1.03538800 | 0.72983800  |
| C  | 0.98959500  | 3.19415400  | -1.77449100 |
| H  | 1.71700000  | 2.80615600  | -2.48690900 |
| H  | 1.40607200  | 4.06475400  | -1.26139500 |
| H  | 0.07839300  | 3.48552600  | -2.30595400 |
| C  | 2.38447000  | -1.25990900 | 0.70789400  |
| O  | 2.90335600  | -2.35281000 | 0.84522200  |
| O  | 3.07648700  | -0.09635200 | 0.66801600  |
| C  | 4.50867200  | -0.08649400 | 0.42236000  |
| C  | 4.84734700  | -0.88549400 | -0.83337600 |
| C  | 5.24852200  | -0.59964900 | 1.65298100  |
| C  | 4.78980800  | 1.39448600  | 0.19104900  |
| H  | 4.19890700  | -0.56282400 | -1.65228700 |
| H  | 4.71462300  | -1.95468100 | -0.66936800 |
| H  | 5.88879700  | -0.69483000 | -1.10825800 |
| H  | 4.96212200  | -0.01706400 | 2.53335800  |
| H  | 6.32708900  | -0.49227100 | 1.50390100  |
| H  | 5.01611800  | -1.65037100 | 1.82815400  |
| H  | 5.85558400  | 1.55190600  | 0.00598600  |
| H  | 4.49496100  | 1.97933100  | 1.06664100  |
| H  | 4.22197900  | 1.74543900  | -0.67577500 |
| C  | -1.71894900 | -1.46208800 | -0.44092700 |
| C  | -0.83144200 | -0.75709000 | -1.28260100 |
| C  | 0.03316600  | -3.06469300 | -0.01190200 |
| C  | -1.22671900 | -2.57688700 | 0.24000200  |
| H  | 0.01497300  | -1.27957300 | -1.71737500 |
| H  | -1.73583000 | -3.02488600 | 1.08663800  |
| O  | 0.89545500  | -3.75150600 | -0.32904400 |
| C  | -3.11636600 | -1.06023600 | -0.15347000 |
| C  | -4.07228200 | -2.06826500 | 0.04057900  |
| C  | -3.51343000 | 0.28031400  | -0.04180900 |
| C  | -5.39018000 | -1.74744100 | 0.34451500  |
| H  | -3.78531800 | -3.10871700 | -0.07693600 |
| C  | -4.82933500 | 0.59474800  | 0.27761800  |
| H  | -2.79419700 | 1.07985000  | -0.17347600 |
| C  | -5.77099300 | -0.41383700 | 0.46961200  |
| H  | -6.11880900 | -2.53945100 | 0.47995800  |
| H  | -5.11553400 | 1.63631200  | 0.38010300  |
| H  | -6.79828900 | -0.16144100 | 0.71142100  |
| Cl | -1.46083500 | 0.40623700  | -2.43028200 |

**TS2<sup>D</sup><sub>c=0</sub>SR**

Total energy= -1798.40279496  
Sum of electronic and zero-point Energies= -1797.975125  
Sum of electronic and thermal Energies= -1797.946710  
Sum of electronic and thermal Enthalpies= -1797.945766  
Sum of electronic and thermal Free Energies= -1798.035367

|   |             |             |             |
|---|-------------|-------------|-------------|
| C | 0.18856700  | -2.26035000 | -1.00088000 |
| C | -0.24857000 | -0.95129300 | -0.73897300 |
| C | -0.26973600 | 0.00171900  | -1.74700100 |
| C | 0.14985300  | -0.37013500 | -3.02532800 |
| C | 0.59188100  | -1.67153200 | -3.27094500 |
| C | 0.62249100  | -2.64008900 | -2.26239900 |
| C | -0.31425600 | -2.28530400 | 1.23303300  |
| C | -0.55348400 | -0.88852000 | 0.69218200  |
| H | -0.57938600 | 1.02159200  | -1.53639500 |
| H | 0.14593400  | 0.35861800  | -3.82838900 |
| H | 0.92096200  | -1.94291000 | -4.26872800 |
| H | 0.96720600  | -3.64885700 | -2.46237400 |
| N | 0.10686300  | -3.03631000 | 0.15966600  |
| O | -0.44683400 | -2.67324300 | 2.37857200  |
| N | -1.26030300 | -0.00222300 | 1.36772700  |
| C | 0.56351700  | -4.40366000 | 0.26887800  |
| H | 0.41465800  | -4.71520400 | 1.30245200  |
| H | -0.01069700 | -5.05444900 | -0.39529500 |
| H | 1.62611600  | -4.47051000 | 0.01614900  |
| C | -2.15173900 | 0.88692600  | 0.76150200  |
| O | -2.30080800 | 2.03539800  | 1.13256500  |
| O | -2.87636800 | 0.27127700  | -0.17256800 |
| C | -3.95674100 | 0.96547800  | -0.87650200 |
| C | -5.03694700 | 1.37655600  | 0.11749800  |
| C | -3.40474300 | 2.15143400  | -1.65969200 |
| C | -4.47117500 | -0.10927900 | -1.82569400 |
| H | -5.34508600 | 0.51180700  | 0.71173900  |
| H | -4.68262700 | 2.16227000  | 0.78475300  |
| H | -5.90759600 | 1.74343100  | -0.43298900 |
| H | -2.64866100 | 1.81394600  | -2.37464400 |
| H | -4.21957800 | 2.61427300  | -2.22329700 |
| H | -2.97104400 | 2.89822100  | -0.99430000 |
| H | -5.28189400 | 0.29386400  | -2.43755500 |
| H | -3.66558900 | -0.44632300 | -2.48391600 |
| H | -4.84755300 | -0.96712400 | -1.26273700 |
| C | 1.58242200  | 0.90256700  | 1.24686400  |
| C | 1.57741600  | -0.44209800 | 1.59745900  |
| C | -0.34727700 | 1.22138100  | 2.70205400  |
| C | 0.61480000  | 1.72627400  | 1.83663200  |
| H | 1.10758300  | -0.77569400 | 2.51554200  |
| H | 0.41666600  | 2.73186900  | 1.48198900  |
| O | -0.89384200 | 1.13133700  | 3.71975600  |
| C | 2.47692600  | 1.50800000  | 0.22599300  |
| C | 3.00093700  | 2.78637400  | 0.45419400  |
| C | 2.78078700  | 0.85334500  | -0.97429500 |
| C | 3.81132600  | 3.39852000  | -0.49635600 |
| H | 2.78810500  | 3.29306500  | 1.39086900  |
| C | 3.58233400  | 1.47368000  | -1.92670300 |



|    |            |             |             |
|----|------------|-------------|-------------|
| H  | 2.37382800 | -0.13095700 | -1.17575600 |
| C  | 4.10133400 | 2.74457700  | -1.69152600 |
| H  | 4.21784000 | 4.38540000  | -0.30119100 |
| H  | 3.79628700 | 0.95985800  | -2.85832100 |
| H  | 4.73056700 | 3.22260700  | -2.43524100 |
| Cl | 2.79595900 | -1.56203700 | 1.07466400  |

**TS2<sup>D</sup><sub>C=O</sub>SS**

Total energy= -1798.40693649

Sum of electronic and zero-point Energies= -1797.979991

Sum of electronic and thermal Energies= -1797.951413

Sum of electronic and thermal Enthalpies= -1797.950469

Sum of electronic and thermal Free Energies= -1798.038975

|   |             |             |             |
|---|-------------|-------------|-------------|
| C | -0.39494700 | 2.31928400  | 0.25848400  |
| C | -0.99670100 | 1.19977900  | -0.33360700 |
| C | -1.92403700 | 1.36555900  | -1.35085500 |
| C | -2.26813500 | 2.65982700  | -1.74320000 |
| C | -1.68137800 | 3.76516200  | -1.12366100 |
| C | -0.73061100 | 3.61345600  | -0.11240100 |
| C | 0.58442500  | 0.54931700  | 1.32844600  |
| C | -0.36399600 | -0.00023100 | 0.26469500  |
| H | -2.37878400 | 0.49976100  | -1.82302100 |
| H | -2.99917700 | 2.80840300  | -2.53030700 |
| H | -1.96374200 | 4.76528700  | -1.43600800 |
| H | -0.26666700 | 4.47396400  | 0.35746400  |
| N | 0.54822400  | 1.91983800  | 1.21341100  |
| O | 1.24629400  | -0.08824000 | 2.12257000  |
| N | -0.82925500 | -1.24023500 | 0.44670300  |
| C | 1.32148400  | 2.81947500  | 2.04026800  |
| H | 1.95075700  | 2.20658700  | 2.68645900  |
| H | 1.95089500  | 3.46364700  | 1.41903500  |
| H | 0.66586300  | 3.44193100  | 2.65555500  |
| C | -2.15161000 | -1.60061200 | 0.37351100  |
| O | -2.52353900 | -2.75541500 | 0.25510600  |
| O | -2.99161300 | -0.55945400 | 0.56323700  |
| C | -4.43339000 | -0.74555600 | 0.55909400  |
| C | -4.89767700 | -1.29816600 | -0.78573100 |
| C | -4.85708100 | -1.63675400 | 1.72310300  |
| C | -4.94954300 | 0.67578800  | 0.75659800  |
| H | -4.56151100 | -0.64503400 | -1.59719600 |
| H | -4.51105100 | -2.30400300 | -0.94891500 |
| H | -5.99087500 | -1.32760200 | -0.80559800 |
| H | -4.44365800 | -1.24768000 | 2.65807000  |
| H | -5.94808500 | -1.63362500 | 1.80245600  |
| H | -4.51264500 | -2.66027400 | 1.57797300  |
| H | -6.04260100 | 0.68203000  | 0.75612300  |
| H | -4.59494800 | 1.07829500  | 1.70924200  |
| H | -4.58931500 | 1.32270100  | -0.04871100 |
| C | 1.99233400  | -1.16545800 | -0.63070500 |
| C | 1.10416600  | -0.23825700 | -1.22637600 |
| C | 0.27283700  | -2.83347000 | -0.83993400 |
| C | 1.51590500  | -2.45087700 | -0.38542500 |
| H | 0.31299400  | -0.62450700 | -1.85972500 |
| H | 2.00000800  | -3.14036300 | 0.29764600  |
| O | -0.53427400 | -3.38964700 | -1.43940700 |

|    |            |             |             |
|----|------------|-------------|-------------|
| C  | 3.36726000 | -0.85370900 | -0.17736900 |
| C  | 4.35145300 | -1.84275200 | -0.30927500 |
| C  | 3.71826600 | 0.37978500  | 0.38797200  |
| C  | 5.65380800 | -1.60895100 | 0.11786400  |
| H  | 4.09899300 | -2.79044300 | -0.77510500 |
| C  | 5.01856200 | 0.60592200  | 0.82214700  |
| H  | 2.97340200 | 1.15694700  | 0.50664200  |
| C  | 5.98977600 | -0.38471800 | 0.68877500  |
| H  | 6.40506000 | -2.38229200 | -0.00108000 |
| H  | 5.27197900 | 1.56063000  | 1.27115200  |
| H  | 7.00474900 | -0.20056800 | 1.02544300  |
| Cl | 1.71256500 | 1.25399800  | -1.90264400 |

**P<sub>C=O</sub>RR**

Total energy= -1798.47913177

Sum of electronic and zero-point Energies= -1798.047927

Sum of electronic and thermal Energies= -1798.020606

Sum of electronic and thermal Enthalpies= -1798.019662

Sum of electronic and thermal Free Energies= -1798.106735

|    |             |             |             |
|----|-------------|-------------|-------------|
| C  | 2.40259700  | -0.14987700 | 0.72480700  |
| C  | 1.85362900  | 1.20009100  | 0.30141000  |
| C  | 1.17001400  | 0.16854200  | 2.83259200  |
| C  | 2.08443600  | -0.57944700 | 1.94855700  |
| H  | 2.52551200  | 1.97830800  | 0.67704000  |
| H  | 2.47391300  | -1.50684600 | 2.35141100  |
| O  | 1.00439600  | -0.08608700 | 3.99746500  |
| C  | 3.30323800  | -0.93351200 | -0.15732600 |
| C  | 2.76997200  | -1.62435700 | -1.25121000 |
| C  | 4.66655100  | -1.02674100 | 0.12704900  |
| C  | 3.60283900  | -2.39405700 | -2.05578500 |
| H  | 1.70304000  | -1.57123800 | -1.45175300 |
| C  | 5.49758300  | -1.79316400 | -0.68741900 |
| H  | 5.07236500  | -0.49638800 | 0.98329600  |
| C  | 4.96731000  | -2.47448700 | -1.77919200 |
| H  | 3.18471100  | -2.93532800 | -2.89817000 |
| H  | 6.55752600  | -1.85913000 | -0.46486000 |
| H  | 5.61393900  | -3.07407000 | -2.41158600 |
| Cl | 1.80153000  | 1.44977300  | -1.47213500 |
| C  | -1.08813500 | 2.76295700  | -0.22437400 |
| C  | -1.50884300 | 1.45216700  | -0.51478200 |
| C  | -2.57773900 | 1.21361200  | -1.37542300 |
| C  | -3.22497000 | 2.30215600  | -1.94938900 |
| C  | -2.79357200 | 3.60262500  | -1.66224800 |
| C  | -1.72341900 | 3.85834900  | -0.80858100 |
| C  | 0.45036200  | 1.43853000  | 0.89128200  |
| C  | -0.63429700 | 0.55323100  | 0.23030000  |
| H  | -2.87865300 | 0.20032500  | -1.62040000 |
| H  | -4.05185500 | 2.14486000  | -2.63190400 |
| H  | -3.30151200 | 4.44196600  | -2.12689100 |
| H  | -1.39805200 | 4.87340800  | -0.61277900 |
| N  | -0.03289400 | 2.77010000  | 0.66621200  |
| O  | 0.50149100  | 1.23232200  | 2.30246100  |
| N  | -0.64363600 | -0.69990300 | 0.43388700  |
| C  | 0.77558700  | 3.93704700  | 0.94561700  |
| H  | 1.37860600  | 3.74101200  | 1.83414700  |

|   |             |             |             |
|---|-------------|-------------|-------------|
| H | 1.42945800  | 4.20654800  | 0.10587700  |
| H | 0.12234100  | 4.78184800  | 1.17255600  |
| C | -1.60961400 | -1.50820700 | -0.18757000 |
| O | -1.43745500 | -2.02240800 | -1.27002900 |
| O | -2.65308000 | -1.66800400 | 0.61853800  |
| C | -3.73799800 | -2.59349900 | 0.27320300  |
| C | -4.44462200 | -2.11635500 | -0.99037100 |
| C | -3.18659400 | -4.00811300 | 0.13469300  |
| C | -4.66203900 | -2.49011400 | 1.47937000  |
| H | -4.78457000 | -1.08387600 | -0.86422900 |
| H | -3.78809400 | -2.18134300 | -1.85938600 |
| H | -5.32266800 | -2.74336500 | -1.16775100 |
| H | -2.61993900 | -4.27775700 | 1.03019000  |
| H | -4.02174300 | -4.70651600 | 0.03378100  |
| H | -2.54294300 | -4.10055000 | -0.74007300 |
| H | -5.52787200 | -3.14099100 | 1.33552700  |
| H | -4.13830600 | -2.79687600 | 2.38814400  |
| H | -5.01200100 | -1.46235200 | 1.60468600  |

### Pc-oRS

Total energy= -1798.47785439

Sum of electronic and zero-point Energies= -1798.045790

Sum of electronic and thermal Energies= -1798.017767

Sum of electronic and thermal Enthalpies= -1798.016822

Sum of electronic and thermal Free Energies= -1798.106154

|    |             |             |             |
|----|-------------|-------------|-------------|
| C  | -2.73073500 | -0.22655600 | 0.58916100  |
| C  | -1.29171200 | -0.29595600 | 0.12952900  |
| C  | -1.88178400 | 0.87961800  | 2.63136600  |
| C  | -2.95793200 | 0.32659900  | 1.78846800  |
| H  | -0.85157300 | -1.22397200 | 0.50958600  |
| H  | -3.94985900 | 0.35329700  | 2.22506600  |
| O  | -2.03681800 | 1.20908200  | 3.77948700  |
| C  | -3.83269000 | -0.89750600 | -0.14774600 |
| C  | -4.25620200 | -0.47245900 | -1.41258900 |
| C  | -4.50153200 | -1.95561900 | 0.47810400  |
| C  | -5.33003100 | -1.09908100 | -2.03598900 |
| H  | -3.75915800 | 0.35743900  | -1.90266800 |
| C  | -5.56723700 | -2.58846100 | -0.15518100 |
| H  | -4.17298200 | -2.28625800 | 1.45859100  |
| C  | -5.98324300 | -2.16087700 | -1.41287600 |
| H  | -5.65874900 | -0.75433400 | -3.01067700 |
| H  | -6.07177900 | -3.41330800 | 0.33676400  |
| H  | -6.81625700 | -2.65070900 | -1.90624400 |
| Cl | -1.07089600 | -0.36590800 | -1.64749200 |
| C  | 0.63788100  | 2.54634900  | -0.49820800 |
| C  | 1.67645600  | 1.64273300  | -0.19609000 |
| C  | 2.99137200  | 1.89602300  | -0.58647400 |
| C  | 3.26368200  | 3.05434700  | -1.30171900 |
| C  | 2.22419200  | 3.93922600  | -1.61375900 |
| C  | 0.90887000  | 3.70792900  | -1.22491000 |
| C  | -0.42904700 | 0.85529500  | 0.67681900  |
| C  | 1.07106200  | 0.52406900  | 0.51244100  |
| H  | 3.78826600  | 1.20873000  | -0.32423200 |
| H  | 4.27682900  | 3.27581300  | -1.61567600 |
| H  | 2.44845100  | 4.84067100  | -2.17548600 |

|   |             |             |             |
|---|-------------|-------------|-------------|
| H | 0.13083800  | 4.41577100  | -1.48362900 |
| N | -0.57349100 | 2.11042900  | 0.00127700  |
| O | -0.64119000 | 0.99222300  | 2.08501100  |
| N | 1.49543500  | -0.58716400 | 0.95589800  |
| C | -1.84694900 | 2.76963300  | -0.17477300 |
| H | -2.34720500 | 2.91373700  | 0.78754900  |
| H | -1.68402600 | 3.75134500  | -0.61646300 |
| H | -2.51007200 | 2.19707000  | -0.83432800 |
| C | 2.86262000  | -0.90391700 | 0.88503900  |
| O | 3.69869600  | -0.43086800 | 1.62114000  |
| O | 3.05169900  | -1.84101800 | -0.03810000 |
| C | 4.38126600  | -2.42226800 | -0.25101000 |
| C | 5.35921700  | -1.33910000 | -0.69313500 |
| C | 4.83697200  | -3.13992800 | 1.01431900  |
| C | 4.13519200  | -3.41581600 | -1.37879500 |
| H | 4.95004100  | -0.79217800 | -1.54815300 |
| H | 5.57250000  | -0.64100000 | 0.11696500  |
| H | 6.29569800  | -1.80918700 | -1.00562900 |
| H | 4.08241900  | -3.86805200 | 1.32474700  |
| H | 5.76673000  | -3.67595400 | 0.80523400  |
| H | 5.01232100  | -2.43466000 | 1.82682200  |
| H | 5.06773400  | -3.92731300 | -1.62910300 |
| H | 3.39608400  | -4.16130800 | -1.07486800 |
| H | 3.76814100  | -2.89906800 | -2.26927700 |

#### Pc-oSR

Total energy= -1798.47777101

Sum of electronic and zero-point Energies= -1798.045451

Sum of electronic and thermal Energies= -1798.017405

Sum of electronic and thermal Enthalpies= -1798.016460

Sum of electronic and thermal Free Energies= -1798.105923

|   |             |             |             |
|---|-------------|-------------|-------------|
| C | -0.57575000 | 2.42250200  | 0.36555900  |
| C | -1.55097100 | 1.51734300  | -0.09693800 |
| C | -2.75948400 | 1.96277700  | -0.63003300 |
| C | -2.99349500 | 3.32983700  | -0.69891400 |
| C | -2.01736900 | 4.22501200  | -0.24410600 |
| C | -0.80309600 | 3.79781900  | 0.28447800  |
| C | 0.39118000  | 0.34279400  | 0.71760800  |
| C | -1.01288700 | 0.17897900  | 0.09522100  |
| H | -3.49462500 | 1.25715200  | -1.00240400 |
| H | -3.92287100 | 3.70474800  | -1.11094900 |
| H | -2.20781100 | 5.29180200  | -0.30869400 |
| H | -0.06828500 | 4.52009500  | 0.61867100  |
| N | 0.53100600  | 1.76255100  | 0.86462100  |
| O | 0.33937600  | -0.30713500 | 1.98908600  |
| N | -1.44444600 | -0.99172100 | -0.13554000 |
| C | 1.75683800  | 2.39560500  | 1.29457300  |
| H | 2.11400600  | 1.94775700  | 2.22556700  |
| H | 2.54727900  | 2.31489600  | 0.53765300  |
| H | 1.56479100  | 3.45028100  | 1.48759600  |
| C | -2.70587700 | -1.17318500 | -0.72843600 |
| O | -2.88068600 | -1.16934500 | -1.92529400 |
| O | -3.61336600 | -1.42077500 | 0.21090400  |
| C | -4.98708600 | -1.78454600 | -0.15303400 |
| C | -5.65226600 | -0.62874300 | -0.89212900 |

|    |             |             |             |
|----|-------------|-------------|-------------|
| C  | -4.98315100 | -3.07261800 | -0.96856700 |
| C  | -5.64456100 | -2.00733900 | 1.20268500  |
| H  | -5.59592000 | 0.28405200  | -0.29113900 |
| H  | -5.18328200 | -0.45752800 | -1.86222100 |
| H  | -6.70771400 | -0.86618600 | -1.05061500 |
| H  | -4.42991300 | -3.85100000 | -0.43584500 |
| H  | -6.01377400 | -3.41320200 | -1.09995500 |
| H  | -4.53586600 | -2.92076800 | -1.95065600 |
| H  | -6.69239500 | -2.28379200 | 1.06210900  |
| H  | -5.13855600 | -2.81092000 | 1.74349200  |
| H  | -5.59935400 | -1.09570900 | 1.80365600  |
| C  | 2.76311200  | -0.56686700 | 0.51998600  |
| C  | 1.44048200  | -0.34386600 | -0.17815000 |
| C  | 1.46809300  | -0.72704100 | 2.62068600  |
| C  | 2.72226700  | -0.75727000 | 1.84585800  |
| H  | 1.02708100  | -1.32157000 | -0.44890800 |
| H  | 3.61308500  | -0.99740600 | 2.41492200  |
| O  | 1.38610700  | -1.07971800 | 3.76961100  |
| C  | 4.03319200  | -0.76216900 | -0.22585000 |
| C  | 4.63807600  | 0.26429600  | -0.96103400 |
| C  | 4.66951600  | -2.00526600 | -0.13523100 |
| C  | 5.85684000  | 0.04390900  | -1.59409100 |
| H  | 4.16797700  | 1.23949300  | -1.02434500 |
| C  | 5.88330700  | -2.22481400 | -0.77995700 |
| H  | 4.20008400  | -2.80177100 | 0.43395400  |
| C  | 6.47879900  | -1.20031100 | -1.51021800 |
| H  | 6.32371300  | 0.84926800  | -2.15136200 |
| H  | 6.36197900  | -3.19578700 | -0.70797500 |
| H  | 7.42739200  | -1.36798800 | -2.00960900 |
| Cl | 1.54655000  | 0.56370700  | -1.71945700 |

### P<sub>C=O</sub>SS

|                                              |                |
|----------------------------------------------|----------------|
| Total energy=                                | -1798.47958980 |
| Sum of electronic and zero-point Energies=   | -1798.048157   |
| Sum of electronic and thermal Energies=      | -1798.020936   |
| Sum of electronic and thermal Enthalpies=    | -1798.019992   |
| Sum of electronic and thermal Free Energies= | -1798.106039   |

|   |             |             |             |
|---|-------------|-------------|-------------|
| C | -2.82154100 | -1.39955400 | -0.55791500 |
| C | -2.41255300 | -0.10587600 | -0.18242400 |
| C | -3.17177000 | 1.01302600  | -0.52217600 |
| C | -4.32920000 | 0.82987000  | -1.26933700 |
| C | -4.71252700 | -0.45841900 | -1.66173100 |
| C | -3.97446500 | -1.58831000 | -1.31972300 |
| C | -0.79793200 | -1.76225600 | 0.50730100  |
| C | -1.15702200 | -0.25516900 | 0.54527700  |
| H | -2.86904800 | 2.00658600  | -0.20937900 |
| H | -4.93389600 | 1.68352300  | -1.55189800 |
| H | -5.61534000 | -0.58446200 | -2.25141300 |
| H | -4.28881800 | -2.57534300 | -1.63813300 |
| N | -1.96008800 | -2.36391900 | -0.07648700 |
| O | -0.64291500 | -2.30221900 | 1.82016100  |
| N | -0.37799400 | 0.55996900  | 1.12997400  |
| C | -1.98272600 | -3.74691200 | -0.49971300 |
| H | -1.36941300 | -4.33442400 | 0.18582400  |
| H | -3.00367600 | -4.12810500 | -0.43372000 |

|    |             |             |             |
|----|-------------|-------------|-------------|
| H  | -1.61813400 | -3.87839400 | -1.52692300 |
| C  | -0.66563200 | 1.93313000  | 1.15567600  |
| O  | -1.46190500 | 2.44930100  | 1.90562200  |
| O  | 0.13862000  | 2.55267700  | 0.29364900  |
| C  | 0.15468700  | 4.01430500  | 0.18921400  |
| C  | -1.20622600 | 4.51255600  | -0.28261000 |
| C  | 0.56990900  | 4.62402000  | 1.52316800  |
| C  | 1.22149000  | 4.25624500  | -0.87104400 |
| H  | -1.49649800 | 3.99577100  | -1.20237600 |
| H  | -1.96903600 | 4.35368100  | 0.48075700  |
| H  | -1.14251000 | 5.58285800  | -0.49647000 |
| H  | 1.51003900  | 4.17976800  | 1.86183600  |
| H  | 0.72569400  | 5.69813300  | 1.39024000  |
| H  | -0.19482200 | 4.47088300  | 2.28442500  |
| H  | 1.32830400  | 5.32848100  | -1.05196000 |
| H  | 2.18371100  | 3.85937800  | -0.53560100 |
| H  | 0.94514600  | 3.76642600  | -1.80861700 |
| C  | 1.71744600  | -1.55766800 | 0.44453000  |
| C  | 0.48572800  | -2.03450700 | -0.30146100 |
| C  | 0.52524400  | -2.16472000 | 2.51054100  |
| C  | 1.71007200  | -1.68599700 | 1.77328300  |
| H  | 0.57500800  | -3.11392400 | -0.45970200 |
| H  | 2.56682000  | -1.42068900 | 2.38113500  |
| O  | 0.53436000  | -2.45932800 | 3.67783800  |
| C  | 2.89679200  | -1.00986100 | -0.27273000 |
| C  | 2.85247100  | 0.30498600  | -0.75066900 |
| C  | 4.05617900  | -1.77000300 | -0.42880600 |
| C  | 3.96478300  | 0.84664900  | -1.38531700 |
| H  | 1.95324400  | 0.89918800  | -0.60297100 |
| C  | 5.16525200  | -1.22299600 | -1.07116700 |
| H  | 4.08686400  | -2.78627600 | -0.04764600 |
| C  | 5.11986400  | 0.08301600  | -1.55062200 |
| H  | 3.93113400  | 1.86842800  | -1.74986500 |
| H  | 6.06509400  | -1.81738000 | -1.19179800 |
| H  | 5.98523400  | 0.50893900  | -2.04800200 |
| Cl | 0.30683800  | -1.34071600 | -1.94468100 |

**Coordinates of stationary points of IRC points involved in TS2**  
**IRC-F-100**

|   |             |             |             |
|---|-------------|-------------|-------------|
| C | -0.21435800 | -0.51973500 | -0.77566800 |
| C | -0.91175300 | -1.69237900 | 0.14510900  |
| C | -2.19828400 | -1.27700600 | -0.51183600 |
| C | -1.68392800 | -0.18106800 | -1.09387900 |
| O | 0.58023500  | -0.85537500 | -1.75748900 |
| C | 3.67367300  | -0.49665400 | -0.65895300 |
| C | 4.96358300  | -0.78782700 | -0.22973600 |
| C | 6.05858900  | -0.39872800 | -0.99952800 |
| C | 5.83356600  | 0.28212400  | -2.19346000 |
| C | 4.53232100  | 0.56301200  | -2.62098500 |
| C | 3.43485300  | 0.16965100  | -1.85861900 |
| C | 2.64341800  | -1.01180600 | 0.32467000  |
| C | 3.47453100  | -1.52155900 | 1.55372500  |
| C | 4.95332800  | -1.54048300 | 1.07484300  |
| H | 7.07059900  | -0.62051800 | -0.67305500 |
| H | 6.67787600  | 0.59388400  | -2.80062400 |
| H | 4.37741200  | 1.08332100  | -3.56092800 |
| H | 2.40765700  | 0.32943600  | -2.17669400 |
| H | 3.14668900  | -2.53469500 | 1.79432200  |
| H | 5.62240700  | -1.08582600 | 1.81420200  |
| H | 2.01900300  | -1.78186300 | -0.12997400 |
| H | 5.30043900  | -2.56847500 | 0.92926700  |
| C | 2.05179600  | 1.04261100  | 1.63046300  |
| C | 0.51455500  | 0.38341000  | 0.21768800  |
| N | 1.11349000  | 1.94415100  | 1.71566700  |
| N | 1.72346000  | 0.07637800  | 0.71561100  |
| N | 0.16375900  | 1.51397500  | 0.82122500  |
| C | 3.26786800  | 0.84761400  | 2.46345100  |
| H | 4.16518000  | 1.12992600  | 1.90013100  |
| H | 3.20487200  | 1.48069400  | 3.34924900  |
| C | -0.98180000 | 2.33083900  | 0.53192100  |
| C | -0.92182500 | 3.14585700  | -0.60305500 |
| C | -2.08168900 | 2.28312200  | 1.38558800  |
| C | -2.01959900 | 3.96207200  | -0.85935600 |
| C | -3.15492600 | 3.12426300  | 1.08940400  |
| C | -3.13852800 | 3.96939300  | -0.02006900 |
| H | -2.00217100 | 4.60903000  | -1.73284200 |
| H | -4.02534300 | 3.11340500  | 1.74000000  |
| C | 0.27414600  | 3.09920300  | -1.51751700 |
| H | 1.20275700  | 3.28110900  | -0.96734100 |
| H | 0.36249500  | 2.11327900  | -1.99061700 |
| H | 0.18550600  | 3.84921600  | -2.30401600 |
| C | -4.31154400 | 4.86284300  | -0.32945800 |
| H | -3.98124400 | 5.88487400  | -0.53301600 |
| H | -4.84274700 | 4.50829100  | -1.21812100 |
| H | -5.02021900 | 4.88773500  | 0.50039000  |
| C | -2.12255500 | 1.32294400  | 2.54284200  |
| H | -2.27109900 | 0.30064900  | 2.17326600  |
| H | -1.19086200 | 1.34082500  | 3.11405200  |
| H | -2.94958800 | 1.56094700  | 3.21327200  |
| H | -0.87056200 | -1.56906300 | 1.23287400  |
| H | -2.12655800 | 0.61817000  | -1.68421500 |
| C | -3.50286500 | -1.94046700 | -0.48995900 |
| C | -3.79925000 | -2.87014400 | 0.51361300  |
| C | -4.44365200 | -1.70496600 | -1.50105100 |

|    |             |             |             |
|----|-------------|-------------|-------------|
| C  | -5.01786100 | -3.54133800 | 0.51501400  |
| H  | -3.06457200 | -3.06946500 | 1.28917400  |
| C  | -5.65718500 | -2.38240400 | -1.50285700 |
| H  | -4.20476900 | -1.00495400 | -2.29667700 |
| C  | -5.94737200 | -3.30222100 | -0.49483900 |
| H  | -5.23740600 | -4.25969500 | 1.29839500  |
| H  | -6.37572800 | -2.20189400 | -2.29599300 |
| H  | -6.89209100 | -3.83625400 | -0.50180400 |
| Cl | -0.30789900 | -3.35020300 | -0.17590200 |
| C  | 3.29304400  | -0.65244000 | 2.80955100  |
| H  | 2.35427100  | -0.90641300 | 3.31315000  |
| H  | 4.10220300  | -0.86338300 | 3.51279100  |

**IRC-F-50**

|   |             |             |             |
|---|-------------|-------------|-------------|
| C | -0.20822300 | -0.44778400 | -0.83044300 |
| C | -0.82646800 | -1.69253200 | 0.23381200  |
| C | -2.13001900 | -1.34264600 | -0.41425200 |
| C | -1.70622900 | -0.22116900 | -1.01389400 |
| O | 0.51413400  | -0.70188800 | -1.87593700 |
| C | 3.67162500  | -0.46764900 | -0.75053000 |
| C | 4.93987900  | -0.80895900 | -0.29376900 |
| C | 6.06785800  | -0.45091700 | -1.03045900 |
| C | 5.89963400  | 0.25302600  | -2.21993200 |
| C | 4.62062100  | 0.58973900  | -2.67437900 |
| C | 3.49005400  | 0.22625800  | -1.94546500 |
| C | 2.60104600  | -0.97036700 | 0.19717300  |
| C | 3.37806000  | -1.57846500 | 1.41270800  |
| C | 4.87744500  | -1.56806500 | 1.00553700  |
| H | 7.06177600  | -0.71506200 | -0.68091700 |
| H | 6.76966400  | 0.54049400  | -2.80214400 |
| H | 4.50901900  | 1.13009200  | -3.60910500 |
| H | 2.48013800  | 0.43810700  | -2.28706600 |
| H | 3.03595100  | -2.60569700 | 1.55306300  |
| H | 5.49885500  | -1.09622100 | 1.77596900  |
| H | 1.94377600  | -1.68691300 | -0.29804900 |
| H | 5.25544600  | -2.58751400 | 0.88195600  |
| C | 2.03444600  | 1.02467400  | 1.62612200  |
| C | 0.52468900  | 0.46612900  | 0.14594300  |
| N | 1.10098500  | 1.92887500  | 1.74553900  |
| N | 1.72675800  | 0.13408600  | 0.63158100  |
| N | 0.16912800  | 1.56857000  | 0.79958700  |
| C | 3.19318200  | 0.71346200  | 2.50524800  |
| H | 4.13380100  | 1.00078400  | 2.02072500  |
| H | 3.10121900  | 1.27253100  | 3.43708100  |
| C | -0.97326600 | 2.40088800  | 0.53306500  |
| C | -0.92170300 | 3.25070200  | -0.57740800 |
| C | -2.07364600 | 2.32331000  | 1.38535900  |
| C | -2.03664800 | 4.04910800  | -0.82176900 |
| C | -3.16400600 | 3.14523000  | 1.10035900  |
| C | -3.16455100 | 4.00745400  | 0.00363500  |
| H | -2.02582700 | 4.71761500  | -1.67900100 |
| H | -4.03605400 | 3.10315100  | 1.74751900  |
| C | 0.28292500  | 3.26764600  | -1.48147600 |
| H | 1.20458400  | 3.42168700  | -0.91132800 |
| H | 0.38170800  | 2.31240700  | -2.01170400 |
| H | 0.19603500  | 4.06373600  | -2.22203900 |
| C | -4.36572200 | 4.86326300  | -0.30529800 |



|    |             |             |             |
|----|-------------|-------------|-------------|
| H  | -4.07134000 | 5.89826100  | -0.49793500 |
| H  | -4.87766400 | 4.49726200  | -1.20061100 |
| H  | -5.08059600 | 4.85467400  | 0.51959200  |
| C  | -2.08783900 | 1.35594700  | 2.53662000  |
| H  | -2.09597500 | 0.32599000  | 2.16087500  |
| H  | -1.20359500 | 1.47393000  | 3.16859500  |
| H  | -2.97914600 | 1.49800100  | 3.14918000  |
| H  | -0.76595300 | -1.43669200 | 1.29791000  |
| H  | -2.23070000 | 0.56363900  | -1.55050000 |
| C  | -3.41935800 | -2.02965400 | -0.44399200 |
| C  | -3.82689500 | -2.93186300 | 0.54380300  |
| C  | -4.25201400 | -1.79388800 | -1.54533900 |
| C  | -5.06722600 | -3.55765800 | 0.44213300  |
| H  | -3.17367800 | -3.13619200 | 1.38764400  |
| C  | -5.48615800 | -2.41835500 | -1.64499400 |
| H  | -3.90841400 | -1.12783700 | -2.33094300 |
| C  | -5.89856000 | -3.29980300 | -0.64637400 |
| H  | -5.38572500 | -4.25190700 | 1.21322700  |
| H  | -6.12252800 | -2.22754300 | -2.50321300 |
| H  | -6.86173000 | -3.79413700 | -0.72268500 |
| Cl | -0.35197100 | -3.44836600 | 0.19515500  |
| C  | 3.13695900  | -0.81201600 | 2.72336600  |
| H  | 2.15586900  | -1.06836400 | 3.13794700  |
| H  | 3.88671500  | -1.11466200 | 3.45857100  |

#### IRC-F-40

|   |             |             |             |
|---|-------------|-------------|-------------|
| C | -0.19943700 | -0.40128700 | -0.86449600 |
| C | -0.80509300 | -1.73088600 | 0.25333100  |
| C | -2.10107500 | -1.36848000 | -0.39678700 |
| C | -1.70432400 | -0.23512500 | -0.99093100 |
| O | 0.49848700  | -0.62039600 | -1.92111900 |
| C | 3.67107600  | -0.46549000 | -0.76241800 |
| C | 4.93676300  | -0.81020600 | -0.30100900 |
| C | 6.06860500  | -0.45402300 | -1.03270300 |
| C | 5.90732500  | 0.25121200  | -2.22224300 |
| C | 4.63116500  | 0.59264400  | -2.68080400 |
| C | 3.49700100  | 0.23243000  | -1.95633200 |
| C | 2.59550400  | -0.96143800 | 0.18379800  |
| C | 3.36751900  | -1.57915900 | 1.39872200  |
| C | 4.86890200  | -1.56611600 | 0.99965000  |
| H | 7.06034100  | -0.72040600 | -0.67873100 |
| H | 6.78044900  | 0.53698700  | -2.80060200 |
| H | 4.52449200  | 1.13563400  | -3.61455100 |
| H | 2.49063100  | 0.45417700  | -2.30117600 |
| H | 3.02438100  | -2.60742500 | 1.52798900  |
| H | 5.48450600  | -1.08932400 | 1.77176300  |
| H | 1.93017600  | -1.67412800 | -0.30757900 |
| H | 5.25066000  | -2.58481800 | 0.88219000  |
| C | 2.03014600  | 1.02451500  | 1.62927700  |
| C | 0.53063500  | 0.48500800  | 0.13258600  |
| N | 1.09520900  | 1.92633500  | 1.75475800  |
| N | 1.73008300  | 0.14760200  | 0.62025400  |
| N | 0.17088200  | 1.57980600  | 0.79661800  |
| C | 3.18246400  | 0.70236100  | 2.51234200  |
| H | 4.12655000  | 0.99219700  | 2.03610800  |
| H | 3.08604700  | 1.25275400  | 3.44884200  |
| C | -0.97078500 | 2.41300000  | 0.53132400  |

|    |             |             |             |
|----|-------------|-------------|-------------|
| C  | -0.92189700 | 3.26476700  | -0.57785100 |
| C  | -2.07083900 | 2.32996600  | 1.38373400  |
| C  | -2.04062800 | 4.05841200  | -0.82130100 |
| C  | -3.16428400 | 3.14788800  | 1.10006700  |
| C  | -3.16839500 | 4.01084900  | 0.00377200  |
| H  | -2.03248400 | 4.72827900  | -1.67751300 |
| H  | -4.03625700 | 3.10145900  | 1.74703000  |
| C  | 0.28261100  | 3.29075800  | -1.48197700 |
| H  | 1.20573800  | 3.42583000  | -0.90949200 |
| H  | 0.37338300  | 2.34621400  | -2.03222600 |
| H  | 0.20152000  | 4.10276000  | -2.20578400 |
| C  | -4.37333000 | 4.86150600  | -0.30463400 |
| H  | -4.08387400 | 5.89856900  | -0.49363300 |
| H  | -4.88179200 | 4.49562200  | -1.20196100 |
| H  | -5.08957000 | 4.84678100  | 0.51897300  |
| C  | -2.07949300 | 1.36029400  | 2.53307200  |
| H  | -2.05743100 | 0.33125500  | 2.15543600  |
| H  | -1.20747200 | 1.49784700  | 3.17794500  |
| H  | -2.98263700 | 1.48046600  | 3.13274300  |
| H  | -0.74296100 | -1.46088100 | 1.31299100  |
| H  | -2.25991700 | 0.54805800  | -1.49939500 |
| C  | -3.39564900 | -2.04799000 | -0.43780900 |
| C  | -3.82171700 | -2.94665000 | 0.54505700  |
| C  | -4.21764500 | -1.80059300 | -1.54493700 |
| C  | -5.06927600 | -3.55612800 | 0.43343800  |
| H  | -3.17811100 | -3.15954700 | 1.39392700  |
| C  | -5.46030400 | -2.40649600 | -1.65321400 |
| H  | -3.85926500 | -1.13933900 | -2.32786000 |
| C  | -5.89087600 | -3.28410500 | -0.65905300 |
| H  | -5.40191000 | -4.24786000 | 1.20083100  |
| H  | -6.08857400 | -2.20471700 | -2.51489400 |
| H  | -6.86038700 | -3.76481400 | -0.74204800 |
| Cl | -0.38712100 | -3.50981000 | 0.24888300  |
| C  | 3.12079400  | -0.82489600 | 2.71538100  |
| H  | 2.13682300  | -1.08272600 | 3.12214700  |
| H  | 3.86592200  | -1.13710400 | 3.45126500  |

### IRC-F-30

|   |             |             |             |
|---|-------------|-------------|-------------|
| C | -0.19201500 | -0.33431700 | -0.90707300 |
| C | -0.79316600 | -1.77987100 | 0.29030000  |
| C | -2.06883200 | -1.39587600 | -0.37960200 |
| C | -1.70029500 | -0.24949600 | -0.96791900 |
| O | 0.48045100  | -0.54810900 | -1.96190500 |
| C | 3.67008100  | -0.46509700 | -0.77288900 |
| C | 4.93379800  | -0.81132600 | -0.30724600 |
| C | 6.06858600  | -0.45578500 | -1.03467700 |
| C | 5.91280800  | 0.25032800  | -2.22433300 |
| C | 4.63893800  | 0.59468700  | -2.68654400 |
| C | 3.50226800  | 0.23612100  | -1.96579300 |
| C | 2.59049800  | -0.95349700 | 0.17279100  |
| C | 3.35855200  | -1.57877500 | 1.38749700  |
| C | 4.86153500  | -1.56399000 | 0.99486200  |
| H | 7.05867500  | -0.72302400 | -0.67680700 |
| H | 6.78837000  | 0.53540900  | -2.79927500 |
| H | 4.53585500  | 1.13989500  | -3.61936000 |
| H | 2.49965100  | 0.46662200  | -2.31447000 |
| H | 3.01446300  | -2.60777900 | 1.50733100  |

|    |             |             |             |
|----|-------------|-------------|-------------|
| H  | 5.47282000  | -1.08320400 | 1.76797900  |
| H  | 1.91602000  | -1.66367800 | -0.31121100 |
| H  | 5.24587400  | -2.58226100 | 0.88262500  |
| C  | 2.02636400  | 1.02436600  | 1.63207200  |
| C  | 0.53847800  | 0.50660000  | 0.11740400  |
| N  | 1.09022900  | 1.92399200  | 1.76395100  |
| N  | 1.73454300  | 0.16153600  | 0.60845700  |
| N  | 0.17390800  | 1.59254000  | 0.79363000  |
| C  | 3.17307800  | 0.69328500  | 2.51851900  |
| H  | 4.11996100  | 0.98534500  | 2.04922200  |
| H  | 3.07255900  | 1.23671300  | 3.45860600  |
| C  | -0.96738800 | 2.42571900  | 0.52975300  |
| C  | -0.92208900 | 3.27821000  | -0.57902200 |
| C  | -2.06702400 | 2.33698900  | 1.38247600  |
| C  | -2.04477900 | 4.06661400  | -0.82179000 |
| C  | -3.16373800 | 3.15055200  | 1.09991100  |
| C  | -3.17187300 | 4.01372600  | 0.00366200  |
| H  | -2.03983200 | 4.73717700  | -1.67748200 |
| H  | -4.03544400 | 3.09993500  | 1.74692100  |
| C  | 0.28213900  | 3.31318800  | -1.48339300 |
| H  | 1.20690600  | 3.42779400  | -0.90925400 |
| H  | 0.36431100  | 2.38093300  | -2.05515700 |
| H  | 0.20746400  | 4.14154100  | -2.18913300 |
| C  | -4.38039400 | 4.85951300  | -0.30388400 |
| H  | -4.09555200 | 5.89853900  | -0.48912200 |
| H  | -4.88564200 | 4.49408700  | -1.20319200 |
| H  | -5.09779300 | 4.83877200  | 0.51856300  |
| C  | -2.07072100 | 1.36461700  | 2.52950600  |
| H  | -2.02558000 | 0.33741800  | 2.14883500  |
| H  | -1.20807900 | 1.51597100  | 3.18378600  |
| H  | -2.98211700 | 1.46736200  | 3.11977300  |
| H  | -0.74709700 | -1.50356900 | 1.34859100  |
| H  | -2.29341000 | 0.52680600  | -1.44443300 |
| C  | -3.37196300 | -2.06469300 | -0.43642900 |
| C  | -3.81472800 | -2.95988800 | 0.54224400  |
| C  | -4.18685400 | -1.80567700 | -1.54647900 |
| C  | -5.06884700 | -3.55418500 | 0.42430000  |
| H  | -3.17823200 | -3.18068400 | 1.39421800  |
| C  | -5.43788900 | -2.39419400 | -1.66009900 |
| H  | -3.81714900 | -1.14875600 | -2.32774900 |
| C  | -5.88347100 | -3.26881700 | -0.67011500 |
| H  | -5.41271900 | -4.24362600 | 1.18882800  |
| H  | -6.06048500 | -2.18165100 | -2.52333400 |
| H  | -6.85873300 | -3.73695700 | -0.75777900 |
| Cl | -0.42071500 | -3.57294200 | 0.29719500  |
| C  | 3.10718000  | -0.83513100 | 2.70911800  |
| H  | 2.12089600  | -1.09425400 | 3.10930000  |
| H  | 3.84855100  | -1.15517500 | 3.44539900  |

**IRC-F-20**

|   |             |             |             |
|---|-------------|-------------|-------------|
| C | -0.18908800 | -0.26282700 | -0.94666500 |
| C | -0.78299500 | -1.83515700 | 0.32705400  |
| C | -2.03461200 | -1.42530900 | -0.36286100 |
| C | -1.69487900 | -0.26037100 | -0.93607800 |
| O | 0.45955300  | -0.49037800 | -1.99518500 |
| C | 3.66839400  | -0.46438400 | -0.78304400 |
| C | 4.93032700  | -0.81178100 | -0.31335800 |

|    |             |             |             |
|----|-------------|-------------|-------------|
| C  | 6.06779400  | -0.45666000 | -1.03676700 |
| C  | 5.91699500  | 0.25032500  | -2.22649200 |
| C  | 4.64521000  | 0.59676800  | -2.69245300 |
| C  | 3.50625300  | 0.23918800  | -1.97530600 |
| C  | 2.58515000  | -0.94465200 | 0.16242000  |
| C  | 3.34912400  | -1.57767300 | 1.37642900  |
| C  | 4.85361500  | -1.56175300 | 0.98990100  |
| H  | 7.05639900  | -0.72452200 | -0.67532000 |
| H  | 6.79477200  | 0.53508600  | -2.79814400 |
| H  | 4.54546600  | 1.14373500  | -3.62456200 |
| H  | 2.50725100  | 0.47714400  | -2.32820200 |
| H  | 3.00365700  | -2.60724200 | 1.48650400  |
| H  | 5.46116500  | -1.07798200 | 1.76413100  |
| H  | 1.89911400  | -1.65083400 | -0.31305500 |
| H  | 5.23975500  | -2.57977200 | 0.88204400  |
| C  | 2.02367100  | 1.02569500  | 1.63494300  |
| C  | 0.54768600  | 0.53124900  | 0.10209300  |
| N  | 1.08738400  | 1.92450200  | 1.77223100  |
| N  | 1.74002100  | 0.17752400  | 0.59681500  |
| N  | 0.17922700  | 1.60901300  | 0.79026700  |
| C  | 3.16389100  | 0.68453200  | 2.52549900  |
| H  | 4.11403400  | 0.97865000  | 2.06416200  |
| H  | 3.05863300  | 1.22052600  | 3.46929400  |
| C  | -0.96241100 | 2.44121700  | 0.52852500  |
| C  | -0.92233000 | 3.29322000  | -0.58085100 |
| C  | -2.06161900 | 2.34547100  | 1.38156400  |
| C  | -2.04984400 | 4.07501500  | -0.82308400 |
| C  | -3.16241400 | 3.15350500  | 1.09993900  |
| C  | -3.17567000 | 4.01654700  | 0.00346000  |
| H  | -2.04926600 | 4.74551800  | -1.67883800 |
| H  | -4.03371200 | 3.09794500  | 1.74709200  |
| C  | 0.28070800  | 3.33747400  | -1.48670400 |
| H  | 1.20797300  | 3.42738600  | -0.91239200 |
| H  | 0.35168100  | 2.42059900  | -2.08384600 |
| H  | 0.21363000  | 4.18445400  | -2.17083700 |
| C  | -4.38817700 | 4.85698100  | -0.30282700 |
| H  | -4.10839300 | 5.89820500  | -0.48341900 |
| H  | -4.88986800 | 4.49252600  | -1.20449300 |
| H  | -5.10682900 | 4.82927900  | 0.51829900  |
| C  | -2.06050800 | 1.36959200  | 2.52564100  |
| H  | -1.99554900 | 0.34478300  | 2.14131400  |
| H  | -1.20620400 | 1.53195500  | 3.18811300  |
| H  | -2.97863700 | 1.45660200  | 3.10788100  |
| H  | -0.75555600 | -1.55269700 | 1.38457000  |
| H  | -2.32812700 | 0.51085500  | -1.36781700 |
| C  | -3.34696500 | -2.08300100 | -0.43928100 |
| C  | -3.80577700 | -2.97482000 | 0.53532100  |
| C  | -4.15675300 | -1.81000500 | -1.54988800 |
| C  | -5.06697300 | -3.55244200 | 0.41341800  |
| H  | -3.17468300 | -3.20452200 | 1.38870600  |
| C  | -5.41679500 | -2.38015400 | -1.66690400 |
| H  | -3.77685700 | -1.15640700 | -2.32910600 |
| C  | -5.87623800 | -3.25215900 | -0.68120600 |
| H  | -5.42130800 | -4.23949000 | 1.17534700  |
| H  | -6.03519400 | -2.15539100 | -2.53008800 |
| H  | -6.85770700 | -3.70656700 | -0.77206800 |
| Cl | -0.45344400 | -3.63890400 | 0.34285600  |

|   |            |             |            |
|---|------------|-------------|------------|
| C | 3.09330600 | -0.84499600 | 2.70302600 |
| H | 2.10454900 | -1.10515500 | 3.09623800 |
| H | 3.83066600 | -1.17321600 | 3.43969600 |

**IRC-F-10**

|   |             |             |             |
|---|-------------|-------------|-------------|
| C | -0.19207000 | -0.19513600 | -0.97851900 |
| C | -0.77904100 | -1.90103000 | 0.34520100  |
| C | -2.00127500 | -1.45548200 | -0.34895900 |
| C | -1.68832200 | -0.25662400 | -0.88021200 |
| O | 0.43640100  | -0.46578600 | -2.01589100 |
| C | 3.66669400  | -0.46286000 | -0.79245100 |
| C | 4.92677000  | -0.81158100 | -0.31883600 |
| C | 6.06664600  | -0.45671500 | -1.03845500 |
| C | 5.92000100  | 0.25119000  | -2.22813900 |
| C | 4.65009000  | 0.59937100  | -2.69772400 |
| C | 3.50906000  | 0.24236900  | -1.98404600 |
| C | 2.57946500  | -0.93407000 | 0.15186300  |
| C | 3.33885800  | -1.57542800 | 1.36555800  |
| C | 4.84500400  | -1.55975000 | 0.98491600  |
| H | 7.05397600  | -0.72515100 | -0.67401200 |
| H | 6.79967700  | 0.53579800  | -2.79687600 |
| H | 4.55354200  | 1.14767100  | -3.62933400 |
| H | 2.51285700  | 0.48542700  | -2.34099700 |
| H | 2.99115000  | -2.60523700 | 1.46546200  |
| H | 5.44938400  | -1.07441300 | 1.76065500  |
| H | 1.88206000  | -1.63458100 | -0.31743000 |
| H | 5.23170300  | -2.57788600 | 0.88054100  |
| C | 2.01933300  | 1.02594000  | 1.63940000  |
| C | 0.56182600  | 0.56886200  | 0.07869700  |
| N | 1.08451000  | 1.92541000  | 1.78308300  |
| N | 1.74565100  | 0.19774100  | 0.58266000  |
| N | 0.18827100  | 1.63316600  | 0.78574100  |
| C | 3.15416800  | 0.67561800  | 2.53200000  |
| H | 4.10594100  | 0.97246100  | 2.07570100  |
| H | 3.04605600  | 1.20527100  | 3.47899900  |
| C | -0.95523500 | 2.46228700  | 0.52955900  |
| C | -0.92276800 | 3.31012200  | -0.58298800 |
| C | -2.05443800 | 2.35572800  | 1.38214600  |
| C | -2.05641100 | 4.08248800  | -0.82603300 |
| C | -3.16054500 | 3.15619200  | 1.10026800  |
| C | -3.17979500 | 4.01859200  | 0.00301200  |
| H | -2.06206600 | 4.75108000  | -1.68324800 |
| H | -4.03186900 | 3.09440400  | 1.74683300  |
| C | 0.27783800  | 3.36130300  | -1.49209300 |
| H | 1.20858100  | 3.42308200  | -0.92007900 |
| H | 0.33386900  | 2.46161700  | -2.11600200 |
| H | 0.21976500  | 4.22716300  | -2.15301700 |
| C | -4.39561500 | 4.85457900  | -0.30161800 |
| H | -4.11952400 | 5.89764300  | -0.47727500 |
| H | -4.89426800 | 4.49207500  | -1.20571700 |
| H | -5.11536700 | 4.82070100  | 0.51827000  |
| C | -2.05041000 | 1.37285300  | 2.52057000  |
| H | -1.97061100 | 0.35146000  | 2.12966100  |
| H | -1.20357400 | 1.54052300  | 3.19114100  |
| H | -2.97416900 | 1.44598000  | 3.09576900  |
| H | -0.71969100 | -1.58098300 | 1.38665100  |
| H | -2.36126400 | 0.52947200  | -1.21908100 |

|    |             |             |             |
|----|-------------|-------------|-------------|
| C  | -3.32170800 | -2.10306600 | -0.45034100 |
| C  | -3.79472300 | -2.98992900 | 0.52262100  |
| C  | -4.13021300 | -1.81318300 | -1.55728200 |
| C  | -5.06317900 | -3.54992900 | 0.40220600  |
| H  | -3.16674300 | -3.22667700 | 1.37617100  |
| C  | -5.39975900 | -2.36564800 | -1.67317200 |
| H  | -3.74302200 | -1.15971600 | -2.33329700 |
| C  | -5.86980000 | -3.23534600 | -0.69080400 |
| H  | -5.42619800 | -4.23269000 | 1.16395000  |
| H  | -6.01749000 | -2.12795400 | -2.53342200 |
| H  | -6.85781200 | -3.67545600 | -0.78163000 |
| Cl | -0.48229800 | -3.70461400 | 0.38577800  |
| C  | 3.08159000  | -0.85437500 | 2.69788400  |
| H  | 2.09211500  | -1.11668100 | 3.08775200  |
| H  | 3.81802000  | -1.18931800 | 3.43241900  |

**IRC-1**

|   |             |             |             |
|---|-------------|-------------|-------------|
| C | -0.19923800 | -0.15748400 | -1.02928300 |
| C | -0.82814700 | -2.01109700 | 0.34589600  |
| C | -1.97156800 | -1.51331900 | -0.34688600 |
| C | -1.66880400 | -0.27046200 | -0.84581300 |
| O | 0.44339000  | -0.51918400 | -2.02103100 |
| C | 3.67155600  | -0.49557400 | -0.80531600 |
| C | 4.93086200  | -0.84455500 | -0.33052400 |
| C | 6.07148700  | -0.48959500 | -1.04911300 |
| C | 5.92553500  | 0.21815800  | -2.23864700 |
| C | 4.65628100  | 0.56660300  | -2.70942300 |
| C | 3.51493300  | 0.21054500  | -1.99641000 |
| C | 2.58190000  | -0.96341100 | 0.13662700  |
| C | 3.33986300  | -1.60773300 | 1.35212300  |
| C | 4.84694600  | -1.59257100 | 0.97290800  |
| H | 7.05848200  | -0.75817200 | -0.68399200 |
| H | 6.80556800  | 0.50200900  | -2.80749100 |
| H | 4.56013300  | 1.11496000  | -3.64103500 |
| H | 2.52044500  | 0.45574300  | -2.35586500 |
| H | 2.99188200  | -2.63769900 | 1.44798400  |
| H | 5.45067100  | -1.10784100 | 1.74947700  |
| H | 1.88717800  | -1.66495400 | -0.33557000 |
| H | 5.23314000  | -2.61103800 | 0.86887100  |
| C | 2.01817000  | 0.98759100  | 1.63122200  |
| C | 0.57539200  | 0.57353900  | 0.04056700  |
| N | 1.08758500  | 1.89002700  | 1.78059300  |
| N | 1.74663500  | 0.17187300  | 0.56225900  |
| N | 0.19848400  | 1.61782500  | 0.77509700  |
| C | 3.15449600  | 0.63812600  | 2.52132100  |
| H | 4.10431600  | 0.93655100  | 2.06177400  |
| H | 3.04799400  | 1.16792300  | 3.46818300  |
| C | -0.94591700 | 2.44215300  | 0.52346600  |
| C | -0.91854000 | 3.28255800  | -0.59378700 |
| C | -2.04573300 | 2.32718400  | 1.37491900  |
| C | -2.05472000 | 4.05078700  | -0.83745400 |
| C | -3.15490700 | 3.12282800  | 1.09166000  |
| C | -3.17599100 | 3.98504500  | -0.00626900 |
| H | -2.06377600 | 4.71765400  | -1.69558400 |
| H | -4.02684900 | 3.05787800  | 1.73675900  |
| C | 0.28137200  | 3.33693700  | -1.50420500 |
| H | 1.21338100  | 3.38852300  | -0.93374000 |

|    |             |             |             |
|----|-------------|-------------|-------------|
| H  | 0.33256400  | 2.44600600  | -2.14092900 |
| H  | 0.22568100  | 4.20985800  | -2.15552600 |
| C  | -4.39321500 | 4.81964500  | -0.31079600 |
| H  | -4.11535000 | 5.86584100  | -0.48351600 |
| H  | -4.89009600 | 4.45609000  | -1.21917700 |
| H  | -5.11492800 | 4.78133500  | 0.51121300  |
| C  | -2.04152700 | 1.33814500  | 2.50850900  |
| H  | -1.95122500 | 0.31885400  | 2.11299000  |
| H  | -1.20116200 | 1.51003400  | 3.18651900  |
| H  | -2.96964900 | 1.40226700  | 3.07788300  |
| H  | -0.47937100 | -1.54072900 | 1.25682100  |
| H  | -2.36072900 | 0.56035000  | -0.97214600 |
| C  | -3.29996600 | -2.15411800 | -0.47581000 |
| C  | -3.78493900 | -3.02918500 | 0.50410400  |
| C  | -4.11427900 | -1.84872600 | -1.57213600 |
| C  | -5.05607100 | -3.58166100 | 0.38940400  |
| H  | -3.15910900 | -3.26108300 | 1.36070600  |
| C  | -5.38999200 | -2.39345700 | -1.68336500 |
| H  | -3.72529900 | -1.18919200 | -2.34273000 |
| C  | -5.86259800 | -3.26451600 | -0.70376900 |
| H  | -5.42262500 | -4.25850900 | 1.15520700  |
| H  | -6.01097900 | -2.14724700 | -2.53901100 |
| H  | -6.85385000 | -3.69788900 | -0.79267600 |
| Cl | -0.48602400 | -3.76413800 | 0.39457200  |
| C  | 3.08421900  | -0.89075200 | 2.68668500  |
| H  | 2.09583900  | -1.15486700 | 3.07828000  |
| H  | 3.82290500  | -1.22667400 | 3.41877000  |

**IRC-R-10**

|   |             |             |             |
|---|-------------|-------------|-------------|
| C | -0.21926200 | -0.05942100 | -1.05723800 |
| C | -0.90422200 | -2.04264600 | 0.38350500  |
| C | -1.95764000 | -1.50049100 | -0.33187800 |
| C | -1.65079300 | -0.21395100 | -0.81670800 |
| O | 0.44429400  | -0.51174500 | -1.99337800 |
| C | 3.66750700  | -0.45966400 | -0.79636500 |
| C | 4.92586000  | -0.81067400 | -0.32053100 |
| C | 6.06673700  | -0.45661800 | -1.03883500 |
| C | 5.92151400  | 0.25130300  | -2.22862700 |
| C | 4.65274600  | 0.60093400  | -2.70005600 |
| C | 3.51128200  | 0.24556100  | -1.98743600 |
| C | 2.57695100  | -0.92662000 | 0.14283100  |
| C | 3.33288300  | -1.57297200 | 1.36046800  |
| C | 4.84057800  | -1.55854900 | 0.98277700  |
| H | 7.05352200  | -0.72553200 | -0.67348800 |
| H | 6.80192300  | 0.53512400  | -2.79649700 |
| H | 4.55765500  | 1.14942200  | -3.63157300 |
| H | 2.51782000  | 0.49316900  | -2.34783300 |
| H | 2.98404000  | -2.60305000 | 1.45430400  |
| H | 5.44297300  | -1.07323100 | 1.75992800  |
| H | 1.89367800  | -1.63287100 | -0.33710900 |
| H | 5.22629100  | -2.57712500 | 0.87981800  |
| C | 2.00736700  | 1.01738200  | 1.64197400  |
| C | 0.57461000  | 0.64367000  | 0.02609300  |
| N | 1.08265300  | 1.92383000  | 1.79495000  |
| N | 1.73384000  | 0.20974300  | 0.56407400  |
| N | 0.19830300  | 1.66863300  | 0.78431400  |
| C | 3.14507200  | 0.66886500  | 2.53092000  |

|    |             |             |             |
|----|-------------|-------------|-------------|
| H  | 4.09361500  | 0.96993300  | 2.07035500  |
| H  | 3.03764600  | 1.19942800  | 3.47745000  |
| C  | -0.94733900 | 2.48826600  | 0.53759100  |
| C  | -0.92297800 | 3.32158400  | -0.58389100 |
| C  | -2.04832400 | 2.36533000  | 1.38660100  |
| C  | -2.06108900 | 4.08561300  | -0.82930700 |
| C  | -3.15948400 | 3.15665200  | 1.10069400  |
| C  | -3.18154400 | 4.01895500  | 0.00238600  |
| H  | -2.07230700 | 4.75093000  | -1.68895900 |
| H  | -4.03283400 | 3.08858200  | 1.74393000  |
| C  | 0.27621300  | 3.37684200  | -1.49566800 |
| H  | 1.21006400  | 3.41690400  | -0.92719300 |
| H  | 0.32061600  | 2.49551200  | -2.14499100 |
| H  | 0.22489200  | 4.25812800  | -2.13658200 |
| C  | -4.39830000 | 4.85350900  | -0.30126600 |
| H  | -4.12272800 | 5.89702500  | -0.47520800 |
| H  | -4.89626900 | 4.49198400  | -1.20609400 |
| H  | -5.11826000 | 4.81808800  | 0.51836000  |
| C  | -2.04331700 | 1.37218400  | 2.51693100  |
| H  | -1.94153000 | 0.35498500  | 2.11809800  |
| H  | -1.20854100 | 1.54802000  | 3.20057600  |
| H  | -2.97526600 | 1.42814400  | 3.08093700  |
| H  | -0.21450700 | -1.46783600 | 0.98166500  |
| H  | -2.31749600 | 0.63992800  | -0.71547600 |
| C  | -3.29311600 | -2.13183100 | -0.47676900 |
| C  | -3.78854800 | -2.99747600 | 0.50825600  |
| C  | -4.11257300 | -1.81503300 | -1.56494800 |
| C  | -5.06066500 | -3.54674300 | 0.39609500  |
| H  | -3.16786000 | -3.22185800 | 1.37057300  |
| C  | -5.39120300 | -2.35671500 | -1.67446500 |
| H  | -3.72475200 | -1.14551300 | -2.32771900 |
| C  | -5.86691500 | -3.22812700 | -0.69714600 |
| H  | -5.42996300 | -4.21719300 | 1.16603800  |
| H  | -6.01375000 | -2.10367000 | -2.52715500 |
| H  | -6.86095100 | -3.65548000 | -0.78455800 |
| Cl | -0.49439300 | -3.74922500 | 0.41316100  |
| C  | 3.07829700  | -0.85894200 | 2.69661900  |
| H  | 2.09181500  | -1.12516600 | 3.09125200  |
| H  | 3.81916200  | -1.19452900 | 3.42624900  |

**IRC-R-20**

|   |             |             |             |
|---|-------------|-------------|-------------|
| C | -0.22262000 | -0.02219700 | -1.06933300 |
| C | -0.91958400 | -2.10660200 | 0.37489400  |
| C | -1.94080900 | -1.52832400 | -0.33087500 |
| C | -1.61804700 | -0.19961100 | -0.76977400 |
| O | 0.44944800  | -0.55865300 | -1.96027800 |
| C | 3.66883900  | -0.45206700 | -0.80029100 |
| C | 4.92494600  | -0.80794300 | -0.32243300 |
| C | 6.06744100  | -0.45704500 | -1.03962200 |
| C | 5.92433600  | 0.25104100  | -2.22970800 |
| C | 4.65696200  | 0.60283500  | -2.70365700 |
| C | 3.51406500  | 0.25080100  | -1.99212600 |
| C | 2.57293800  | -0.91313200 | 0.13281500  |
| C | 3.32372800  | -1.56855700 | 1.35196300  |
| C | 4.83368100  | -1.55606900 | 0.98011800  |
| H | 7.05345500  | -0.72819100 | -0.67385100 |
| H | 6.80587400  | 0.53298500  | -2.79676600 |



|    |             |             |             |
|----|-------------|-------------|-------------|
| H  | 4.56472300  | 1.15022900  | -3.63609600 |
| H  | 2.51996700  | 0.49722800  | -2.35273900 |
| H  | 2.97262600  | -2.59881100 | 1.43573700  |
| H  | 5.43345200  | -1.07164000 | 1.75987600  |
| H  | 1.89448400  | -1.61621900 | -0.35615000 |
| H  | 5.21819100  | -2.57527100 | 0.87880300  |
| C  | 1.99675700  | 1.01429700  | 1.64301800  |
| C  | 0.58053100  | 0.69890400  | -0.00365400 |
| N  | 1.08196100  | 1.92745400  | 1.80638900  |
| N  | 1.72647000  | 0.22957300  | 0.54642500  |
| N  | 0.21001600  | 1.70727600  | 0.77893600  |
| C  | 3.13292000  | 0.66092200  | 2.53112500  |
| H  | 4.08083800  | 0.96500500  | 2.07090000  |
| H  | 3.02457400  | 1.19055000  | 3.47811100  |
| C  | -0.93787200 | 2.52253300  | 0.54621000  |
| C  | -0.92318500 | 3.34336500  | -0.58359900 |
| C  | -2.03967000 | 2.38349200  | 1.39270400  |
| C  | -2.06824500 | 4.09423400  | -0.83297000 |
| C  | -3.15866900 | 3.16144000  | 1.10132700  |
| C  | -3.18570300 | 4.02208200  | 0.00134300  |
| H  | -2.08752700 | 4.75421100  | -1.69657900 |
| H  | -4.03402700 | 3.08488600  | 1.74093500  |
| C  | 0.27243400  | 3.39880600  | -1.50042100 |
| H  | 1.20991600  | 3.42231800  | -0.93760600 |
| H  | 0.30367200  | 2.52624800  | -2.16200700 |
| H  | 0.22586700  | 4.28907300  | -2.12920800 |
| C  | -4.40477900 | 4.85261300  | -0.30203400 |
| H  | -4.13099200 | 5.89670400  | -0.47542900 |
| H  | -4.90225800 | 4.49080000  | -1.20700300 |
| H  | -5.12444500 | 4.81594700  | 0.51778700  |
| C  | -2.03237500 | 1.38076900  | 2.51563400  |
| H  | -1.90542400 | 0.36870200  | 2.11099700  |
| H  | -1.21119400 | 1.56527900  | 3.21321600  |
| H  | -2.97363300 | 1.41549500  | 3.06582700  |
| H  | -0.10528900 | -1.53133000 | 0.78729500  |
| H  | -2.24342500 | 0.63982300  | -0.48441900 |
| C  | -3.28289700 | -2.14037100 | -0.48372200 |
| C  | -3.78644100 | -3.00264800 | 0.50101800  |
| C  | -4.10180200 | -1.81271100 | -1.56895900 |
| C  | -5.06089800 | -3.54518500 | 0.38858400  |
| H  | -3.17222600 | -3.22758000 | 1.36755000  |
| C  | -5.38215400 | -2.35085900 | -1.68020600 |
| H  | -3.71511300 | -1.13470500 | -2.32467000 |
| C  | -5.86369900 | -3.22219000 | -0.70545600 |
| H  | -5.43474400 | -4.21101000 | 1.16025600  |
| H  | -6.00412500 | -2.09081000 | -2.53113400 |
| H  | -6.86088800 | -3.64190300 | -0.79341500 |
| Cl | -0.51600200 | -3.80782800 | 0.43182500  |
| C  | 3.07015100  | -0.86556700 | 2.69336700  |
| H  | 2.08503700  | -1.13607900 | 3.08866800  |
| H  | 3.81394900  | -1.20295700 | 3.41919200  |

**IRC-R-50**

|   |             |             |             |
|---|-------------|-------------|-------------|
| C | -0.19874000 | -0.02880600 | -1.03747600 |
| C | -0.86178800 | -2.31007600 | 0.29029900  |
| C | -1.87551000 | -1.64583700 | -0.31346200 |
| C | -1.52412300 | -0.26099800 | -0.62383900 |

|   |             |             |             |
|---|-------------|-------------|-------------|
| O | 0.48081800  | -0.61121400 | -1.90797500 |
| C | 3.66923500  | -0.41175700 | -0.81450800 |
| C | 4.91791700  | -0.78528500 | -0.33128900 |
| C | 6.06713500  | -0.45432900 | -1.04702300 |
| C | 5.93672200  | 0.24956500  | -2.24134700 |
| C | 4.67557400  | 0.61414600  | -2.72294900 |
| C | 3.52558000  | 0.28204900  | -2.01278400 |
| C | 2.56414600  | -0.86423400 | 0.10976400  |
| C | 3.29457700  | -1.54710100 | 1.32190700  |
| C | 4.80939500  | -1.53343000 | 0.97072800  |
| H | 7.04844800  | -0.73875300 | -0.67859000 |
| H | 6.82369200  | 0.51630000  | -2.80735200 |
| H | 4.59435300  | 1.15466400  | -3.66047400 |
| H | 2.53300900  | 0.53132900  | -2.37727200 |
| H | 2.93998900  | -2.57845000 | 1.37662700  |
| H | 5.39875800  | -1.04910100 | 1.75864300  |
| H | 1.88900400  | -1.54953300 | -0.40288600 |
| H | 5.19577100  | -2.55244600 | 0.87500700  |
| C | 1.99196400  | 1.04765600  | 1.64352600  |
| C | 0.58983100  | 0.77072400  | -0.02450800 |
| N | 1.09612500  | 1.97886200  | 1.80216200  |
| N | 1.72567500  | 0.28267400  | 0.53199400  |
| N | 0.23846400  | 1.79469900  | 0.75145100  |
| C | 3.10194300  | 0.65426700  | 2.54925200  |
| H | 4.06483200  | 0.95739100  | 2.12064700  |
| H | 2.97810200  | 1.16186200  | 3.50640700  |
| C | -0.91569200 | 2.60929900  | 0.54067200  |
| C | -0.93027200 | 3.42878200  | -0.59041200 |
| C | -2.00558200 | 2.45889800  | 1.40204200  |
| C | -2.09372300 | 4.15340000  | -0.83316900 |
| C | -3.14550900 | 3.20823000  | 1.11500400  |
| C | -3.20428600 | 4.05724600  | 0.00756900  |
| H | -2.13545600 | 4.80640900  | -1.70141200 |
| H | -4.01341900 | 3.11391700  | 1.76244600  |
| C | 0.25182200  | 3.49938100  | -1.52252400 |
| H | 1.19605100  | 3.53400900  | -0.97204400 |
| H | 0.28371700  | 2.62375200  | -2.18021900 |
| H | 0.18584500  | 4.38728200  | -2.15302700 |
| C | -4.44933900 | 4.84731300  | -0.29943800 |
| H | -4.21064500 | 5.90113800  | -0.46610300 |
| H | -4.92774200 | 4.47322800  | -1.20965000 |
| H | -5.17295300 | 4.78213000  | 0.51510800  |
| C | -1.96668500 | 1.46866200  | 2.53660700  |
| H | -1.74516000 | 0.46469800  | 2.15450200  |
| H | -1.18982700 | 1.72190700  | 3.26295800  |
| H | -2.92923600 | 1.43688400  | 3.04905300  |
| H | 0.03384100  | -1.79850000 | 0.60644200  |
| H | -2.08969500 | 0.52351500  | -0.13306200 |
| C | -3.24439400 | -2.18984300 | -0.48296300 |
| C | -3.78862900 | -3.04594300 | 0.48460700  |
| C | -4.04171600 | -1.81120200 | -1.56818300 |
| C | -5.07957100 | -3.54226300 | 0.35139500  |
| H | -3.19583800 | -3.30772600 | 1.35484600  |
| C | -5.33481000 | -2.31149900 | -1.70480000 |
| H | -3.63120200 | -1.12637000 | -2.30487900 |
| C | -5.85530600 | -3.18262300 | -0.74963500 |
| H | -5.48429300 | -4.20382000 | 1.11089200  |

|    |             |             |             |
|----|-------------|-------------|-------------|
| H  | -5.93814100 | -2.01958200 | -2.55865600 |
| H  | -6.86313600 | -3.57101000 | -0.85685100 |
| Cl | -0.65003100 | -4.02956300 | 0.48327300  |
| C  | 3.02047800  | -0.87504800 | 2.67381800  |
| H  | 2.02482200  | -1.14554100 | 3.04150700  |
| H  | 3.74587400  | -1.23631800 | 3.40681000  |

**IRC-R-80**

|   |             |             |             |
|---|-------------|-------------|-------------|
| C | -0.18034100 | -0.07132400 | -0.99398000 |
| C | -0.83406600 | -2.52983600 | 0.22818100  |
| C | -1.82733500 | -1.77783600 | -0.28577000 |
| C | -1.44578500 | -0.37195800 | -0.49297400 |
| O | 0.49878300  | -0.62647400 | -1.88924900 |
| C | 3.68045300  | -0.37186400 | -0.81501800 |
| C | 4.92591500  | -0.75329200 | -0.33008100 |
| C | 6.07685500  | -0.44162800 | -1.05167800 |
| C | 5.95129600  | 0.25265300  | -2.25229600 |
| C | 4.69312600  | 0.62711800  | -2.73442400 |
| C | 3.54102700  | 0.31276900  | -2.01919800 |
| C | 2.57279900  | -0.81972400 | 0.10837600  |
| C | 3.29475000  | -1.50339900 | 1.32127500  |
| C | 4.81121100  | -1.49139200 | 0.97787800  |
| H | 7.05591900  | -0.73426800 | -0.68366100 |
| H | 6.83984000  | 0.50392500  | -2.82291200 |
| H | 4.61576800  | 1.15951600  | -3.67693600 |
| H | 2.54942600  | 0.56485200  | -2.38487500 |
| H | 2.94041400  | -2.53503000 | 1.37480200  |
| H | 5.39648500  | -1.00048000 | 1.76486500  |
| H | 1.90058400  | -1.49971600 | -0.41282800 |
| H | 5.19887700  | -2.51079800 | 0.89244100  |
| C | 2.00649700  | 1.10616400  | 1.62749800  |
| C | 0.59267400  | 0.79385700  | -0.02383800 |
| N | 1.11464800  | 2.04379500  | 1.77062600  |
| N | 1.73673100  | 0.32679500  | 0.52853600  |
| N | 0.25223300  | 1.84459900  | 0.72268600  |
| C | 3.10204200  | 0.70151500  | 2.54746600  |
| H | 4.07417000  | 0.99687500  | 2.13497600  |
| H | 2.96886000  | 1.20715700  | 3.50444900  |
| C | -0.90836500 | 2.65660900  | 0.52173000  |
| C | -0.94391100 | 3.47869700  | -0.60793600 |
| C | -1.97588300 | 2.52582400  | 1.41345400  |
| C | -2.11430300 | 4.19747400  | -0.83487400 |
| C | -3.12595900 | 3.26503900  | 1.13851600  |
| C | -3.21369300 | 4.09632300  | 0.02076600  |
| H | -2.17231700 | 4.84644700  | -1.70529500 |
| H | -3.97838800 | 3.17691300  | 1.80700100  |
| C | 0.22872900  | 3.56092600  | -1.55026300 |
| H | 1.17314700  | 3.64526100  | -1.00522500 |
| H | 0.28929200  | 2.66575200  | -2.17912500 |
| H | 0.12881800  | 4.42584800  | -2.20763000 |
| C | -4.47638300 | 4.86060400  | -0.28064000 |
| H | -4.26292800 | 5.92088500  | -0.44112700 |
| H | -4.94585900 | 4.48080700  | -1.19306900 |
| H | -5.19818400 | 4.77345600  | 0.53347300  |
| C | -1.89699100 | 1.59318500  | 2.59427300  |
| H | -1.55008600 | 0.60016300  | 2.28583200  |
| H | -1.19246600 | 1.96603500  | 3.34392300  |

|    |             |             |             |
|----|-------------|-------------|-------------|
| H  | -2.87791200 | 1.48614100  | 3.06044700  |
| H  | 0.12357000  | -2.09707800 | 0.47857700  |
| H  | -1.97975100 | 0.36572500  | 0.09620100  |
| C  | -3.22232900 | -2.24847800 | -0.46729300 |
| C  | -3.82009400 | -3.09195300 | 0.47807700  |
| C  | -3.98031500 | -1.82061000 | -1.56215700 |
| C  | -5.12820800 | -3.53102100 | 0.31202200  |
| H  | -3.25673500 | -3.39081500 | 1.35549900  |
| C  | -5.28838100 | -2.26655100 | -1.73338800 |
| H  | -3.52800500 | -1.14225000 | -2.27998800 |
| C  | -5.86375200 | -3.12779400 | -0.80077800 |
| H  | -5.57596500 | -4.18375300 | 1.05481500  |
| H  | -5.86107500 | -1.94010700 | -2.59581700 |
| H  | -6.88377900 | -3.47378500 | -0.93458300 |
| Cl | -0.80006500 | -4.25544600 | 0.48074800  |
| C  | 3.00669600  | -0.82868300 | 2.66873600  |
| H  | 2.00363400  | -1.09161400 | 3.02163000  |
| H  | 3.71848000  | -1.19480100 | 3.41263200  |

### Coordinates of stationary points of IRC points involved in Z-TS1<sup>P</sup>

#### IRC-R-46

|    |             |             |             |
|----|-------------|-------------|-------------|
| C  | -0.44047700 | -0.58667700 | 0.41593300  |
| C  | -1.56990700 | 0.41470400  | 0.57822000  |
| C  | -2.43829300 | -0.80556800 | 0.15685700  |
| C  | -1.25540700 | -1.66608700 | 0.28997000  |
| H  | -1.73093900 | 0.78841200  | 1.58968100  |
| H  | -1.08920300 | -2.73224700 | 0.21283400  |
| O  | -3.55395200 | -0.90783700 | -0.28077700 |
| C  | 0.99217400  | -0.39195700 | 0.28394100  |
| C  | 1.59502400  | 0.83243100  | 0.59760700  |
| C  | 1.76455200  | -1.42949800 | -0.25788200 |
| C  | 2.95535900  | 1.01142800  | 0.36908800  |
| H  | 0.99638900  | 1.63972100  | 1.00891900  |
| C  | 3.11925900  | -1.24511600 | -0.48779900 |
| H  | 1.28853500  | -2.36878300 | -0.52242200 |
| C  | 3.71423600  | -0.02148400 | -0.17839000 |
| H  | 3.42272700  | 1.96081200  | 0.60733800  |
| H  | 3.71005700  | -2.04630700 | -0.91864500 |
| H  | 4.77179600  | 0.12877300  | -0.36939200 |
| Cl | -1.59535600 | 1.82585600  | -0.52493100 |

#### IRC-R-15

|    |             |             |             |
|----|-------------|-------------|-------------|
| C  | -0.50331300 | -0.48882200 | 0.49140400  |
| C  | -1.67216100 | 0.45340300  | 0.48014900  |
| C  | -2.43279100 | -0.98155100 | 0.10616600  |
| C  | -1.22573000 | -1.63228800 | 0.59085900  |
| H  | -1.97301000 | 0.77676400  | 1.47453100  |
| H  | -0.97448600 | -2.66422900 | 0.80000200  |
| O  | -3.41334800 | -1.34590100 | -0.48215500 |
| C  | 0.91433400  | -0.30113200 | 0.26012200  |
| C  | 1.58389500  | 0.89230500  | 0.54807800  |
| C  | 1.61046700  | -1.38018100 | -0.30388800 |
| C  | 2.95192200  | 0.97981900  | 0.31802300  |
| H  | 1.03997100  | 1.73028200  | 0.97109700  |
| C  | 2.97372900  | -1.28644700 | -0.53197900 |
| H  | 1.06860700  | -2.28165700 | -0.57122100 |
| C  | 3.64543500  | -0.10693500 | -0.21277000 |
| H  | 3.48113800  | 1.89629800  | 0.55541100  |
| H  | 3.51161700  | -2.12359700 | -0.96365100 |
| H  | 4.71340200  | -0.02971300 | -0.38885900 |
| Cl | -1.44411700 | 2.01519900  | -0.43278400 |

#### IRC-R-13

|   |             |             |             |
|---|-------------|-------------|-------------|
| C | -0.50902300 | -0.48000200 | 0.49168300  |
| C | -1.66279600 | 0.46715200  | 0.48092000  |
| C | -2.43813300 | -1.01557300 | 0.10485000  |
| C | -1.22345800 | -1.63146100 | 0.60377200  |
| H | -1.97498800 | 0.78225200  | 1.47405800  |
| H | -0.95818900 | -2.65190100 | 0.85005000  |
| O | -3.41739400 | -1.36750400 | -0.49146000 |
| C | 0.90876900  | -0.29841500 | 0.25243900  |
| C | 1.58161000  | 0.89267800  | 0.54360500  |
| C | 1.60500000  | -1.37932200 | -0.30791800 |
| C | 2.95027600  | 0.97838200  | 0.31792800  |
| H | 1.03873100  | 1.73065000  | 0.96786300  |

|    |             |             |             |
|----|-------------|-------------|-------------|
| C  | 2.96973800  | -1.28779200 | -0.53110200 |
| H  | 1.06275100  | -2.28036700 | -0.57619300 |
| C  | 3.64314600  | -0.10919400 | -0.21211300 |
| H  | 3.48018700  | 1.89360100  | 0.55853000  |
| H  | 3.50754600  | -2.12672200 | -0.95940700 |
| H  | 4.71163500  | -0.03419300 | -0.38599600 |
| Cl | -1.43511100 | 2.02886600  | -0.42928400 |

**IRC-R-11**

|    |             |             |             |
|----|-------------|-------------|-------------|
| C  | -0.51501500 | -0.46960700 | 0.49270500  |
| C  | -1.64593900 | 0.48624300  | 0.48521600  |
| C  | -2.44209700 | -1.05730600 | 0.10252700  |
| C  | -1.22258100 | -1.63178900 | 0.61343100  |
| H  | -1.98739700 | 0.78342900  | 1.47406100  |
| H  | -0.94690900 | -2.63849200 | 0.90206400  |
| O  | -3.42433800 | -1.37928500 | -0.50025100 |
| C  | 0.90382900  | -0.29625500 | 0.24499800  |
| C  | 1.58015500  | 0.89248600  | 0.54036400  |
| C  | 1.60112400  | -1.37877400 | -0.31067700 |
| C  | 2.94923700  | 0.97738200  | 0.31811000  |
| H  | 1.03793000  | 1.73023700  | 0.96594500  |
| C  | 2.96728400  | -1.28860200 | -0.53010500 |
| H  | 1.05892500  | -2.27987100 | -0.57926300 |
| C  | 3.64187400  | -0.11051900 | -0.21193800 |
| H  | 3.47943100  | 1.89170200  | 0.56146100  |
| H  | 3.50519600  | -2.12894800 | -0.95550700 |
| H  | 4.71065600  | -0.03684200 | -0.38467900 |
| Cl | -1.42915400 | 2.03855800  | -0.42703900 |

**IRC-R-10**

|    |             |             |             |
|----|-------------|-------------|-------------|
| C  | -0.51814300 | -0.46401400 | 0.49323200  |
| C  | -1.63584100 | 0.49652800  | 0.48796700  |
| C  | -2.44340500 | -1.07941900 | 0.10121800  |
| C  | -1.22302100 | -1.63220800 | 0.61714600  |
| H  | -1.99990000 | 0.78079900  | 1.47236200  |
| H  | -0.94438800 | -2.63174200 | 0.92734700  |
| O  | -3.42782900 | -1.38222200 | -0.50397800 |
| C  | 0.90164300  | -0.29531200 | 0.24144500  |
| C  | 1.57967700  | 0.89229100  | 0.53914900  |
| C  | 1.59964300  | -1.37855400 | -0.31166900 |
| C  | 2.94889500  | 0.97701000  | 0.31823100  |
| H  | 1.03763900  | 1.72990300  | 0.96530800  |
| C  | 2.96647200  | -1.28886400 | -0.52964300 |
| H  | 1.05751800  | -2.27977500 | -0.58021400 |
| C  | 3.64150400  | -0.11096700 | -0.21195000 |
| H  | 3.47916400  | 1.89098700  | 0.56271200  |
| H  | 3.50445200  | -2.12979000 | -0.95382700 |
| H  | 4.71038300  | -0.03773200 | -0.38434100 |
| Cl | -1.42704600 | 2.04217700  | -0.42623000 |

**IRC-1**

|   |             |             |            |
|---|-------------|-------------|------------|
| C | -0.60784100 | -0.38935800 | 0.48214200 |
| C | -1.60812700 | 0.59993400  | 0.50123800 |
| C | -2.51443000 | -1.23095700 | 0.07944100 |
| C | -1.30685500 | -1.60995700 | 0.61872800 |
| H | -2.26604000 | 0.71699800  | 1.34973700 |
| H | -1.03686300 | -2.55597400 | 1.07162300 |

|    |             |             |             |
|----|-------------|-------------|-------------|
| O  | -3.50914100 | -1.35039000 | -0.53309700 |
| C  | 0.82517500  | -0.26322600 | 0.20429100  |
| C  | 1.51398300  | 0.91595800  | 0.52049700  |
| C  | 1.52789800  | -1.35115900 | -0.32875600 |
| C  | 2.88351000  | 1.00077400  | 0.30504000  |
| H  | 0.97320000  | 1.75264100  | 0.95077200  |
| C  | 2.89903300  | -1.26363600 | -0.54049100 |
| H  | 0.98689200  | -2.25466600 | -0.59381800 |
| C  | 3.57655900  | -0.08717300 | -0.22599100 |
| H  | 3.41394800  | 1.91334700  | 0.55514000  |
| H  | 3.43715700  | -2.10810100 | -0.95787100 |
| H  | 4.64605900  | -0.01622300 | -0.39582000 |
| Cl | -1.48321500 | 2.08399400  | -0.43599000 |

**IRC-F-5**

|    |             |             |             |
|----|-------------|-------------|-------------|
| C  | -0.55131800 | -0.39705900 | 0.49729900  |
| C  | -1.51128100 | 0.60148400  | 0.52504900  |
| C  | -2.45123900 | -1.32297700 | 0.08670400  |
| C  | -1.25225400 | -1.63626800 | 0.63878500  |
| H  | -2.28468500 | 0.64580600  | 1.28086500  |
| H  | -0.98325800 | -2.56843700 | 1.11905700  |
| O  | -3.44865000 | -1.36979200 | -0.52132800 |
| C  | 0.88579400  | -0.28627000 | 0.21004300  |
| C  | 1.57853700  | 0.88943800  | 0.53247200  |
| C  | 1.58995900  | -1.37573600 | -0.31669000 |
| C  | 2.94813200  | 0.97436900  | 0.31827500  |
| H  | 1.03930200  | 1.72529100  | 0.96646000  |
| C  | 2.96243700  | -1.28888000 | -0.52664000 |
| H  | 1.05010500  | -2.28099700 | -0.57858300 |
| C  | 3.64137500  | -0.11325600 | -0.21301700 |
| H  | 3.47856400  | 1.88633000  | 0.57110500  |
| H  | 3.50029400  | -2.13478400 | -0.94178100 |
| H  | 4.71121200  | -0.04357700 | -0.38119900 |
| Cl | -1.41603400 | 2.06362100  | -0.42155700 |

**IRC-F-10**

|    |             |             |             |
|----|-------------|-------------|-------------|
| C  | -0.56277900 | -0.37145000 | 0.50103600  |
| C  | -1.46839800 | 0.64559200  | 0.54099900  |
| C  | -2.45975100 | -1.44167700 | 0.07569300  |
| C  | -1.26730100 | -1.63566300 | 0.65004700  |
| H  | -2.37927500 | 0.58475000  | 1.12230100  |
| H  | -0.98111400 | -2.54796100 | 1.15568800  |
| O  | -3.45456700 | -1.36457300 | -0.52172900 |
| C  | 0.87894300  | -0.28213200 | 0.20176400  |
| C  | 1.57874300  | 0.88836600  | 0.52990400  |
| C  | 1.58479300  | -1.37339100 | -0.31882200 |
| C  | 2.94844400  | 0.97294400  | 0.31699200  |
| H  | 1.04323300  | 1.72284100  | 0.97114500  |
| C  | 2.95911200  | -1.28806800 | -0.52633800 |
| H  | 1.04740100  | -2.28205400 | -0.57422400 |
| C  | 3.64171400  | -0.11450300 | -0.21379500 |
| H  | 3.47888900  | 1.88382600  | 0.57430100  |
| H  | 3.49588000  | -2.13711300 | -0.93692900 |
| H  | 4.71236500  | -0.04817300 | -0.37798600 |
| Cl | -1.40870900 | 2.07795400  | -0.42039700 |

**IRC-F-15**

|    |             |             |             |
|----|-------------|-------------|-------------|
| C  | -0.57934700 | -0.35431700 | 0.50197000  |
| C  | -1.45519500 | 0.67900400  | 0.53976000  |
| C  | -2.46353800 | -1.55255300 | 0.06384500  |
| C  | -1.27712400 | -1.64014300 | 0.66478200  |
| H  | -2.42406000 | 0.57266200  | 1.00995000  |
| H  | -0.93655000 | -2.53484100 | 1.16696700  |
| O  | -3.45807500 | -1.39299600 | -0.51632800 |
| C  | 0.86772500  | -0.27754500 | 0.20054400  |
| C  | 1.57699700  | 0.88839000  | 0.52804500  |
| C  | 1.57349300  | -1.36914600 | -0.32081700 |
| C  | 2.94724000  | 0.97032000  | 0.31427800  |
| H  | 1.04812500  | 1.72401300  | 0.97502800  |
| C  | 2.94925700  | -1.28790600 | -0.52731700 |
| H  | 1.03717400  | -2.27932100 | -0.57303900 |
| C  | 3.63877000  | -0.11831600 | -0.21538800 |
| H  | 3.47874900  | 1.87976200  | 0.57467100  |
| H  | 3.48214500  | -2.14088700 | -0.93496300 |
| H  | 4.71023700  | -0.05764400 | -0.37627800 |
| Cl | -1.38761700 | 2.11259400  | -0.41764200 |

**IRC-F-25**

|    |             |             |             |
|----|-------------|-------------|-------------|
| C  | -0.61164900 | -0.32837100 | 0.47803500  |
| C  | -1.48210100 | 0.70505600  | 0.47118200  |
| C  | -2.45532300 | -1.65140200 | 0.07252400  |
| C  | -1.27285700 | -1.63494600 | 0.67720200  |
| H  | -2.48464300 | 0.59452400  | 0.86326200  |
| H  | -0.87840600 | -2.49097900 | 1.20611400  |
| O  | -3.46092900 | -1.54861400 | -0.50143400 |
| C  | 0.84302800  | -0.26151100 | 0.20179900  |
| C  | 1.56601500  | 0.89458700  | 0.53192200  |
| C  | 1.53721600  | -1.35906700 | -0.32280100 |
| C  | 2.93694800  | 0.96174600  | 0.31461300  |
| H  | 1.05037700  | 1.73654700  | 0.98144800  |
| C  | 2.91303400  | -1.29283800 | -0.53253500 |
| H  | 0.99155700  | -2.26281400 | -0.57730500 |
| C  | 3.61619800  | -0.13177500 | -0.22011500 |
| H  | 3.47818400  | 1.86503900  | 0.57639300  |
| H  | 3.43478700  | -2.15094000 | -0.94380000 |
| H  | 4.68768300  | -0.08169300 | -0.38438600 |
| Cl | -1.31826300 | 2.19515300  | -0.39411100 |

**IRC-F-40**

|   |             |             |             |
|---|-------------|-------------|-------------|
| C | -0.65240700 | -0.28173100 | 0.42992900  |
| C | -1.51430400 | 0.75156600  | 0.36116100  |
| C | -2.45285300 | -1.75983100 | 0.09083400  |
| C | -1.27825500 | -1.59830300 | 0.68090400  |
| H | -2.54729200 | 0.64696200  | 0.66534500  |
| H | -0.83789400 | -2.39246100 | 1.26769000  |
| O | -3.47071200 | -1.81641100 | -0.46849300 |
| C | 0.81158800  | -0.23043800 | 0.19627300  |
| C | 1.55724600  | 0.90434400  | 0.54628100  |
| C | 1.48352700  | -1.33659200 | -0.33880400 |
| C | 2.92998400  | 0.94336000  | 0.33129200  |
| H | 1.06215400  | 1.75221400  | 1.00597000  |
| C | 2.85958200  | -1.29790100 | -0.54754800 |
| H | 0.91886200  | -2.22470600 | -0.60557800 |
| C | 3.58594500  | -0.15546700 | -0.22065000 |



|    |             |             |             |
|----|-------------|-------------|-------------|
| H  | 3.49050300  | 1.83075000  | 0.60663000  |
| H  | 3.36297300  | -2.16137000 | -0.97018100 |
| H  | 4.65796800  | -0.12439900 | -0.38610100 |
| Cl | -1.22029700 | 2.30113300  | -0.35716100 |

**IRC-F-50**

|    |             |             |             |
|----|-------------|-------------|-------------|
| C  | -0.67773700 | -0.24581300 | 0.39621200  |
| C  | -1.52697500 | 0.79304200  | 0.30049800  |
| C  | -2.45265400 | -1.82147800 | 0.10307100  |
| C  | -1.28875100 | -1.56379600 | 0.67499800  |
| H  | -2.57403000 | 0.69803200  | 0.55947900  |
| H  | -0.82367200 | -2.32000400 | 1.29376700  |
| O  | -3.46986700 | -2.00176300 | -0.43087200 |
| C  | 0.79130800  | -0.20732700 | 0.18602800  |
| C  | 1.55486500  | 0.90492800  | 0.56651800  |
| C  | 1.44579900  | -1.31405200 | -0.36886800 |
| C  | 2.92994900  | 0.92119100  | 0.36164000  |
| H  | 1.07270400  | 1.75231100  | 1.04017600  |
| C  | 2.82290400  | -1.29741800 | -0.56957600 |
| H  | 0.86587500  | -2.18544300 | -0.65693900 |
| C  | 3.56839800  | -0.17677100 | -0.21192700 |
| H  | 3.50575000  | 1.79109400  | 0.66037200  |
| H  | 3.31223300  | -2.16048200 | -1.00913900 |
| H  | 4.64180000  | -0.16205400 | -0.37050100 |
| Cl | -1.16283800 | 2.36455400  | -0.34237900 |
